1 **Title:**

2 Effects of early life stress on biochemical indicators of the dopaminergic system: a 3 level  
3 meta-analysis of rodent studies

4

5 **Author details:**

6 V. Bonapersona<sup>a,\*</sup>, M. Joëls<sup>a,b</sup>, R. A. Sarabdjitsingh<sup>a</sup>

7

8 **Affiliation:**

9 <sup>a</sup> *Department of Translational Neuroscience, Brain Center Rudolf Magnus, University Medical  
10 Center Utrecht, Utrecht University, The Netherlands*

11 <sup>b</sup> *University of Groningen, University Medical Center Groningen, The Netherlands*

12

13 \* Corresponding author: [v.bonapersona-2@umcutrecht.nl](mailto:v.bonapersona-2@umcutrecht.nl), Universiteitsweg 100, 3584 CG

14 Utrecht (NL)

15

16

## 17 **1 INTRODUCTION**

---

18 During the perinatal period, the brain matures and is rapidly wired(Semple et al. 2013),  
19 rendering it particularly vulnerable to negative life experiences that might lastingly impact  
20 brain function and behavior(Levine 2005). This may contribute to the well-established  
21 observation that exposure to adverse conditions during childhood is a major risk factor for  
22 the later development of psychopathologies(Teicher et al. 2016), including schizophrenia and  
23 substance abuse(Agid et al. 1999; Enoch 2011; Dube et al. 2003; Scheller-Gilkey et al. 2002).

24 Prevailing evidence highlights that the dopamine (DA) system may be a prime candidate in  
25 mediating the influence of adverse events early in life on vulnerability to  
26 psychopathology(Gatzke-Kopp 2011). The DA system develops early during the embryonic  
27 period, matures throughout adolescence, and forms stable patterns during young  
28 adulthood(Money and Stanwood 2013). This prolonged development provides an extensive  
29 window of time in which adverse conditions early in life can tip the balance towards  
30 dysfunction(Money and Stanwood 2013). Indeed, alterations in this system have been  
31 consistently associated with mental disorders (for a review: (Money and Stanwood 2013)). For  
32 example, genetic variations of the DA degradation enzyme COMT are associated with  
33 schizophrenia and bipolar disorder as well as an increased risk for psychosis, autism and  
34 anxiety(Money and Stanwood 2013). In line, the DA receptor 2 is a major target for  
35 antipsychotics.

36 Overall, the associative studies in humans have led to the assumption that childhood  
37 adversities result in developmental alterations of the dopaminergic system. To investigate  
38 causality, preclinical studies using animal models have adopted behavioral early life stress  
39 (ELS) paradigms to mimic negative childhood conditions, aiming to understand the

40 neurobiological substrate by which ELS adds to the development of DA system dysfunction.  
41 Although extensive, the existing literature is quite heterogeneous: it uses disparate models  
42 and outcome measures, and each study focuses on only a limited number of variables;  
43 moreover, preclinical studies are frequently underpowered(Button et al. 2013). The resulting  
44 findings are rather incoherent and difficult to interpret. This limitation hinders our  
45 understanding of the entire biological system and its development, and delays translational  
46 applicability.

47 To overcome these limitations, we performed a meta-analysis, a powerful method still  
48 sparsely applied to preclinical research allowing to systematically synthesize the scientific  
49 knowledge of a specific topic. Recent advances in the field of statistics such as the 3-level  
50 approach (Cheung 2014b; Assink and Wibbelink 2016) along with their implementation in R  
51 packages(Viechtbauer 2010; Cheung 2014a) now enable researchers to use more  
52 sophisticated and robust methodology when analyzing meta-data. This method allows to  
53 include multiple data-points from a single study (nesting), without necessarily knowing their  
54 (often unreported) covariance. Ultimately, this substantially increases the flexibility of meta-  
55 analysis applications and improves the validity of the conclusions drawn.

56 Here, we aimed to investigate whether preclinical studies support an effect of ELS on  
57 dopaminergic signaling. We included diverse types and timings of ELS models(Fig 1), and we  
58 operationalized the dopaminergic system by quantifying several biochemical markers in  
59 mice and rats(Fig 2), across brain areas(Fig 3), considering possible confounders.

60 We determined whether the quality of the studies affected the estimation of the results. To  
61 make our knowledge readily available to others, we organized all information in a freely  
62 accessible open-source dataset and created a user-friendly web-app as a tool to guide future

63 (pre)clinical research (e.g. power analysis calculation), thereby avoiding unnecessary  
64 replication and limit animal experimentation.

65

## 66 **2 MATERIALS AND METHODS**

---

67 The review adhered to SYRCLE (Systematic Review Center for Laboratory animal  
68 Experimentation) guidelines for protocol(De Vries et al. 2015), search strategy(Leenaars et al.  
69 2012), and risk of bias assessment(Hooijmans et al. 2014).

### 70 **2.1 THEORETICAL DEFINITIONS AND ASSUMPTIONS**

71 We defined as "*individual comparison*" each test performed within a published study between  
72 a control group and an experimental group with a history of ELS. As often occurs in  
73 experimental studies(Aarts et al. 2014), multiple outcomes (*individual comparisons*) were  
74 collected from the same groups of animals (*nesting*).

75 We defined as "*experiment*" the ensemble of outcome measures from the same animals.  
76 According to this definition, each published study can report multiple experiments when  
77 conducted on different sets of animals. Similarly, experiments conducted on different sets of  
78 animals could potentially be reported in separate publications. For these reasons, we *nested*  
79 multiple individual comparisons belonging to the same animals within the same experiments,  
80 but considered *experiments* from the same publications as independent from each other.

### 81 **2.2 SEARCH STRATEGY**

82 A comprehensive literature search was conducted regarding *the effects of early life stress on*  
83 *biochemical indicators of dopaminergic signaling* on February 14<sup>th</sup> 2017. The search string was  
84 composed by the factors "dopamine", "early life stress" and "rodents" (Fig 1 and  
85 supplementary appendix S1). The search was conducted on the electronic databases PubMed  
86 ([www.pubmed.com](http://www.pubmed.com)) and Web of Science ([www.webofknowledge.com](http://www.webofknowledge.com)). For a flow chart of the  
87 entire methodology, see Fig 4.

88

89 Studies' titles and abstracts were screened, and selected if the inclusion criteria were met  
90 (supplementary Table S2-1). In case of doubt, the full text was inspected. Eligible studies were  
91 evaluated by two independent reviewers (VB and RAS).

92

## 93 **2.3 STUDY CHARACTERISTICS**

### 94 **2.3.1 Selection and data extraction**

95 To limit subjectivity in the data gathering and entry process, data extracted from eligible  
96 studies were recorded in a standardized database (doi:10.17632/9x9fc3v26k.1). The following  
97 information was included: species, strain, sex, type and timing (relative to age) of the ELS  
98 model, outcome, time (relative to age) of outcome, technique used for outcome, brain area  
99 investigated, number of animals used, mean, standard deviation (SD) and standard error of  
100 the mean (SEM). If only SEM was reported, SD was calculated as  $SEM * \sqrt{n}$ , where  $n$  = amount  
101 of animals per group. If number of animals were reported as a range (e.g. 6-8 animals per  
102 group), we used the mean of this number (e.g. 7 animals per group). If a single control group  
103 was used to compare experimental groups in which ELS was induced with different models  
104 (e.g. handling and maternal deprivation), the sample size of the control group was equally  
105 divided as control for each experimental group (e.g.  $n=10$  in not handled control becomes  
106  $n=5$  for control of maternal deprivation and  $n=5$  for control of handling)(Vesterinen et al.  
107 2014).

108 When the data was not reported numerically in the publication, we contacted two authors  
109 per manuscript. If no answer was received within three weeks and after a reminder, the

110 authors were considered not reachable. Only 5 out of 56 contacted authors replied to our  
111 request. Given the low response rate, we estimated most of the data presented only in  
112 graphs with *Ruler for Windows* (<https://a-ruler-for-windows.en.softonic.com/>). We tested the  
113 accuracy of this method by comparing effect sizes calculated from either supplied data or  
114 evaluated with the ruler, and verified that they were highly correlated ( $R^2 = .74$ ,  
115 supplementary Figure S2-1).

116 Concerning metabolites, some papers reported either concentrations, turnovers or both. In  
117 97.5% of cases it was possible to calculate concentrations from turnovers with Pythagoras.  
118 Since concentrations and turnovers are related to the same information (though not  
119 identical), only concentrations were included in the analysis in order to avoid multi-  
120 collinearity. Turnover data-points are available in the MaDEapp (*Meta-Analysis on Dopamine  
121 and Early life stress*) for consultation.

## 122 **2.4 ASSESSMENT OF RISK OF BIAS IN INCLUDED STUDIES**

123 We used the SYRCLE tool to assess the risk of bias (supplementary Table S2-2)(Hooijmans et  
124 al. 2014). The criteria are based on the possible presence of selection bias (items 1, 2 and 3),  
125 performance bias (items 4 and 5), detection bias (items 7, 8, 9) and attrition bias (item 10).  
126 Furthermore, we added the item "*quality of control*" (item 6) to the category performance  
127 bias.

128 Since poor reporting of experimental details plays a role in heightening the quantified risk of  
129 bias, lack of reporting was scored as *unclear* risk of bias.

130 For quantitative inclusion in the analysis, amount of potential bias was operationalized by  
131 summing the risk of bias of each item according to the definition: "yes" = 0, "unclear" = 1,

132 "no" = 2. This produced a continuous variable of integer increment between 0 (no risk bias)  
133 and 20 (maximum risk of bias), which was then scaled ( $mean = 0$ ) to interpret the studies as  
134 of average risk of bias.

## 135 **2.5 DATA SYNTHESIS AND STATISTICAL ANALYSIS**

### 136 **2.5.1 Effect size**

137 We estimated the effect size for each individual comparison with *escalc* (R package *metafor*)  
138 as standardized mean difference with *Hedge's G* method, which includes a correction factor  
139 for small sample sizes(Vesterinen et al. 2014).

### 140 **2.5.2 Study of heterogeneity**

141 Heterogeneity was tested with the Cochran Q-test(Moreira et al. 2016) and  $I^2$   
142 statistics(Cheung 2014b). Study of the distribution of variance was conducted for models  
143 without moderators to determine how much variance could be attributed to differences  
144 between effect sizes within experiments (level 2) and to differences between experiments  
145 (level 3). Substantial distribution of heterogeneity at these levels further encouraged the use  
146 of moderators.

147

### 148 **2.5.3 Model**

149 We used a 3-level mixed effect model, which accounts for the anticipated heterogeneity of  
150 the studies as well as the dependency of effects within experiments. In our experimental  
151 design, the 3 levels correspond to variance of effect size between 1) animals, 2) outcomes  
152 and 3) experiments.



153 Since pre- and post-natal models act on different times of development that are particularly  
154 disparate regarding the array of environmental factors, we considered them as different  
155 datasets and consequently analyzed them separately.

156 Effect sizes were considered outliers if their z score was above +3.29 or below -  
157 3.29(Tabachnick and Fidell 2013), and removed from the analysis.

158 Since we hypothesized that the effect of ELS on DA signaling may not be evident from an  
159 overall estimate, we defined *a priori* possible moderators of this effect. These belonged to  
160 two different categories: biological and technical. The biological moderators were: outcome  
161 measure used (e.g. DA and metabolites), brain area investigated, sex, species, age as a  
162 continuous variable, and whether the outcome was at a RNA level/protein level/functional  
163 (referred to as *method of assessment*). Specific regions within the brain areas were  
164 investigated only in subgroup analysis due to the limited amount of observations. We  
165 considered the type of ELS model and amount of potential bias as technical moderators.  
166 These moderators may not underlie a biological difference, but can nevertheless explain  
167 heterogeneity across studies. The postnatal ELS model 'handling' has been reported  
168 repeatedly to cause effects in the opposite direction to those induced by other ELS  
169 models(Levine 2005). We therefore multiplied each calculated effect size for handling by -1  
170 (Vesterinen et al. 2014), so that the overall estimate would be in the same direction. We  
171 verified that the same conclusions would have been drawn if handling was excluded as a  
172 model (supplementary Figure S2-2).

173 To avoid multicollinearity among moderators, we firstly assessed each biological moderator  
174 univariately. We set the significance level at  $p < .10$  to test whether a moderator significantly  
175 reduced the previously quantified heterogeneity. A less restrictive  $p$ -value was chosen to

176 assure the inclusion of moderators that have a multivariate but not univariate effect(Hox  
177 2010). Only interactions with at least 4 comparisons from 3 different publications from at  
178 least two different laboratories were quantitatively assessed. This explains why some of the  
179 keywords in our search string were not included in the final analysis (Fig 1).

180

#### 181 **2.5.4 Subgroup analysis**

182 As the 3-level models revealed significant heterogeneity, we conducted subgroup analyses to  
183 further investigate its source. In particular, we tested the influence of the technical  
184 moderators (type of ELS model and amount of potential bias) as well as of the brain regions  
185 within the brain areas previously described (Fig 3), in subsets of the dataset with sufficient  
186 observations. For information on the type of ELS model used, please see supplementary  
187 appendix S2-1.

188

#### 189 **2.5.5 Sensitivity analysis and publication bias**

190 According to the standards of meta-analyses, we should investigate the robustness of our  
191 effect sizes by performing analysis only on those studies that were blinded and randomized.  
192 Unfortunately, the amount of blinded and randomized studies was insufficient to proceed  
193 with this approach. As an alternative, we performed the analysis by including the amount of  
194 potential bias as a moderator. The results of this sensitivity analysis should be interpreted as  
195 the effects of ELS on biochemical markers of the dopaminergic system on studies of average  
196 risk of bias.

197 To detect publication bias, funnel plots' asymmetry for each outcome variable was  
198 qualitatively evaluated. To the best of our knowledge, there are no available methods to  
199 quantify missing data (due for example to publication bias) in a multi-level setting(Assink and  
200 Wibbelink 2016). Nonetheless, we evaluated publication bias with Egger's regression(Egger et  
201 al. 1997). However, these results should be interpreted with caution as they are not based on  
202 a 3-level model. Lastly, we excluded those studies responsible for funnel plot asymmetry and  
203 conducted sensitivity analysis on the remaining dataset in the attempt to evaluate the  
204 influence of publication bias in the meta-analysis.

205 Data are presented as *Hedge's G* and 95% C.I. Data analysis was conducted with the computer  
206 program R (version 3.2.3)(Team 2015), with the aid of the following R packages: 1)  
207 *metafor*(Viechtbauer 2010) for conducting the analysis, 2) *ggplot2*(Wickham 2009) for  
208 graphics, and 3) *shiny*(Chang et al. 2017) to create the MaDEapp.

## 209 **3 RESULTS**

---

### 210 **3.1 STUDY SELECTION AND CHARACTERISTICS**

#### 211 **3.1.1 Study selection and data extraction**

212 The process of study selection is illustrated in the flow chart (Fig 4). The search string  
213 identified a total of 979 unique research papers. Statistical measurements (e.g. mean, SD and  
214 N) for quantitative analysis were extracted from 90 peer-reviewed publications ( that met our  
215 pre-specified inclusion criteria as described in the methods section. Three  
216 publications(Arborelius and Eklund 2007; Kippin et al. 2008; Kosten, Zhang, and Kehoe 2005)  
217 were excluded from the analysis as it was not possible to extract nor infer any statistical  
218 measurement. Similarly, information was lacking from 23 comparisons of three other  
219 publications (Kikusui, Faccidomo, and Miczek 2005; Ognibene et al. 2008; Kirsten et al. 2012).

220 The included studies dated between 1996 and 2016, used ~2600 animals yielding a total of  
221 1009 comparisons from 152 experiments. The publications were analyzed in two separate  
222 datasets, respectively using prenatal (41 publications) and postnatal (49 publications) ELS  
223 models. For a summary of experimental characteristics across studies see supplementary  
224 Table S3-1.

225 Four observations of the prenatal dataset (striatal Th (Baier et al. 2014), striatal DA(Basta-Kaim  
226 et al. 2011), striatal HVA(Z. D. Ling et al. 2004), striatal DR2(Son et al. 2007)) and 6  
227 observations of the postnatal dataset (striatal DR1(Y. Zhang et al. 2013), striatal DR2(Y. Zhang  
228 et al. 2015), DAT in the VTA area(Tien et al. 2013), striatal DOPAC(Ognibene et al. 2008),  
229 cortical DA(Matthews et al. 2001) and limbic HVA(Kubesova et al. 2015)) were excluded from  
230 the analysis as outliers.

231 **3.1.2 List of included publications**

232 The publications included in the analysis were:(Adrover et al. 2007; Alonso, Navarro, and  
233 Rodriguez 1994; Baharnoori, Bhardwaj, and Srivastava 2013; Baier et al. 2014; Bakos et al.  
234 2004; Basta-Kaim et al. 2011; Berger et al. 2002; Bingham et al. 2013; Bitanihirwe et al. 2010;  
235 Brenhouse, Lukkes, and Andersen 2013; Cabib, Puglisi-Allegra, and D'Amato 1993; Cai et al.  
236 2013; Camp, Robinson, and Becker 1984; Carboni et al. 2010; Chocyk et al. 2011; Kwok Ho  
237 Christopher Choy, De Visser, and Van Den Buuse 2009; K. H C Choy and van den Buuse 2008;  
238 Cory-Slechta et al. 2009; Cory-slechta et al. 2013; Dallé, Daniels, and Mabandla 2016; Delattre  
239 et al. 2016; L. W. Fan et al. 2011; L.-W. Fan et al. 2011; Gerardin et al. 2005; Gondré-Lewis et al.  
240 2015; Gracia-Rubio et al. 2016; Granholm et al. 2011; Hall et al. 1999; Emily Hensleigh and  
241 Pritchard 2015; E. Hensleigh and Pritchard 2014; Hermel et al. 2001; Hill et al. 2014; J. W.  
242 Jahng et al. 2010; Jeong Won Jahng et al. 2012; Katunar et al. 2010; Kawakami et al. 2013;  
243 Kikusui, Faccidomo, and Miczek 2005; Kirsten et al. 2012; Kubesova et al. 2015; Lazzaretti et  
244 al. 2015; Lejeune et al. 2013; Li et al. 2014; Z. D. Ling et al. 2004; Z. Ling et al. 2004; Z. Ling et  
245 al. 2009; Liu et al. 2016; Lovic et al. 2013; Luchicchi et al. 2016; Madruga et al. 2006; Matthews  
246 et al. 2001; Meyer, Nyffeler, Schwendener, et al. 2008; Meyer, Nyffeler, Yee, et al. 2008; Novak  
247 et al. 2013; Ognibene et al. 2008; Orelan et al. 2011; Ozawa et al. 2006; Pallarés et al. 2013;  
248 Panagiotaropoulos et al. 2004; Pang et al. 2015; Papaioannou et al. 2002; Ploj, Roman, and  
249 Nylander 2003; Rentesi et al. 2013; Reynaert et al. 2016; Reznikov and Nosenko 1995;  
250 Romano-López et al. 2015; Eva Romero et al. 2007; E Romero et al. 2010; Rossi-George et al.  
251 2011; Rots et al. 1996; Sasagawa et al. 2017; Silvagni et al. 2008; Silveira et al. 2010; Son et al.  
252 2007; Tien et al. 2013; Vazquez et al. 2007; Vuillermot et al. 2012; Wang et al. 2009; Weston,  
253 Sobolewski, et al. 2014; Weston, Weston, et al. 2014; Winter et al. 2009; Womersley et al.  
254 2011; Zager, Mennequier, and Palermo-Neto 2012; Zavitsanou et al. 2013; Y. Zhang et al. 2015;

255 X. Y. Zhang, Kehoe, and Kosten 2006; Y. Zhang et al. 2013; X. Zhu et al. 2010; X. Zhu et al.

256 2011; Y. Zhu, Carvey, and Ling 2007; Zuckerman et al. 2003)

257

## 258 **3.2 META-ANALYSIS: PRENATAL ELS**

### 259 **3.2.1 Heterogeneity**

260 Substantial heterogeneity was recorded in the prenatal dataset ( $Q(378) = 954.969, p < .001$ ),  
261 indicating that our search string identified a diverse range of experiments. In particular, 34.7%  
262 of variance could be attributed to within-sampling variance, 18.7% to within-experiment  
263 variance and 46.6% to between-experiment variance. These results suggested the use of  
264 moderators.

### 265 **3.2.2 Moderators**

266 Potential moderators (supplementary Table S3-2) - such as brain area, sex, and species - were  
267 selected prior the beginning of the study based on hypotheses of the ELS literature.

268 As identified with univariate analysis of potential moderators (supplementary Table S3-3),  
269 outcome measure ( $F(7,371) = 3.956, p < .001$ ) and brain area investigated ( $F(4,374) = 6.144,$   
270  $p < .001$ ) were significant moderators in the prenatal dataset, explaining 4.3% and 6% of  
271 variance respectively. There was no detectable moderating effect of sex, species, age used,  
272 and method of assessment (RNA, protein or functional level).

### 273 **3.2.3 Model**

274 The moderators that were univariately identified were included in the 3-level model to  
275 investigate the effects of ELS on markers of dopaminergic signaling. We hypothesized that  
276 the effects were dependent on the outcome analyzed and that they differed across brain  
277 areas.

278 Of the 20 interactions between outcome measure and brain area with enough data-points,  
279 only 2 reached statistical significance (Fig 5). For a summary of all interactions, see

280 supplementary Table S3-4. In particular, in the striatal zone, Th was decreased (*Hedge's G(se)*  
281 =  $-1.164(.295)$ ,  $p < .001$ , supplementary Fig S3-1) while DOPAC was increased (*Hedge's G(se)* =  
282  $.323(.136)$ ,  $p = .018$ , Fig 6A) following prenatal ELS.

283 Fig6B shows a cumulative forest plot of striatal DOPAC to exemplify that the chronological  
284 combining of the experiments shows consistency since 2010, and that subsequent  
285 experiments have not contributed to the direction nor the size of the effect. The cumulative  
286 forest plot does not correct for the multi-level structure of the model.

287 The interaction between outcome measure and brain area explained 22.2% of variance in the  
288 prenatal dataset. We identified 17 interactions with enough comparisons to further address  
289 heterogeneity ( $Q(346) = 742.97$ ,  $p < .001$ ).

290

### 291 **3.2.4 Subgroup analysis**

292 Subgroup analysis was used to further investigate the unexplained heterogeneity deriving  
293 from the 3-level model. The type of ELS model and sub-brain areas were univariately  
294 evaluated as potential moderators for each interaction between outcome measure and brain  
295 area.

296 In the prenatal dataset, 15 interactions had enough observations to be considered for further  
297 subgroup analysis. Of these, 5 had a significant test of ELS model as moderator  
298 (supplementary Table S3-5), namely DOPAC and D1R in the striatal area, DA in the cortical  
299 area, and Th in the VTA area.

300 Subgroup analysis revealed that injection of LPS or PolyI:C has consistently different effects  
301 than maternal restraint. In particular, LPS and PolyI:C significantly increased DOPAC in the



302 striatum (*LPS: Hedge's G(se) = .941(.229), p < .001; PolyI:C: Hedge's G(se) = .608 (.238), p = .016*),  
303 while restraint did not (*Hedge's G(se) = .012(.207), p = .956*, Fig 6A). Conversely, restraint  
304 decreased Th in the VTA area (*Hedge's G(se) = -.85(.348), p = .03*) whilst LPS injection did not  
305 (*LPS: Hedge's G(se) = .026(.188), p = .889*, supplementary Fig S3-2). Concerning cortical DA,  
306 the effects of PolyI:C and restraint had opposite directions but did not reach statistical  
307 significance, whilst the LPS model could not be quantitatively evaluated. Concerning D1R, no  
308 significant effects of the subgroup analyses were recorded.

309 Sub-brain area was a significant moderator only for DA in the striatal area (including nucleus  
310 accumbens, dorsal and central striatum and nucleus caudatus; supplementary Fig S3-3). In  
311 particular, DA was increased in the nucleus accumbens after ELS (*Hedge's G(se) = .392 (.159)*,  
312 *p = .01*) but it was unaffected in other parts of the striatum (*Hedge's G(se) = -.122 (.146), p =*  
313 *.40*). For a summary of all subgroup analyses, see supplementary Table S3-6.

314

### 315 **3.3 META-ANALYSIS: POSTNATAL ELS**

#### 316 **3.3.1 Heterogeneity**

317 Our search identified a diverse range of experiments in the postnatal dataset, as shown by  
318 the substantial heterogeneity recorded ( $Q(381) = 1061.278, p < .001$ ). In particular, 33.1% to  
319 within-sampling, 46.9% to within-experiment, and 20.1% to between-experiment variance.

#### 320 **3.3.2 Moderators**

321 Univariate analysis of potential moderators (supplementary Table S3-7, *p*-value significance  
322 set at  $< .10$ ) identified outcome measure ( $F(8, 373) = 9.139, p < .001$ ) and brain area  
323 investigated ( $F(4,377) = 2.035, p = .089$ ) as significant moderators, explaining 10.3% and 0.8%  
324 of variance respectively. Other moderators, such as species and sex of the animal, had no  
325 detectable moderating effect.

#### 326 **3.3.3 Model**

327 The moderators that were univariately identified were included in the 3-level model to  
328 investigate the effects of ELS on markers of dopaminergic signaling. We hypothesized that  
329 the effects were dependent on the outcome analyzed and that they differed across brain  
330 areas.

331 Of the 17 interactions with sufficient comparisons, 3 reached statistical significance (Fig 7,  
332 supplementary Table S3-8). In particular, in the striatal zone, DOPAC (*Hedge's G*(*se*) =  
333  $.541(.207), p = .009$ , Fig 8), HVA (*Hedge's G*(*se*) =  $.555(.22), p = .012$ , supplementary Fig S3-4)  
334 and DA (*Hedge's G*(*se*) =  $.307(.147), p = .038$ , supplementary Fig S3-5) were increased.

335 The interaction between outcome measure and brain area explained 15.3% of variance in the  
336 postnatal dataset. We identified 16 interactions with enough comparisons to further address  
337 heterogeneity ( $Q(345) = 898.4, p < .001$ ).

338

### 339 **3.3.4 Subgroup analysis**

340 The moderator effects of the ELS model used and sub-brain areas were evaluated with a  
341 subgroup analysis.

342 In the postnatal dataset, 16 interactions had sufficient observations to be further analyzed. Of  
343 these, 7 revealed a significant impact of the ELS model used (supplementary Table S3-9):  
344 HVA, DOPAC and DA in the cortical area, HVA and DOPAC in the striatal area, DOPAC in the  
345 limbic area, and DA in the VTA area.

346 Subgroup analysis showed that the effects of ELS model as moderator in striatal DOPAC (Fig  
347 8) and HVA (supplementary Fig S3-4) were mainly due to handling. In particular, handling  
348 decreased HVA (*Hedge's G*(*se*) =  $-.778(.295)$ ,  $p = .03$ ) as well as DOPAC (*Hedge's G*(*se*) =  $-.77(.301)$ ,  $p = .029$ ) in the striatum, whilst separation of the mother from the pups had no  
349 effect (HVA: *Hedge's G*(*se*) =  $.08(.227)$ ,  $p = .735$ ; DOPAC: *Hedge's G*(*se*) =  $-.205(.239)$ ,  $p = .411$ ).

351 Sub-brain area was not a potential moderator in any of the interactions evaluated.

352 For a summary of all subgroup analyses, see supplementary Table S3-10.

### 353 **3.4 SENSITIVITY ANALYSIS**

354 Sensitivity analysis was conducted to test the robustness of our findings. We examined  
355 whether the quality of the studies included had an impact on the interpretation of our results.

356 **3.4.1 Quality of the studies: SYRCLE bias report**

357 No publication reported information on all SYRCLE potential bias items. Overall, of the 90  
358 publications, 37 (41%) reported randomization sequence of the animals in the experiments, 3  
359 (3.3%) random housing allocation, 59 (65%) random group allocation, 49 (54.4%) random  
360 selection of the animals (Fig 9). In 11 (12%) publications the caretaker were reported blinded  
361 to the experimental condition, in 20 (22.2%) the experimenters blinded. Handling of  
362 incomplete data was reported in 42 publications (46.7%). 11 studies (12.2%) did not report  
363 sufficient information to evaluate the quality of the control group. Only 11 studies yielding a  
364 total of 117 comparisons reported being blinded and randomized.

365

366 **3.4.2 Sensitivity analysis for potential bias**

367 Since the amount of publications was insufficient to evaluate the robustness of our effects in  
368 a blinded and randomized dataset, we operationalized the amount of potential bias and  
369 performed the analysis again by including this factor as a moderator. Therefore, the results of  
370 this sensitivity analysis were interpreted as the effects of ELS on markers of DA signaling on  
371 studies of average bias.

372 The amount of potential bias was a significant moderator in the prenatal dataset ( $F(1, 377) =$   
373  $3.536, p = 0.061$ ); yet, this did not affect the qualitative interpretation of the meta-analysis.

374 In the postnatal dataset, the test of moderators for amount of potential bias was not  
375 significant ( $F(1, 380) = 0.500, p = 0.480$ ). The interpretation of the results did not change, with  
376 the exception of DA in the striatal area, of which the effect size was decreased and the effect  
377 at a trend level ( $Hedge's G(se) = -.289(.15), p = .057$ ).

378

### 379 **3.4.3 Publication bias**

380 Due to the lack of methods to quantitatively evaluate publication bias in a multi-level setting,  
381 we qualitatively estimated the risk for publication bias with funnel plots (Fig 10). Publication  
382 bias was more pronounced in the prenatal than the postnatal dataset. The same conclusion  
383 was reached when performing Egger's regression (no multi-level regression models): there  
384 was evidence for publication bias in the prenatal ( $z = -5.014, p < .001$ ) but not in the  
385 postnatal ( $z = -0.612, p = 0.54$ ) datasets. The presence of publication bias in the prenatal  
386 dataset may indicate an overestimation of the reported effect sizes.

387 Furthermore, we conducted an analysis of influential cases by removing studies with large  
388 standard error as well as residual values. Since the results did not change qualitatively,  
389 publication bias was considered low-to-moderate.

## 390 **3.5 MADEAPP**

391 Finally, we created a MaDEapp ( <https://vbonapersona.shinyapps.io/MaDEapp/> ), a web-  
392 based app with a user-friendly interface in which each researcher can perform his/her own  
393 meta-analysis on the topic of ELS and biochemical indicators of the dopaminergic signaling.  
394 The app offers the possibility to choose across a wide variety of options, such as outcome  
395 measures, brain areas, sex of the animals, type and timing of the ELS model. Based on the  
396 characteristics indicated, the app reports forest, funnel and cumulative plots. The forest plot  
397 includes a 3-level effect estimate (Hedge's G and CI), which can be used for future power  
398 calculation.

399 For example, a researcher is interested in the effects of postnatal ELS on DR1 in the striatal  
400 area. In MaDEapp, the researcher selects the “postnatal” dataset, with “DR1” as outcome  
401 measure in the “striatal area” (Fig. 11). The resulting forest plot reports the estimated *Hedge’s*  
402  $G (CI) = -.5 [-.91, -.1]$ . The estimated effect size is smaller than 0. From this exploration, the  
403 researcher hypothesizes that postnatal ELS decreases DR1 expression in the striatal area. The  
404 effect size -.5 may be an overestimation of the real size of the effect due to potential  
405 (publication) bias. The researcher would then use an effect size of -.45 for power calculation  
406 for his/her future experiments.

407

## 408 **4 DISCUSSION**

---

409 Schizophrenia and addiction are examples of psychiatric disorders reported to be linked to  
410 DA dysfunction. Childhood trauma is a well-documented risk factor (Teicher et al. 2016;  
411 Gatzke-Kopp 2011; Money and Stanwood 2013; Grace 2016). This clinical observation led to  
412 the hypothesis that the dopaminergic system mediates the risk of ELS. Although this link has  
413 been causally investigated in more than 90 rodent publications over 20 years, no consensus  
414 has yet been reached on the extent, directionality and specificity of this effect. Therefore, we  
415 performed a meta-analysis to question: Do rodent studies support long-lasting effects of ELS  
416 on biochemical indicators of the dopaminergic system? Overall, our results indicate that only  
417 a limited number of comparisons were significant suggesting that the effects of ELS on the  
418 dopaminergic system may not be apparent on a biochemical level.

### 419 **4.1 METHODOLOGICAL CONSIDERATIONS**

420 Dopaminergic signaling involves multiple interdependent elements (e.g. precursors,  
421 metabolites, receptors), which altogether contribute to the system as a whole. Data on these  
422 elements are sometimes gathered from the same animals, and are therefore dependent on  
423 each other (Aarts et al. 2014). In a meta-analysis setting, dependency implies overlap of  
424 information, which ultimately leads to an erroneous interpretation of the results (Rosenthal  
425 1991; Van den Noortgate et al. 2013). To deal with this obstacle, several strategies have been  
426 adopted: from selecting only one effect size per study to ignoring the problem  
427 altogether (Cheung 2014b). Although sophisticated methods such as multivariate and  
428 multilevel analysis exist, these have the strong limitation that the needed covariance between  
429 the dependent effects is rarely reported in publications (Hox 2010). The 3-level approach that  
430 we used overcomes both limitations: it corrects for dependency of observations, without the

431 use of covariances(Assink and Wibbelink 2016). To the best of our knowledge, this approach  
432 has never been used before in rodent literature. Although this powerful and practical method  
433 was initially created for human studies(Cheung 2014b), its applicability in preclinical research  
434 is warranted due to the multiple-outcome nature of such studies. The method is already  
435 available in the R packages *metafor* and *metaSEM*.

436 Together with the application of a 3-level mixed effect meta-analysis to preclinical literature,  
437 we here promote the use of tools to facilitate data exploration and advocate open science.  
438 We created MaDEapp, a freely available user-friendly app that allows to run a tailor-made  
439 meta-analysis on ELS and the dopaminergic system, depending on the specific question one  
440 has. Each individual can select a set of characteristics (e.g. prenatal/postnatal models, sex,  
441 age). The app returns a forest plot in which the total univariate 3-level estimate is presented,  
442 as well as a funnel plot to evaluate publication bias. This can be used to generate hypotheses,  
443 evaluate estimated sample sizes for power analysis, and explore which outcomes/brain areas  
444 have received most attention and which did not. We believe this app is a useful tool to guide  
445 future research on the topic.

446 MaDEapp and the analysis here presented are complementary. Meta-analysis is a statistical  
447 test, and it is limited by the frequency (*power*) and quality (*potential bias*) of the published  
448 data. In our analysis there was no significant effect of postnatal ELS on DR1 in the striatum ( $p$   
449 = .053); however, when we analyzed the same outcome univariately with MaDEapp, the  
450 confidence interval of the estimate did not include 0 and could be interpreted as “significant”.  
451 This discrepancy may be due to a lack of power to confirm the effect in our analysis or due to  
452 an increased bias not corrected for in the more specific model used by the app. Therefore,  
453 non-significant results should be interpreted as lack of confirmation of an effect, not as



454 evidence of no effect, since the meta-analysis could be underpowered to detect a specific  
455 marker in a specific brain area. Alongside, the use of the app should be intended as  
456 exploratory only and not as confirmatory.

457

## 458 **4.2 QUALITY OF THE STUDIES**

459 Meta-analysis as a methodology is not simply the collection of statistical methods used to  
460 achieve integration of available evidence. Its power lies in the application of systematic  
461 scientific strategies to the literature review(Cornell and Mulrow 1999). In addition to  
462 summarizing effects' estimates, it allows to evaluate the extent to which conclusions are at  
463 risk of bias.

464 In our analysis, surprisingly few studies (12%) reported being randomized as well as blinded.  
465 On the other hand, random allocation to group (41%) as well as blinded assessor (22.2%) was  
466 comparable(Antonic et al. 2013) or better(Egan, Sena, and Vesterinen 2011) than previous  
467 publications in neuroscience. Although it is likely that investigators did take measures to  
468 reduce bias, lack of their reporting induced an unclear risk(Kilkenny et al. 2013; Landis et al.  
469 2012) and hindered estimation of the value of the publications(Kilkenny et al. 2013). The  
470 importance of quality of reporting has been an emerging issue in preclinical  
471 research(Kilkenny et al. 2013; Landis et al. 2012). Despite the increased awareness, the quality  
472 of reporting of the publications included in this meta-analysis has not improved since 2005  
473 (supplementary Fig S4-1). Such evidence should encourage preclinical researchers as well as  
474 reviewers to adhere to reporting guidelines such as ARRIVE(Kilkenny et al. 2013).

475 Although imprecise reporting does not necessarily imply poor study quality, underpowered  
476 experiments seriously hamper research interpretation(Button et al. 2013). From the reported  
477 amount of animals included per experiment, we back-calculated the power at the beginning  
478 of the study, assuming at least one true positive effect per publication. We performed this  
479 analysis considering small (*Hedge's G* = .5), medium (*Hedge's G* = .8) or large (*Hedge's G* = 1)  
480 effect sizes (supplementary Fig S4-2). When considering a large effect size, 391 comparisons  
481 (38.7%) had power below chance level, and only 63 (6.2%) had power >.8, a cut-off  
482 value(Cohen 1992) generally aimed at in preclinical research. Although 43 papers (47%) had  
483 at least one comparison with power >.5, only 5 papers (5.5%) had at least one comparison  
484 with power >.8. This means that the vast majority of the experiments was not sufficiently  
485 powered to reliably detect an effect – an (already dramatic) best-case scenario given that the  
486 percentages were calculated assuming that the studies compared only two groups (t-tests) as  
487 well as a large and truly existing effect. Future preclinical studies should be grounded in  
488 power calculations based on realistically estimated effects. Although for each single study the  
489 amount of animals will be larger, overall higher power will lead to more reliable, reproducible  
490 and therefore higher quality research.

### 491 **4.3 ELS CAUSES LIMITED ALTERATIONS ON BIOCHEMICAL MARKERS OF THE DA** 492 **SYSTEM**

493 In our analysis, we evaluated the dopaminergic system by including numerous biochemical  
494 markers across brain areas as well as potential moderators. These gave rise to a myriad of  
495 viable comparisons. Despite the extent, only a handful of significant effects were identified,  
496 thereby suggesting that biochemical indicators of the DA system well adapt to ELS  
497 interventions. Clearly, we cannot exclude the possibility that other indicators of the DA

498 system (e.g. electrophysiological parameters or behavioral tests that critically depend on DA  
499 function) would have yielded clearer results. This awaits future investigation.

500 Prenatal and postnatal ELS were treated separately because the prenatal environment differs  
501 substantially from that postnatally. Nonetheless, both datasets shared consistent findings.  
502 Specifically, the striatal area was the most vulnerable: following prenatal ELS, Th was  
503 decreased and DOPAC increased; while postnatal ELS caused an increased in DOPAC as well  
504 as HVA. These changes were stable and reliable: the analysis used is adequately conservative  
505 and robust, and the effects survived sensitivity analysis and publication bias corrections. The  
506 stability of the effects is also qualitatively substantiated by the cumulative plots, which  
507 operationalize how subsequent experiments update our knowledge of the previously  
508 estimated effect size. Our results display that these were durable over time, and that  
509 replication after the initial 3-5 studies might not be very informative on these variables  
510 (except as a positive control in a study investigating another variable), as additional  
511 experiments did not alter the estimated effect. All in all, the sparse effects here reported are  
512 reliable and of medium size, suggesting that the system is damaged, which may in turn  
513 contribute to the vulnerability of ELS-dependent disorders.

514 The results can be interpreted as either hyper- or hypo-activation. For instance, the increase  
515 in metabolites can indicate an increase in the available amount of the substrate DA  
516 (hyperactivation) as well as an increased conversion rate causing less DA (hypoactivation).  
517 Similarly, the decrease in Th (precursor conversion enzyme) is not necessarily indicative of a  
518 decrease in DA function. Although our analysis suggests that postnatal ELS increases DA  
519 levels in the striatum, the effect is small in size and less robust than the other effects  
520 mentioned above. The mismatch between DA precursor and metabolism may suggest

521 changes in the intermediate stage of DA conversion. For example, the DA converting enzyme  
522 COMT has been repeatedly shown to interact with ELS for the later development of  
523 psychiatric disorders(Lovallo et al. 2017; Klaus et al. 2017; Sheikh et al. 2017). On the other  
524 hand, L-DOPA – product of Th and precursor of DA – has been suggested to act as a novel  
525 transmitter itself or may have neurotropic functions, and thereby be transiently involved in  
526 perinatal developmental processes(Braun et al. 1999). Since the interaction between ELS and  
527 L-DOPA has not been further investigated, the link remains circumstantial.

528 We defined *a priori* several factors established in preclinical literature to be potential  
529 moderators of ELS effects. To our surprise, species, sex and method of assessment were not  
530 significant moderators. Although males, mice and protein as method of assessment were the  
531 most described conditions, plenty of observations were present for all groups. Nonetheless,  
532 the lack of evidence for a moderator effect should not be interpreted as evidence for  
533 absence: mice/rats should be chosen according to standard practice, both sexes should  
534 always be considered(Bale and Epperson 2015), and there is substantial evidence that a  
535 decrease in RNA level does not automatically result in a decrease in protein and therefore in  
536 function, as e.g. shown in a systems approach(Williams et al. 2016).

537 Lastly, the unexplained variance may not only indicate methodological differences, but also  
538 underlie additional biological moderators, such as sub-brain areas or differences across  
539 hemispheres (lateralization).

#### 540 **4.4 TRANSLATIONAL POTENTIAL?**

541 The translational applicability of preclinical studies depends on the understanding of  
542 psychopathological clinical and intermediate phenotypes. For example, ELS is a main risk  
543 factor for schizophrenia as well as substance abuse disorder. However, these diseases have

544 opposite intermediate phenotypes: while schizophrenia is supposed to be characterized by  
545 hyperreactivity of the DA system although presumably to its afferent control(Grace 2016),  
546 substance abuse may be linked to DA hypo(re)activation(Wise and Koob 2014). To what  
547 extent do ELS studies in rodents accurately model these two conditions?

548 Three factors currently limit answering this question. Firstly, ELS in humans is a complex  
549 concept, generally involving low socio-economic status, physical and/or psychological abuse,  
550 poor living conditions and high caloric food (Teicher et al. 2016). Conversely, animal models  
551 are extremely controlled and standardized pre- and postnatally. Although this facilitates the  
552 definition of "traumatic early life" as well as the deriving caused effects, one can question its  
553 ecological validity. Secondly, the dual hypo- / hyper- interpretation of the ELS-induced  
554 phenotype in rodents prevents a whole-system level comparison, and restricts it to a micro  
555 level, focusing on a particular compound in a particular brain area. Thirdly, the DA-dependent  
556 changes in schizophrenia and addiction are most likely far more complex than the ones  
557 observed following ELS in rodents. For example, our analysis failed to confirm any effect of  
558 ELS on DA receptors. This was surprising, as changes in the availability of DA receptors is a  
559 consistent characteristic across different types of addictions(Nutt et al. 2015) as well as in  
560 schizophrenia(Sanyal and Van Tol 1997). Although the discrepancy could partly be due to a  
561 power problem of the meta-analysis, these limitations challenge the reliability of ELS models  
562 for translational purposes, at least with regard to these specific aspects of the  
563 abovementioned human disorders. It cannot be excluded that more relevant models may  
564 become apparent in light of different ELS theories(Daskalakis et al. 2013).

565 Lastly, although our study supports that ELS causes some changes in the DA system, these  
566 associations remain at a correlational level in humans and should be interpreted as such.

567

#### 568 **4.5 LIMITATIONS OF THE STUDY**

569 Despite our efforts to be as comprehensive as possible in the description of the effects of ELS  
570 on the DA system, we encountered several important limitations. Firstly, we investigated the  
571 DA system by evaluating the effects of ELS on biochemical markers. Although this provides a  
572 thorough conceptualization of the system, it does not supply a comprehensive functional  
573 evaluation. For example, the approach here reported is unable to operationalize DA  
574 innervations, projections and tone. ELS has been reported to alter DR3-signalling and  
575 neuronal activity in the lateral septum(Shin et al. 2018). Chronic stress in adulthood has been  
576 reported to change DA neurons' activity in a stressor-dependent manner(Valenti, Gill, and  
577 Grace 2012). These reports suggest that spontaneous activity, bursting and timing of  
578 dopaminergic firing may be susceptible to ELS action, yet they are not apparent from  
579 assessment of ligands, receptors and metabolites. Despite the high relevance of such  
580 measurements, these were excluded from the analysis as the publications on the topic are  
581 scarce and their integration not straightforward in a meta-analytic setting.

582 Secondly, the classification of "timing" of ELS to either prenatal or postnatal may be too  
583 reductionist, since neuronal circuits are shaped by experiences during critical periods of  
584 development of variable length (from days to years depending on the species) (Hensch  
585 2005). The interested researcher can further explore this avenue by combining our dataset  
586 with RNA expression of Th or DA receptors found in the Allen Developing Mouse Brain  
587 Atlas(Thompson et al. 2014). Unfortunately, the literature so far published is insufficient to  
588 investigate how stress during specific postnatal days in which a certain RNA *X* is highly  
589 expressed uniquely alters its functioning later in life.

590 Thirdly, due to insufficient data-points per outcome per brain area in several cases, a  
591 meaningful quantitative estimation was not possible for all combinations of outcome\*area.  
592 All currently available measurements are reported as supplementary material and can be  
593 further investigated via MaDEapp.

594 Fourthly, we included data only from published studies. Especially in the prenatal dataset,  
595 there is evidence of low-to-medium publication bias as qualitatively estimated with a funnel  
596 plot and sensitivity analysis, which may result in an overestimation of the effect sizes. Despite  
597 the robustness of our methodology, this limitation should be considered in future power  
598 calculations.

599 Lastly, we limited our analysis to baseline (i.e. unchallenged) conditions. Future studies should  
600 focus on conditions where the DA system is challenged, as ELS manipulations can interact  
601 with later life challenges to result in a pathological phenotype(Daskalakis et al. 2013).

602

603 To conclude, ELS induces a few yet robust effects on biochemical indicators of the DA system,  
604 with – based on the currently available studies – the striatum being the brain area most  
605 affected. Although the changes observed can be interpreted as both hypo- and hyper-  
606 activation of the DA system, the effects were consistent across prenatal and postnatal ELS  
607 models, sex, species and method of assessment.

## 608 **5 ACKNOWLEDGMENTS**

---

609 This work was supported by the Consortium on Individual Development (CID), which is  
610 funded through the Gravitation program of the Dutch Ministry of Education, Culture, and  
611 Science and Netherlands Organization for Scientific Research (NWO grant number  
612 024.001.003). R.A.S. was supported Netherlands Organization for Scientific Research (NWO  
613 Veni grant 863.13.02).

614 We thank Prof. Joop Hox for his input on multilevel methods, and Erik-Jan van Kesteren for  
615 his programming expertise. We also gratefully acknowledge the in depth discussions and  
616 feedback on the methods by Prof. Herbert Hoijtink and Dr Remmelt Schür.

617



## 618 **6 REFERENCES**

---

- 619 Aarts, Emmeke, Matthijs Verhage, Jesse V Veenvliet, Conor V Dolan, and Sophie van der Sluis.  
620 2014. "A Solution to Dependency: Using Multilevel Analysis to Accommodate Nested  
621 Data." *Nature Neuroscience* 17 (4): 491–96. doi:10.1038/nn.3648.
- 622 Adrover, Ezequiela, María Alejandra Berger, Adriana A. Pérez, Frank I. Tarazi, and Marta C.  
623 Antonelli. 2007. "Effects of Prenatal Stress on Dopamine D2 Receptor Asymmetry in Rat  
624 Brain." *Synapse* 61 (6): 459–62. doi:10.1002/syn.20389.
- 625 Agid, O, B Shapira, J Zislin, M Ritsner, B Hanin, H Murad, T Troudart, M Bloch, U Heresco-Levy,  
626 and B Lerer. 1999. "Environment and Vulnerability to Major Psychiatric Illness: A Case  
627 Control Study of Early Parental Loss in Major Depression, Bipolar Disorder and  
628 Schizophrenia [See Comments]." *Molecular Psychiatry* 4 (2): 163–72.  
629 doi:10.1038/sj.mp.4000473.
- 630 Alonso, S. J., E. Navarro, and M. Rodriguez. 1994. "Permanent Dopaminergic Alterations in the  
631 n. Accumbens after Prenatal Stress." *Pharmacology, Biochemistry and Behavior* 49 (2):  
632 353–58. doi:10.1016/0091-3057(94)90433-2.
- 633 Antonic, Ana, Emily S. Sena, Jennifer S. Lees, Taryn E. Wills, Peta Skeers, Peter E. Batchelor,  
634 Malcolm R. Macleod, and David W. Howells. 2013. "Stem Cell Transplantation in  
635 Traumatic Spinal Cord Injury: A Systematic Review and Meta-Analysis of Animal Studies."  
636 *PLoS Biology* 11 (12). doi:10.1371/journal.pbio.1001738.
- 637 Arborelius, L., and M. B. Eklund. 2007. "Both Long and Brief Maternal Separation Produces  
638 Persistent Changes in Tissue Levels of Brain Monoamines in Middle-Aged Female Rats."  
639 *Neuroscience* 145 (2): 738–50. doi:10.1016/j.neuroscience.2006.12.007.
- 640 Assink, Mark, and Carlijn J. M. Wibbelink. 2016. "Fitting Three-Level Meta-Analytic Models in  
641 R: A Step-by-Step Tutorial." *The Quantitative Methods for Psychology* 12 (3): 154–74.  
642 doi:10.20982/tqmp.12.3.p154.
- 643 Baharnoori, Moogeh, Sanjeev K. Bhardwaj, and Lalit K. Srivastava. 2013. "Effect of Maternal  
644 Lipopolysaccharide Administration on the Development of Dopaminergic Receptors and  
645 Transporter in the Rat Offspring." *PLoS ONE* 8 (1): 18–23.  
646 doi:10.1371/journal.pone.0054439.
- 647 Baier, Carlos J., María Eugenia Pallarés, Ezequiela Adrover, María R. Katunar, Rita Raisman-  
648 Vozari, and Marta C. Antonelli. 2014. "Intrastratial 6-OHDA Lesion Differentially Affects  
649 Dopaminergic Neurons in the Ventral Tegmental Area of Prenatally Stressed Rats."  
650 *Neurotoxicity Research* 26 (3): 274–84. doi:10.1007/s12640-014-9479-7.
- 651 Bakos, Jan, Roman Duncko, Aikaterini Makatsori, Zdeno Pirnik, Alexander Kiss, and Daniela  
652 Jezova. 2004. "Prenatal Immune Challenge Affects Growth, Behavior, and Brain  
653 Dopamine in Offspring." *Annals of the New York Academy of Sciences* 1018: 281–87.  
654 doi:10.1196/annals.1296.033.
- 655 Bale, Tracy L, and C Neill Epperson. 2015. "Sex Differences and Stress across the Lifespan."  
656 *Nature Neuroscience* 18 (10): 1413–20. doi:10.1038/nn.4112.

- 657 Basta-Kaim, A., K. Fijał, B. Budziszewska, M. Regulska, M. Leśkiewicz, M. Kubera, K.  
658 Gołombiowska, W. Lasoń, and K. Wędzony. 2011. "Prenatal Lipopolysaccharide  
659 Treatment Enhances MK-801-Induced Psychotomimetic Effects in Rats." *Pharmacology  
660 Biochemistry and Behavior* 98 (2): 241–49. doi:10.1016/j.pbb.2010.12.026.
- 661 Berger, M A, V G Barros, M I Sarchi, F I Tarazi, and M C Antonelli. 2002. "Long-Term Effects of  
662 Prenatal Stress on Dopamine and Glutamate Receptors in Adult Rat Brain." *Neurochem  
663 Res* 27 (11): 1525–33. <http://www.ncbi.nlm.nih.gov/pubmed/12512957>.
- 664 Bingham, Brian C., C. S. Sheela Rani, Alan Frazer, Randy Strong, and David A. Morilak. 2013.  
665 "Exogenous Prenatal Corticosterone Exposure Mimics the Effects of Prenatal Stress on  
666 Adult Brain Stress Response Systems and Fear Extinction Behavior." *Psychoneuroendocrinology*  
667 38 (11). Elsevier Ltd: 2746–57.  
668 doi:10.1016/j.psyneuen.2013.07.003.
- 669 Bitanhirwe, Byron K Y, Daria Peleg-Raibstein, Forouhar Mouttet, Joram Feldon, and Urs  
670 Meyer. 2010. "Late Prenatal Immune Activation in Mice Leads to Behavioral and  
671 Neurochemical Abnormalities Relevant to the Negative Symptoms of Schizophrenia." *Neuropsychopharmacology*  
672 35 (12). Nature Publishing Group: 2462–78.  
673 doi:10.1038/npp.2010.129.
- 674 Braun, K., E. Lange, M. Metzger, and G. Poeggel. 1999. "Maternal Separation Followed by Early  
675 Social Deprivation Affects the Development of Monoaminergic Fiber Systems in the  
676 Medial Prefrontal Cortex of Octodon Degus." *Neuroscience* 95 (1): 309–18.  
677 doi:10.1016/S0306-4522(99)00420-0.
- 678 Brenhouse, Heather, Jodi Lukkes, and Susan Andersen. 2013. "Early Life Adversity Alters the  
679 Developmental Profiles of Addiction-Related Prefrontal Cortex Circuitry." *Brain Sciences*  
680 3 (1): 143–58. doi:10.3390/brainsci3010143.
- 681 Button, Katherine S., John P. A. Ioannidis, Claire Mokrysz, Brian A. Nosek, Jonathan Flint,  
682 Emma S. J. Robinson, and Marcus R. Munafò. 2013. "Power Failure: Why Small Sample  
683 Size Undermines the Reliability of Neuroscience." *Nature Reviews Neuroscience* 14 (5).  
684 Nature Publishing Group: 365–76. doi:10.1038/nrn3475.
- 685 Cabib, Simona, Stefano Puglisi-Allegra, and Francesca R. D'Amato. 1993. "Effects of Postnatal  
686 Stress on Dopamine Mesolimbic System Responses to Aversive Experiences in Adult  
687 Life." *Brain Research* 604 (1–2): 232–39. doi:10.1016/0006-8993(93)90374-V.
- 688 Cai, Zhengwei, Lir-wan Fan, Asuka Kaizaki, Lu-tai Tien, Tangeng Ma, Yi Pang, Shuying Lin, Rick  
689 C.S. Lin, and Kimberly L Simpson. 2013. "Neonatal Systemic Exposure to  
690 Lipopolysaccharide Enhances Susceptibility of Nigrostriatal Dopaminergic Neurons to  
691 Rotenone Neurotoxicity in Later Life." *Developmental Neuroscience* 35 (2–3): 155–71.  
692 doi:10.1159/000346156.
- 693 Camp, D M, T E Robinson, and J B Becker. 1984. "Sex-Differences in the Effects of Early  
694 Experience on the Development of Behavioral and Brain Asymmetries in Rats." *Physiology & Behavior*  
695 33 (3): 433–39. doi:10.1016/0031-9384(84)90166-5.
- 696 Carboni, E., V. G. Barros, M. Ibba, A. Silvagni, C. Mura, and M. C. Antonelli. 2010. "Prenatal  
697 Restraint Stress: An in Vivo Microdialysis Study on Catecholamine Release in the Rat

- 698 Prefrontal Cortex." *Neuroscience* 168 (1). Elsevier Inc.: 156–66.  
699 doi:10.1016/j.neuroscience.2010.03.046.
- 700 Chang, Wiston, Joe Cheng, JJ Allaire, Yihui Xie, and Jonathan McPherson. 2017. "Shiny: Web  
701 Application Framework for R." <https://cran.r-project.org/package=shiny>.
- 702 Cheung, Mike W.L. 2014a. "MetaSEM: An R Package for Meta-Analysis Using Structural  
703 Equation Modeling." *Frontiers in Psychology* 5 (OCT): 1–7. doi:10.3389/fpsyg.2014.01521.
- 704 ———. 2014b. "Modeling Dependent Effect Sizes with Three-Level Meta-Analyses: A  
705 Structural Equation Modeling Approach." *Psychological Methods* 19 (2): 211–29.  
706 doi:10.1037/a0032968.
- 707 Chocyk, A., A. Przyborowska, D. Dudys, I. Majcher, M. Ma??kowiak, and K. Wedzony. 2011.  
708 "The Impact of Maternal Separation on the Number of Tyrosine Hydroxylase-Expressing  
709 Midbrain Neurons during Different Stages of Ontogenesis." *Neuroscience* 182: 43–61.  
710 doi:10.1016/j.neuroscience.2011.03.008.
- 711 Choy, K. H C, and Maarten van den Buuse. 2008. "Attenuated Disruption of Prepulse  
712 Inhibition by Dopaminergic Stimulation after Maternal Deprivation and Adolescent  
713 Corticosterone Treatment in Rats." *European Neuropsychopharmacology* 18 (1): 1–13.  
714 doi:10.1016/j.euroneuro.2007.03.011.
- 715 Choy, Kwok Ho Christopher, Yvonne P. De Visser, and Maarten Van Den Buuse. 2009. "The  
716 Effect of 'two Hit' Neonatal and Young-Adult Stress on Dopaminergic Modulation of  
717 Prepulse Inhibition and Dopamine Receptor Density." *British Journal of Pharmacology*  
718 156 (2): 388–96. doi:10.1111/j.1476-5381.2008.00008.x.
- 719 Cohen, Jacob. 1992. "A Power Primer." *Psychological Bulletin* 112 (1): 155–59.  
720 doi:10.1037/0033-2909.112.1.155.
- 721 Cornell, J, and C Mulrow. 1999. *Meta-Analysis*. Edited by H J Ader and G J Mellenberg.  
722 London: Sage.
- 723 Cory-Slechta, D. A., M. B. Virgolini, A. Rossi-George, D. Weston, and M. Thiruchelvam. 2009.  
724 "Experimental Manipulations Blunt Time-Induced Changes in Brain Monoamine Levels  
725 and Completely Reverse Stress, but Not Pb+/-Stress-Related Modifications to These  
726 Trajectories." *Behavioural Brain Research* 205 (1): 76–87. doi:10.1016/j.bbr.2009.06.040.
- 727 Cory-slechta, Deborah A., Douglas Weston, Sue Liu, and Joshua L. Allen. 2013. "Brain  
728 Hemispheric Differences in the Neurochemical Effects of Lead, Prenatal Stress, and the  
729 Combination and Their Amelioration by Behavioral Experience." *Toxicological Sciences*  
730 132 (2): 419–30. doi:10.1093/toxsci/kft015.
- 731 Dallé, Ernest, Willie M.U. Daniels, and Musa V. Mabandla. 2016. "Anti-Parkinsonian Effects of  
732 Fluvoxamine Maleate in Maternally Separated Rats." *International Journal of  
733 Developmental Neuroscience* 53. International Society for Developmental Neuroscience:  
734 26–34. doi:10.1016/j.ijdevneu.2016.06.004.
- 735 Daskalakis, Nikolaos P., Rosemary C. Bagot, Karen J. Parker, Christiaan H. Vinkers, and E.R. de  
736 Kloet. 2013. "The Three-Hit Concept of Vulnerability and Resilience: Toward

- 737 Understanding Adaptation to Early-Life Adversity Outcome." *Psychoneuroendocrinology*  
738 38 (9): 1858–73. doi:10.1016/j.psyneuen.2013.06.008.
- 739 De Vries, Rob B.M., Carlijn R. Hooijmans, Miranda W. Langendam, Marlies Leenaars, Merel  
740 Ritskes-Hoitinga, and Kimberley E. Wever. 2015. "A Protocol Format for the Preparation,  
741 Registration and Publication of Systematic Reviews of Animal Intervention Studies."  
742 *Evidence-Based Preclinical Medicine* 1 (1): 1–9. doi:10.1002/ebm2.7.
- 743 Delattre, Ana Marcia, Bruno Carabelli, Marco Aur??lio Mori, Paula G. Kempe, Luiz E. Rizzo de  
744 Souza, Silvio M. Zanata, Ricardo B. Machado, et al. 2016. "Maternal Omega-3  
745 Supplement Improves Dopaminergic System in Pre- and Postnatal Inflammation-  
746 Induced Neurotoxicity in Parkinson???S Disease Model." *Molecular Neurobiology*, 1–17.  
747 doi:10.1007/s12035-016-9803-8.
- 748 Dube, Shanta R, Vincent J Felitti, Maxia Dong, Daniel P Chapman, Wayne H Giles, and Robert  
749 F Anda. 2003. "Childhood Abuse , Neglect , and Household Dysfunction and the Risk of  
750 Illicit Drug Use: The Adverse Childhood Experiences Study" 111 (3).  
751 doi:10.1542/peds.111.3.564.
- 752 Egan, K. J., E. S. Sena, and H. M. Vesterinen. 2011. "Making the Most of Animal Data -  
753 Improving the Prospect of Success in Pragmatic Trials in the Neurosciences." *Trials* 12  
754 (Suppl 1). BioMed Central Ltd: no pagination. doi:10.1186/1745-6215-12-S1-A102.
- 755 Egger, M., G Davey Smith, M Schneider, and C Minder. 1997. "Bias in Meta-Analysis Detected  
756 by a Simple, Graphical Test." *BMJ (Clinical Research Ed.)* 315 (7109): 629–34.  
757 doi:10.1136/bmj.316.7129.469.
- 758 Enoch, Mary-Anne. 2011. "The Role of Early Life Stress as a Predictor for Alcohol and Drug  
759 Dependence." *Psychopharmacology* 214 (1): 17–31. doi:10.1007/s00213-010-1916-6.
- 760 Fan, Lir-Wan, Lu-Tai Tien, Baoying Zheng, Yi Pang, Rick C S Lin, Kimberly L Simpson, Tangeng  
761 Ma, Philip G Rhodes, and Zhengwei Cai. 2011. "Dopaminergic Neuronal Injury in the  
762 Adult Rat Brain Following Neonatal Exposure to Lipopolysaccharide and the Silent  
763 Neurotoxicity." *Brain, Behavior, and Immunity* 25 (2). Elsevier Inc.: 286–97.  
764 doi:10.1016/j.bbi.2010.09.020.
- 765 Fan, Lir Wan, Lu Tai Tien, Rick C S Lin, Kimberly L. Simpson, Philip G. Rhodes, and Zhengwei  
766 Cai. 2011. "Neonatal Exposure to Lipopolysaccharide Enhances Vulnerability of  
767 Nigrostriatal Dopaminergic Neurons to Rotenone Neurotoxicity in Later Life."  
768 *Neurobiology of Disease* 44 (3). Elsevier Inc.: 304–16. doi:10.1016/j.nbd.2011.07.011.
- 769 Gatzke-Kopp, Lisa M. 2011. "The Canary in the Coalmine: The Sensitivity of Mesolimbic  
770 Dopamine to Environmental Adversity during Development." *Neuroscience and  
771 Biobehavioral Reviews* 35 (3). Elsevier Ltd: 794–803. doi:10.1016/j.neubiorev.2010.09.013.
- 772 Gerardin, Daniela C C, Oduvaldo C M Pereira, Wilma G. Kempinas, Jorge C. Florio, Estef??nia  
773 G. Moreira, and Maria M. Bernardi. 2005. "Sexual Behavior, Neuroendocrine, and  
774 Neurochemical Aspects in Male Rats Exposed Prenatally to Stress." *Physiology and  
775 Behavior* 84 (1): 97–104. doi:10.1016/j.physbeh.2004.10.014.
- 776 Gondré-Lewis, Marjorie C., Philippe J. Darius, Hong Wang, and Joanne S. Allard. 2015.

- 777 "Stereological Analyses of Reward System Nuclei in Maternally Deprived/Separated  
778 Alcohol Drinking Rats." *Journal of Chemical Neuroanatomy*, no. 2015. Elsevier B.V.  
779 doi:10.1016/j.jchemneu.2016.02.004.
- 780 Grace, Anthony A. 2016. "Dysregulation of the Dopamine System in the Pathophysiology of  
781 Schizophrenia and Depression." *Nature Reviews Neuroscience* 17 (8). Nature Publishing  
782 Group: 524–32. doi:10.1038/nrn.2016.57.
- 783 Gracia-Rubio, Irene, Olga Valverde, Elena Martinez-Laorden, Maria Moscoso-Castro, M.  
784 Victoria Milanés, and M. Luisa Laorden. 2016. "Maternal Separation Impairs Cocaine-  
785 Induced Behavioural Sensitization in Adolescent Mice." *Plos One* 11 (12): e0167483.  
786 doi:10.1371/journal.pone.0167483.
- 787 Granholm, Ann Charlotte, Vandana Zaman, Jennifer Godbee, Michael Smith, Riad Ramadan,  
788 Claudia Umphlet, Patrick Randall, et al. 2011. "Prenatal LPS Increases Inflammation in the  
789 Substantia Nigra of Gdnf Heterozygous Mice." *Brain Pathology* 21 (3): 330–48.  
790 doi:10.1111/j.1750-3639.2010.00457.x.
- 791 Hall, F. S., L. S. Wilkinson, T. Humby, and T. W. Robbins. 1999. "Maternal Deprivation of  
792 Neonatal Rats Produces Enduring Changes in Dopamine Function." *Synapse* 32 (1): 37–  
793 43. doi:10.1002/(SICI)1098-2396(199904)32:1<37::AID-SYN5>3.0.CO;2-4.
- 794 Hensch, Takao K. 2005. "Critical Period Plasticity in Local Cortical Circuits." *Nature Reviews*  
795 *Neuroscience* 6 (11): 877–88. doi:10.1038/nrn1787.
- 796 Hensleigh, E., and L. M. Pritchard. 2014. "The Effect of Early Environmental Manipulation on  
797 Locomotor Sensitivity and Methamphetamine Conditioned Place Preference Reward."  
798 *Behavioural Brain Research* 268. Elsevier B.V.: 66–71. doi:10.1016/j.bbr.2014.03.045.
- 799 Hensleigh, Emily, and Laurel M. Pritchard. 2015. "Maternal Separation Increases  
800 Methamphetamine-Induced Damage in the Striatum in Male, but Not Female Rats."  
801 *Behavioural Brain Research* 295. Elsevier B.V.: 3–8. doi:10.1016/j.bbr.2014.12.008.
- 802 Hermel, E. E S, G. S. Severino, A. L. Ceconello, F. M. Pereira, G. L. Sanvitto, and A. B. Lucion.  
803 2001. "Neonatal Handling and the Expression of Immunoreactivity to Tyrosine  
804 Hydroxylase in the Hypothalamus of Adult Male Rats." *Brazilian Journal of Medical and*  
805 *Biological Research* 34 (9): 1191–95.
- 806 Hill, Rachel A., Szerenke Kiss Von Soly, Udani Ratnayake, Maren Klug, Michele D. Binder,  
807 Anthony J. Hannan, and Maarten van den Buuse. 2014. "Long-Term Effects of Combined  
808 Neonatal and Adolescent Stress on Brain-Derived Neurotrophic Factor and Dopamine  
809 Receptor Expression in the Rat Forebrain." *Biochimica et Biophysica Acta - Molecular*  
810 *Basis of Disease* 1842 (11). Elsevier B.V.: 2126–35. doi:10.1016/j.bbdis.2014.08.009.
- 811 Hooijmans, Carlijn R, Maroeska M Rovers, Rob B M De Vries, Marlies Leenaars, Merel Ritskes-  
812 hoitinga, and Miranda W Langendam. 2014. "SYRCLE ' s Risk of Bias Tool for Animal  
813 Studies." *BMC Medical Research Methodology* 14 (1). BMC Medical Research  
814 Methodology: 1–9. doi:10.1186/1471-2288-14-43.
- 815 Hox, Joop J. 2010. *Multilevel Analysis: Techniques and Applications*. Second edi. New York, NY:  
816 Routledge.

- 817 Jahng, J. W., V. Ryu, S. B. Yoo, S. J. Noh, J. Y. Kim, and J. H. Lee. 2010. "Mesolimbic  
818 Dopaminergic Activity Responding to Acute Stress Is Blunted in Adolescent Rats That  
819 Experienced Neonatal Maternal Separation." *Neuroscience* 171 (1). Elsevier Inc.: 144–52.  
820 doi:10.1016/j.neuroscience.2010.08.063.
- 821 Jahng, Jeong Won, Sang Bae Yoo, Jin Young Kim, Bom Taek Kim, and Jong Ho Lee. 2012.  
822 "Increased Mesohippocampal Dopaminergic Activity and Improved Depression-like  
823 Behaviors in Maternally Separated Rats Following Repeated Fasting/Refeeding Cycles."  
824 *Journal of Obesity* 2012. doi:10.1155/2012/497101.
- 825 Katunar, Maria R., Trinidad Saez, Alicia Brusco, and Marta C. Antonelli. 2010. "Ontogenetic  
826 Expression of Dopamine-Related Transcription Factors and Tyrosine Hydroxylase in  
827 Prenatally Stressed Rats." *Neurotoxicity Research* 18 (1): 69–81. doi:10.1007/s12640-009-  
828 9132-z.
- 829 Kawakami, S. E., I. M H Quadros, R. B. Machado, and D. Suchecki. 2013. "Sex-Dependent  
830 Effects of Maternal Separation on Plasma Corticosterone and Brain Monoamines in  
831 Response to Chronic Ethanol Administration." *Neuroscience* 253. IBRO: 55–66.  
832 doi:10.1016/j.neuroscience.2013.08.031.
- 833 Keller-Wood, Maureen. 2015. "Hypothalamic-Pituitary-Adrenal Axis-Feedback Control."  
834 *Comprehensive Physiology* 5 (July): 1161–82. doi:10.1002/cphy.c140065.
- 835 Kikusui, Takefumi, Sara Faccidomo, and Klaus A. Miczek. 2005. "Repeated Maternal  
836 Separation: Differences in Cocaine-Induced Behavioral Sensitization in Adult Male and  
837 Female Mice." *Psychopharmacology* 178 (2–3): 202–10. doi:10.1007/s00213-004-1989-1.
- 838 Kilkenny, Carol, William J. Browne, Innes C. Cuthill, Michael Emerson, and Douglas G. Altman.  
839 2013. "Improving Bioscience Research Reporting: The Arrive Guidelines for Reporting  
840 Animal Research." *Animals* 4 (1): 35–44. doi:10.3390/ani4010035.
- 841 Kippin, Tod E, Karen K Szumlinski, Zuzana Kapasova, Betsy Rezner, and Ronald E See. 2008.  
842 "Prenatal Stress Enhances Responsiveness to Cocaine." *Neuropsychopharmacology:  
843 Official Publication of the American College of Neuropsychopharmacology* 33 (4): 769–82.  
844 doi:10.1038/sj.npp.1301447.
- 845 Kirsten, Thiago B., Gabriela P. Chaves-Kirsten, Lucas M. Chaible, Ana C. Silva, Daniel O.  
846 Martins, Luiz R G Britto, Maria L Z Dagli, Andrea S. Torrão, João Palermo-Neto, and Maria  
847 M. Bernardi. 2012. "Hypoactivity of the Central Dopaminergic System and Autistic-like  
848 Behavior Induced by a Single Early Prenatal Exposure to Lipopolysaccharide." *Journal of  
849 Neuroscience Research* 90 (10): 1903–12. doi:10.1002/jnr.23089.
- 850 Klaus, Kristel, Kevin Butler, Simon J. Durrant, Manir Ali, Chris F. Inglehearn, Timothy L.  
851 Hodgson, Humberto Gutierrez, and Kyla Pennington. 2017. "The Effect of COMT  
852 Val158Met and DRD2 C957T Polymorphisms on Executive Function and the Impact of  
853 Early Life Stress." *Brain and Behavior* 7 (5): 1–12. doi:10.1002/brb3.695.
- 854 Kosten, Therese A, Xiang Yang Zhang, and Priscilla Kehoe. 2005. "Neurochemical and  
855 Behavioral Responses to Cocaine in Adult Male Rats with Neonatal Isolation Experience."  
856 *The Journal of Pharmacology and Experimental Therapeutics* 314 (2): 661–67.  
857 doi:10.1124/jpet.104.081216.

- 858 Kubesova, Anna, Hana Tejkalova, Kamila Syslova, Petr Kacer, Jana Vondrousova, Filip Tyls,  
859 Michaela Fujakova, Tomas Palenicek, and Jiri Horacek. 2015. "Biochemical,  
860 Histopathological and Morphological Profiling of a Rat Model of Early Immune  
861 Stimulation: Relation to Psychopathology." *PLoS ONE* 10 (1): 1–16.  
862 doi:10.1371/journal.pone.0115439.
- 863 Landis, Story C., Susan G. Amara, Khusru Asadullah, Chris P. Austin, Robi Blumenstein, Eileen  
864 W. Bradley, Ronald G. Crystal, et al. 2012. "A Call for Transparent Reporting to Optimize  
865 the Predictive Value of Preclinical Research." *Nature* 490 (7419). Nature Publishing  
866 Group: 187–91. doi:10.1038/nature11556.
- 867 Lazzaretti, Camilla, Grasielle Clotildes Kincheski, Pablo Pandolfo, and Natividade De S. 2015.  
868 "Neonatal Handling Causes Impulsive Behavior and Decreased Pharmacological  
869 Response to Methylphenidate in Male Adult Wistar Rats." *Journal of Integrative  
870 Neuroscience* 14 (4): 1–15. doi:10.1142/S0219635216500047.
- 871 Leenaars, M., C. R. Hooijmans, N. van Veggel, G. ter Riet, M. Leeflang, L. Hooft, G. J. van der  
872 Wilt, a. Tillema, and M. Ritskes-Hoitinga. 2012. "A Step-by-Step Guide to Systematically  
873 Identify All Relevant Animal Studies." *Laboratory Animals* 46 (1): 24–31.  
874 doi:10.1258/la.2011.011087.
- 875 Lejeune, Stéphanie, Nathalie Dourmap, Marie-Pascale Martres, Bruno Giros, Valérie Daugé,  
876 and Laurent Naudon. 2013. "The Dopamine D1 Receptor Agonist SKF 38393 Improves  
877 Temporal Order Memory Performance in Maternally Deprived Rats." *Neurobiology of  
878 Learning and Memory* 106 (November): 268–73. doi:10.1016/j.nlm.2013.10.005.
- 879 Levine, Seymour. 2005. "Developmental Determinants of Sensitivity and Resistance to Stress."  
880 *Psychoneuroendocrinology* 30 (10): 939–46. doi:10.1016/j.psyneuen.2005.03.013.
- 881 Li, Wai Yu, Yi Chun Chang, L. Jyuhn Hsiarn Lee, and Li Jen Lee. 2014. "Prenatal Infection  
882 Affects the Neuronal Architecture and Cognitive Function in Adult Mice." *Developmental  
883 Neuroscience* 36 (5): 359–70. doi:10.1159/000362383.
- 884 Ling, Z. D., Q. Chang, J. W. Lipton, C. W. Tong, T. M. Landers, and P. M. Carvey. 2004.  
885 "Combined Toxicity of Prenatal Bacterial Endotoxin Exposure and Postnatal 6-  
886 Hydroxydopamine in the Adult Rat Midbrain." *Neuroscience* 124 (3): 619–28.  
887 doi:10.1016/j.neuroscience.2003.12.017.
- 888 Ling, Zaodung, Qin A. Chang, Chong Wai Tong, Susan E. Leurgans, Jack W. Lipton, and Paul  
889 M. Carvey. 2004. "Rotenone Potentiates Dopamine Neuron Loss in Animals Exposed to  
890 Lipopolysaccharide Prenatally." *Experimental Neurology* 190 (2): 373–83.  
891 doi:10.1016/j.expneurol.2004.08.006.
- 892 Ling, Zaodung, Yuangui Zhu, Chong Wai Tong, Joshua A. Snyder, Jack W. Lipton, and Paul M.  
893 Carvey. 2009. "Prenatal Lipopolysaccharide Does Not Accelerate Progressive Dopamine  
894 Neuron Loss in the Rat as a Result of Normal Aging." *Experimental Neurology* 216 (2).  
895 Elsevier Inc.: 312–20. doi:10.1016/j.expneurol.2008.12.004.
- 896 Liu, Yen Wenn, Wei Hsien Liu, Chien Chen Wu, Yi Chen Juan, Yu Chen Wu, Huei Ping Tsai,  
897 Sabrina Wang, and Ying Chieh Tsai. 2016. "Psychotropic Effects of Lactobacillus  
898 Plantarum PS128 in Early Life-Stressed and Naïve Adult Mice." *Brain Research* 1631.

- 899 Elsevier: 1–12. doi:10.1016/j.brainres.2015.11.018.
- 900 Lovallo, William R., Mary-Anne Enoch, Kristen H. Sorocco, Andrea S. Vincent, Ashley Acheson,  
901 Andrew J. Cohoon, Colin A. Hodgkinson, and David Goldman. 2017. "Joint Impact of  
902 Early Life Adversity and COMT Val158Met (Rs4680) Genotypes on the Adult Cortisol  
903 Response to Psychological Stress." *Psychosomatic Medicine* 79 (6): 631–37.  
904 doi:10.1097/PSY.0000000000000481.
- 905 Lovic, Vedran, Hiwote Belay, Claire-Dominique Walker, Christie L Burton, Michael J Meaney,  
906 Marla Sokolowski, and Alison S Fleming. 2013. "Early Postnatal Experience and DRD2  
907 Genotype Affect Dopamine Receptor Expression in the Rat Ventral Striatum."  
908 *Behavioural Brain Research* 237. Elsevier B.V.: 278–82. doi:10.1016/j.bbr.2012.09.046.
- 909 Luchicchi, Antonio, Salvatore Lecca, Miriam Melis, Marta De Felice, Francesca Cadeddu,  
910 Roberto Frau, Anna Lisa Muntoni, Paola Fadda, Paola Devoto, and Marco Pistis. 2016.  
911 "Maternal Immune Activation Disrupts Dopamine System in the Offspring." *The*  
912 *International Journal of Neuropsychopharmacology / Official Scientific Journal of the*  
913 *Collegium Internationale Neuropsychopharmacologicum (CINP)* 19: pyw007.  
914 doi:10.1093/ijnp/pyw007.
- 915 Maduga, Clarice, Léder L. Xavier, Matilde Achaval, Gilberto L. Sanvitto, and Aldo B. Lucion.  
916 2006. "Early Handling, but Not Maternal Separation, Decreases Emotional Responses in  
917 Two Paradigms of Fear without Changes in Mesolimbic Dopamine." *Behavioural Brain*  
918 *Research* 166 (2): 241–46. doi:10.1016/j.bbr.2005.08.005.
- 919 Matthews, Keith, Jeffrey W. Dalley, Christine Matthews, Tung Hu Tsai, and Trevor W. Robbins.  
920 2001. "Periodic Maternal Separation of Neonatal Rats Produces Region- and Gender-  
921 Specific Effects on Biogenic Amine Content in Postmortem Adult Brain." *Synapse* 40 (1):  
922 1–10. doi:10.1002/1098-2396(200104)40:1<1::AID-SYN1020>3.0.CO;2-E.
- 923 Meiser, Johannes, Daniel Weindl, and Karsten Hiller. 2013. "Complexity of Dopamine  
924 Metabolism." *Cell Communication and Signaling* 11 (1): 34. doi:10.1186/1478-811X-11-  
925 34.
- 926 Menegas, William, Joseph F. Bergan, Sachie K. Ogawa, Yoh Isogai, Kannan Umadevi  
927 Venkataraju, Pavel Osten, Naoshige Uchida, and Mitsuko Watabe-Uchida. 2015.  
928 "Dopamine Neurons Projecting to the Posterior Striatum Form an Anatomically Distinct  
929 Subclass." *eLife* 4 (AUGUST2015): 1–30. doi:10.7554/eLife.10032.
- 930 Meyer, Urs, Myriel Nyffeler, Severin Schwendener, Irene Knuesel, Benjamin K. Yee, and Joram  
931 Feldon. 2008. "Relative Prenatal and Postnatal Maternal Contributions to Schizophrenia-  
932 Related Neurochemical Dysfunction after in Utero Immune Challenge."  
933 *Neuropsychopharmacology* 33 (2): 441–56. doi:10.1038/sj.npp.1301413.
- 934 Meyer, Urs, Myriel Nyffeler, Benjamin K. Yee, Irene Knuesel, and Joram Feldon. 2008. "Adult  
935 Brain and Behavioral Pathological Markers of Prenatal Immune Challenge during  
936 Early/Middle and Late Fetal Development in Mice." *Brain, Behavior, and Immunity* 22 (4):  
937 469–86. doi:10.1016/j.bbi.2007.09.012.
- 938 Money, Kelli M., and Gregg D. Stanwood. 2013. "Developmental Origins of Brain Disorders:  
939 Roles for Dopamine." *Frontiers in Cellular Neuroscience* 7 (December): 1–14.



- 940 doi:10.3389/fncel.2013.00260.
- 941 Moreira, Pedro Silva, Pedro R Almeida, Hugo Leite-Almeida, Nuno Sousa, and Patrício Costa.  
942 2016. "Impact of Chronic Stress Protocols in Learning and Memory in Rodents:  
943 Systematic Review and Meta-Analysis." *Plos One* 11 (9): e0163245.  
944 doi:10.1371/journal.pone.0163245.
- 945 Novak, Gabriela, Theresa Fan, Brian F. O'Dowd, and Susan R. George. 2013. "Postnatal  
946 Maternal Deprivation and Pubertal Stress Have Additive Effects on Dopamine D2  
947 Receptor and CaMKII Beta Expression in the Striatum." *International Journal of  
948 Developmental Neuroscience* 31 (3). International Society for Developmental  
949 Neuroscience: 189–95. doi:10.1016/j.ijdevneu.2013.01.001.
- 950 Nutt, David J., Anne Lingford-Hughes, David Erritzoe, and Paul R.A. Stokes. 2015. "The  
951 Dopamine Theory of Addiction: 40 Years of Highs and Lows." *Nature Reviews  
952 Neuroscience* 16 (5). Nature Publishing Group: 305–12. doi:10.1038/nrn3939.
- 953 Ognibene, Elisa, Walter Adriani, Antonio Caprioli, Orlando Ghirardi, Syed F. Ali, Luigi Aloe, and  
954 Giovanni Laviola. 2008. "The Effect of Early Maternal Separation on Brain Derived  
955 Neurotrophic Factor and Monoamine Levels in Adult Heterozygous Reeler Mice."  
956 *Progress in Neuro-Psychopharmacology and Biological Psychiatry* 32 (5): 1269–76.  
957 doi:10.1016/j.pnpbp.2008.03.023.
- 958 Oreland, Sadia, Karita Raudkivi, Lars Oreland, Jaanus Harro, Lotta Arborelius, and Ingrid  
959 Nylander. 2011. "Ethanol-Induced Effects on the Dopamine and Serotonin Systems in  
960 Adult Wistar Rats Are Dependent on Early-Life Experiences." *Brain Research* 1405.  
961 Elsevier B.V.: 57–68. doi:10.1016/j.brainres.2011.06.031.
- 962 Ozawa, Kimiyoshi, Kenji Hashimoto, Takashi Kishimoto, Eiji Shimizu, Hiroshi Ishikura, and  
963 Masaomi Iyo. 2006. "Immune Activation during Pregnancy in Mice Leads to  
964 Dopaminergic Hyperfunction and Cognitive Impairment in the Offspring: A  
965 Neurodevelopmental Animal Model of Schizophrenia." *Biological Psychiatry* 59 (6): 546–  
966 54. doi:10.1016/j.biopsych.2005.07.031.
- 967 Pallarés, María Eugenia, Carlos Javier Baier, Ezequiela Adrover, Melisa Carolina Monteleone,  
968 Marcela Adriana Brocco, and Marta Cristina Antonelli. 2013. "Age-Dependent Effects of  
969 Prenatal Stress on the Corticolimbic Dopaminergic System Development in the Rat Male  
970 Offspring." *Neurochemical Research* 38 (11): 2323–35. doi:10.1007/s11064-013-1143-8.
- 971 Panagiotaropoulos, Theofanis, Stavroula Pondiki, Agapi Papaioannou, Filaretos Alikaridis,  
972 Antonis Stamatakis, Kyriaki Gerozissis, and Fotini Stylianopoulou. 2004. "Regulation of  
973 Corticotropin and Stress Neonatal Handling and Gender Modulate Brain Monoamines  
974 and Plasma Corticosterone Levels Following Repeated Stressors in Adulthood," 181–91.  
975 doi:10.1159/000082516.
- 976 Pang, Yi, Lu Tai Tien, Hobart Zhu, Juying Shen, Camilla F. Wright, Tembra K. Jones, Samir A.  
977 Mamoon, Abhay J. Bhatt, Zhengwei Cai, and Lir Wan Fan. 2015. "Interleukin-1 Receptor  
978 Antagonist Reduces Neonatal Lipopolysaccharide-Induced Long-Lasting  
979 Neurobehavioral Deficits and Dopaminergic Neuronal Injury in Adult Rats." *International  
980 Journal of Molecular Sciences* 16 (4): 8635–54. doi:10.3390/ijms16048635.

- 981 Papaioannou, A., U. Dafni, F. Alikaridis, S. Bolaris, and F. Stylianopoulou. 2002. "Effects of  
982 Neonatal Handling on Basal and Stress-Induced Monoamine Levels in the Male and  
983 Female Rat Brain." *Neuroscience* 114 (1): 195–206. doi:10.1016/S0306-4522(02)00129-X.
- 984 Ploj, K., E. Roman, and I. Nylander. 2003. "Long-Term Effects of Maternal Separation on  
985 Ethanol Intake and Brain Opioid and Dopamine Receptors in Male Wistar Rats."  
986 *Neuroscience* 121 (3): 787–99. doi:10.1016/S0306-4522(03)00499-8.
- 987 Rentesi, Georgia, Katerina Antoniou, Marios Marselos, Marika Syrrou, Zeta Papadopoulou-  
988 Daifoti, and Maria Konstandi. 2013. "Early Maternal Deprivation-Induced Modifications  
989 in the Neurobiological, Neurochemical and Behavioral Profile of Adult Rats." *Behavioural*  
990 *Brain Research* 244. Elsevier B.V.: 29–37. doi:10.1016/j.bbr.2013.01.040.
- 991 Reynaert, Marie Line, Jordan Marrocco, J??r??me Mairesse, Luana Lionetto, Maurizio  
992 Simmaco, Lucie Deruyter, Delphine Allorge, et al. 2016. "Hedonic Sensitivity to Natural  
993 Rewards Is Affected by Prenatal Stress in a Sex-Dependent Manner." *Addiction Biology*  
994 21 (6): 1072–85. doi:10.1111/adb.12270.
- 995 Reznikov, A G, and N D Nosenko. 1995. "Catecholamines in Steroid-Dependent Brain  
996 Development." *The Journal of Steroid Biochemistry and Molecular Biology* 53 (1–6): 349–  
997 53. <http://www.ncbi.nlm.nih.gov/pubmed/7626479>.
- 998 Romano-López, Antonio, Mónica Méndez-Díaz, Fabio García García, Citlalli Regalado-  
999 Santiago, Alejandra E. Ruiz-Contreras, and Oscar Prospéro-García. 2015. "Maternal  
1000 Separation and Early Stress Cause Long-Lasting Effects on Dopaminergic and  
1001 Endocannabinergic Systems and Alters Dendritic Morphology in the Nucleus Accumbens  
1002 and Frontal Cortex in Rats." *Developmental Neurobiology*. doi:10.1002/dneu.22361.
- 1003 Romero, E, C Guaza, B Castellano, and J Borrell. 2010. "Ontogeny of Sensorimotor Gating and  
1004 Immune Impairment Induced by Prenatal Immune Challenge in Rats: Implications for the  
1005 Etiopathology of Schizophrenia." *Molecular Psychiatry* 15 (4). Nature Publishing Group:  
1006 372–83. doi:10.1038/mp.2008.44.
- 1007 Romero, Eva, Carine Ali, Eduardo Molina-Holgado, Bernardo Castellano, Carmen Guaza, and  
1008 José Borrell. 2007. "Neurobehavioral and Immunological Consequences of Prenatal  
1009 Immune Activation in Rats. Influence of Antipsychotics." *Neuropsychopharmacology* 32  
1010 (8): 1791–1804. doi:10.1038/sj.npp.1301292.
- 1011 Rosenthal, R. 1991. *Meta-Analytic Procedures for Social Research*. Sage.
- 1012 Rossi-George, A., M. B. Virgolini, D. Weston, M. Thiruchelvam, and D. A. Cory-Slechta. 2011.  
1013 "Interactions of Lifetime Lead Exposure and Stress: Behavioral, Neurochemical and HPA  
1014 Axis Effects." *NeuroToxicology* 32 (1). Elsevier B.V.: 83–99.  
1015 doi:10.1016/j.neuro.2010.09.004.
- 1016 Rots, Nynke Y., Jeannette De Jong, Judith O. Workel, Seymour Levine, Alexander R. Cools, and  
1017 E. Ronald De Kloet. 1996. "Neonatal Maternally Deprived Rats Have as Adults Elevated  
1018 Basal Pituitary-Adrenal Activity and Enhanced Susceptibility to Apomorphine." *Journal of*  
1019 *Neuroendocrinology* 8 (7): 501–6. doi:10.1046/j.1365-2826.1996.04843.x.
- 1020 Sanyal, Suparna, and Hubert H.M. Van Tol. 1997. "Review the Role of Dopamine D4 Receptors

- 1021 in Schizophrenia and Antipsychotic Action." *Journal of Psychiatric Research* 31 (2): 219–  
1022 32. doi:10.1016/S0022-3956(96)00039-8.
- 1023 Sasagawa, Takayo, Noriko Horii-Hayashi, Akinori Okuda, Takashi Hashimoto, Cho Azuma, and  
1024 Mayumi Nishi. 2017. "Long-Term Effects of Maternal Separation Coupled with Social  
1025 Isolation on Reward Seeking and Changes in Dopamine D1 Receptor Expression in the  
1026 Nucleus Accumbens via DNA Methylation in Mice." *Neuroscience Letters* 641 (February).  
1027 Elsevier Ireland Ltd: 33–39. doi:10.1016/j.neulet.2017.01.025.
- 1028 Scheller-Gilkey, Geraldine, Shannon M Thomas, Bobbi J Woolwine, and Andrew H Miller.  
1029 2002. "Increased Early Life Stress and Depressive Symptoms in Patients with Comorbid  
1030 Substance Abuse and Schizophrenia." *Schizophrenia Bulletin* 28 (2): 223–31.  
1031 doi:10.1093/oxfordjournals.schbul.a006933.
- 1032 Semple, Bridgette D., Klas Blomgren, Kayleen Gimlin, Donna M. Ferriero, and Linda J. Noble-  
1033 Haeusslein. 2013. "Brain Development in Rodents and Humans: Identifying Benchmarks  
1034 of Maturation and Vulnerability to Injury across Species." *Progress in Neurobiology* 106–  
1035 107 (12): 1–16. doi:10.1016/j.pneurobio.2013.04.001.
- 1036 Sheikh, Haroon I., Katie R. Kryski, Yuliya Kotelnikova, Elizabeth P. Hayden, and Shiva M. Singh.  
1037 2017. "Catechol-O-Methyltransferase Gene (Val158met) Polymorphisms and Anxious  
1038 Symptoms in Early Childhood: The Roles of Hypothalamus-Pituitary-Adrenal Axis  
1039 Reactivity and Life Stress." *Neuroscience Letters* 659 (June). Elsevier: 86–91.  
1040 doi:10.1016/j.neulet.2017.08.060.
- 1041 Shin, Sora, Horia Pribiag, Varoth Lilascharoen, Daniel Knowland, Xiao Yun Wang, and Byung  
1042 Kook Lim. 2018. "Drd3 Signaling in the Lateral Septum Mediates Early Life Stress-  
1043 Induced Social Dysfunction." *Neuron* 97 (1). Elsevier Inc.: 195–208.e6.  
1044 doi:10.1016/j.neuron.2017.11.040.
- 1045 Silvagni, Alessandra, Virginia G. Barros, Cristina Mura, Marta C. Antonelli, and Ezio Carboni.  
1046 2008. "Prenatal Restraint Stress Differentially Modifies Basal and Stimulated Dopamine  
1047 and Noradrenaline Release in the Nucleus Accumbens Shell: An 'in Vivo' Microdialysis  
1048 Study in Adolescent and Young Adult Rats." *European Journal of Neuroscience* 28 (4):  
1049 744–58. doi:10.1111/j.1460-9568.2008.06364.x.
- 1050 Silveira, P. P., A. K. Portella, S. A C N Assis, F. B. Nieto, L. A. Diehl, L. M. Crema, W. Peres, et al.  
1051 2010. "Early Life Experience Alters Behavioral Responses to Sweet Food and Accumbal  
1052 Dopamine Metabolism." *International Journal of Developmental Neuroscience* 28 (1):  
1053 111–18. doi:10.1016/j.ijdevneu.2009.08.018.
- 1054 Son, Gi Hoon, Sooyoung Chung, Dongho Geum, Sang Soo Kang, Wan Sung Choi, Kyungjin  
1055 Kim, and Sukwoo Choi. 2007. "Hyperactivity and Alteration of the Midbrain  
1056 Dopaminergic System in Maternally Stressed Male Mice Offspring." *Biochemical and  
1057 Biophysical Research Communications* 352 (3): 823–29. doi:10.1016/j.bbrc.2006.11.104.
- 1058 Swanson, L W. n.d. "The Projections of the Ventral Tegmental Area and Adjacent Regions: A  
1059 Combined Fluorescent Retrograde Tracer and Immunofluorescence Study in the Rat."  
1060 *Brain Research Bulletin* 9 (1–6): 321–53. <http://www.ncbi.nlm.nih.gov/pubmed/6816390>.
- 1061 Tabachnick, Barbara G, and Linda S Fidell. 2013. *Using Multivariate Statistics*. 6, illustr ed.

- 1062 Pearson Education,2013.
- 1063 Team, R Core. 2015. "R: A Language and Environment for Statistical Computing." *R*  
1064 *Foundation for Statistical Computing*. Vienna, Austria. <https://www.r-project.org/>.
- 1065 Teicher, Martin H., Jacqueline A. Samson, Carl M. Anderson, and Kyoko Ohashi. 2016. "The  
1066 Effects of Childhood Maltreatment on Brain Structure, Function and Connectivity."  
1067 *Nature Reviews Neuroscience* 17 (10). Nature Publishing Group: 652–66.  
1068 doi:10.1038/nrn.2016.111.
- 1069 Thompson, Carol L, Lydia Ng, Vilas Menon, Salvador Martinez, Chang Kyu Lee, Katie  
1070 Glattfelder, Susan M. Sunkin, et al. 2014. "A High-Resolution Spatiotemporal Atlas of  
1071 Gene Expression of the Developing Mouse Brain." *Neuron* 83 (2). Elsevier Inc.: 309–23.  
1072 doi:10.1016/j.neuron.2014.05.033.
- 1073 Tien, Lu Tai, Asuka Kaizaki, Yi Pang, Zhengwei Cai, Abhay J. Bhatt, and Lir Wan Fan. 2013.  
1074 "Neonatal Exposure to Lipopolysaccharide Enhances Accumulation of ??-Synuclein  
1075 Aggregation and Dopamine Transporter Protein Expression in the Substantia Nigra in  
1076 Responses to Rotenone Challenge in Later Life." *Toxicology* 308. Elsevier Ireland Ltd: 96–  
1077 103. doi:10.1016/j.tox.2013.03.014.
- 1078 Valenti, Ornella, Kathryn M. Gill, and Anthony A. Grace. 2012. "Different Stressors Produce  
1079 Excitation or Inhibition of Mesolimbic Dopamine Neuron Activity: Response Alteration  
1080 by Stress Pre-Exposure." *European Journal of Neuroscience* 35 (8): 1312–21.  
1081 doi:10.1111/j.1460-9568.2012.08038.x.
- 1082 Van den Noortgate, Wim, José Antonio López-López, Fulgencio Marín-Martínez, and Julio  
1083 Sánchez-Meca. 2013. "Three-Level Meta-Analysis of Dependent Effect Sizes." *Behavior*  
1084 *Research Methods* 45 (2): 576–94. doi:10.3758/s13428-012-0261-6.
- 1085 Vazquez, Vincent, Stéphanie Weiss, Bruno Giros, Marie Pascale Martres, and Valérie Daug?  
1086 2007. "Maternal Deprivation and Handling Modify the Effect of the Dopamine D3  
1087 Receptor Agonist, BP 897 on Morphine-Conditioned Place Preference in Rats."  
1088 *Psychopharmacology* 193 (4): 475–86. doi:10.1007/s00213-007-0789-9.
- 1089 Vesterinen, H. M., E. S. Sena, K. J. Egan, T. C. Hirst, L. Churolov, G. L. Currie, A. Antonic, D. W.  
1090 Howells, and M. R. Macleod. 2014. "Meta-Analysis of Data from Animal Studies: A  
1091 Practical Guide." *Journal of Neuroscience Methods* 221. Elsevier B.V.: 92–102.  
1092 doi:10.1016/j.jneumeth.2013.09.010.
- 1093 Viechtbauer, M. 2010. "Conducting Meta-Analyses in R with the Metafor Package." *Journal of*  
1094 *Statistical Software* 36 (3): 1–48. [www.jstatsoft.org/v36/i03/](http://www.jstatsoft.org/v36/i03/).
- 1095 Vuillermot, S., E. Joodmardi, T. Perlmann, S. Ove Ogren, J. Feldon, and U. Meyer. 2012.  
1096 "Prenatal Immune Activation Interacts with Genetic Nurr1 Deficiency in the Development  
1097 of Attentional Impairments." *Journal of Neuroscience* 32 (2): 436–51.  
1098 doi:10.1523/JNEUROSCI.4831-11.2012.
- 1099 Wang, Sabrina, Jia Ying Yan, Yu Kang Lo, Paul M. Carvey, and Zaidung Ling. 2009.  
1100 "Dopaminergic and Serotonergic Deficiencies in Young Adult Rats Prenatally Exposed  
1101 to the Bacterial Lipopolysaccharide." *Brain Research* 1265. Elsevier B.V.: 196–204.

- 1102 doi:10.1016/j.brainres.2009.02.022.
- 1103 Weston, Hiromi I., Marissa E. Sobolewski, Joshua L. Allen, Doug Weston, Katherine Conrad,  
1104 Sean Pelkowski, Gene E. Watson, Grazyna Zareba, and Deborah A. Cory-Slechta. 2014.  
1105 "Sex-Dependent and Non-Monotonic Enhancement and Unmasking of Methylmercury  
1106 Neurotoxicity by Prenatal Stress." *NeuroToxicology* 41. Elsevier B.V.: 123–40.  
1107 doi:10.1016/j.neuro.2014.01.009.
- 1108 Weston, Hiromi I., Douglas D. Weston, Joshua L. Allen, and Deborah A. Cory-Slechta. 2014.  
1109 "Sex-Dependent Impacts of Low-Level Lead Exposure and Prenatal Stress on Impulsive  
1110 Choice Behavior and Associated Biochemical and Neurochemical Manifestations."  
1111 *NeuroToxicology* 44. Elsevier B.V.: 169–83. doi:10.1016/j.neuro.2014.06.013.
- 1112 Wickham, H. 2009. "Ggplot2: Elegant Graphics for Data Analysis." New York, NY: Springer-  
1113 Verlag.
- 1114 Williams, E. G., Y. Wu, P. Jha, S. Dubuis, P. Blattmann, C. A. Argmann, S. M. Houten, et al. 2016.  
1115 "Systems Proteomics of Liver Mitochondria Function." *Science* 352 (6291): aad0189-  
1116 aad0189. doi:10.1126/science.aad0189.
- 1117 Winter, Christine, Anais Djodari-Irani, Reinhard Sohr, Rudolf Morgenstern, Joram Feldon,  
1118 Georg Juckel, and Urs Meyer. 2009. "Prenatal Immune Activation Leads to Multiple  
1119 Changes in Basal Neurotransmitter Levels in the Adult Brain: Implications for Brain  
1120 Disorders of Neurodevelopmental Origin Such as Schizophrenia." *The International  
1121 Journal of Neuropsychopharmacology* 12 (4): 513–24. doi:10.1017/S1461145708009206.
- 1122 Wise, Roy A, and George F Koob. 2014. "The Development and Maintenance of Drug  
1123 Addiction." *Neuropsychopharmacology* 39 (2). Nature Publishing Group: 254–62.  
1124 doi:10.1038/npp.2013.261.
- 1125 Womersley, Jacqueline S, Jennifer H Hsieh, Lauriston a Kellaway, Greg a Gerhardt, and  
1126 Vivienne a Russell. 2011. "Maternal Separation Affects Dopamine Transporter Function in  
1127 the Spontaneously Hypertensive Rat: An in Vivo Electrochemical Study." *Behavioral and  
1128 Brain Functions: BBF* 7 (1). BioMed Central Ltd: 49. doi:10.1186/1744-9081-7-49.
- 1129 Zager, Adriano, Gregory Mennecier, and João Palermo-Neto. 2012. "Maternal Immune  
1130 Activation in Late Gestation Enhances Locomotor Response to Acute but Not Chronic  
1131 Amphetamine Treatment in Male Mice Offspring: Role of the D1 Receptor." *Behavioural  
1132 Brain Research* 232 (1). Elsevier B.V.: 30–36. doi:10.1016/j.bbr.2012.03.036.
- 1133 Zavitsanou, Katerina, Victoria S. Dalton, Adam K. Walker, Cynthia S. Weickert, Luba Sominsky,  
1134 and Deborah M. Hodgson. 2013. "Neonatal Lipopolysaccharide Treatment Has Long-  
1135 Term Effects on Monoaminergic and Cannabinoid Receptors in the Rat." *Synapse* 67 (6):  
1136 290–99. doi:10.1002/syn.21640.
- 1137 Zhang, Xiang Yang, Priscilla Kehoe, and Therese A. Kosten. 2006. "Neonatal Isolation Alters  
1138 Estrous Cycle Effects on Ventral Striatal Extracellular Monoamine Levels." *Progress in  
1139 Neuro-Psychopharmacology and Biological Psychiatry* 30 (3): 504–11.  
1140 doi:10.1016/j.pnpbp.2005.11.023.
- 1141 Zhang, Yi, Yuting Wang, Lei Wang, Mei Bai, Xiuwu Zhang, and Xiongzhao Zhu. 2015.

- 1142 "Dopamine Receptor D2 and Associated MicroRNAs Are Involved in Stress Susceptibility  
1143 and Resistance to Escitalopram Treatment." *International Journal of*  
1144 *Neuropsychopharmacology* 18 (8): 1–10. doi:10.1093/ijnp/pyv025.
- 1145 Zhang, Yi, Xiongzhao Zhu, Mei Bai, Li Zhang, Liang Xue, and Jinyao Yi. 2013. "Maternal  
1146 Deprivation Enhances Behavioral Vulnerability to Stress Associated with MiR-504  
1147 Expression in Nucleus Accumbens of Rats." *PLoS ONE* 8 (7).  
1148 doi:10.1371/journal.pone.0069934.
- 1149 Zhu, Xiongzhao, Ting Li, Sufang Peng, Xiuling Ma, Xiaogang Chen, and Xiuwu Zhang. 2010.  
1150 "Maternal Deprivation-Caused Behavioral Abnormalities in Adult Rats Relate to a Non-  
1151 Methylation-Regulated D2 Receptor Levels in the Nucleus Accumbens." *Behavioural*  
1152 *Brain Research* 209 (2). Elsevier B.V.: 281–88. doi:10.1016/j.bbr.2010.02.005.
- 1153 Zhu, Xiongzhao, Sufang Peng, Sheng Zhang, and Xiuwu Zhang. 2011. "Stress-Induced  
1154 Depressive Behaviors Are Correlated with Par-4 and DRD2 Expression in Rat Striatum."  
1155 *Behavioural Brain Research* 223 (2). Elsevier B.V.: 329–35. doi:10.1016/j.bbr.2011.04.052.
- 1156 Zhu, Yuanguai, Paul M. Carvey, and Zhaodong Ling. 2007. "Altered Glutathione Homeostasis in  
1157 Animals Prenatally Exposed to Lipopolysaccharide." *Neurochemistry International* 50 (4):  
1158 671–80. doi:10.1016/j.neuint.2006.12.013.
- 1159 Zuckerman, Lee, Moshe Rehavi, Rachel Nachman, and Ina Weiner. 2003. "Immune Activation  
1160 during Pregnancy in Rats Leads to a Postpubertal Emergence of Disrupted Latent  
1161 Inhibition, Dopaminergic Hyperfunction, and Altered Limbic Morphology in the  
1162 Offspring: A Novel Neurodevelopmental Model of Schizophrenia."  
1163 *Neuropsychopharmacology* 28 (10): 1778–89. doi:10.1038/sj.npp.1300248.
- 1164

## 1165 **7 FIGURE CAPTIONS**

---

1166 Fig 1. **Search string and inclusion criteria.** Graphical representation of the three main components of  
1167 the search string. Items highlighted in bold were ultimately included in the analysis; other items were  
1168 not included in the final analysis as explained in the methods' section.

1169

1170 Fig 2. **Graphical representation of signaling pathway.** Dopamine is synthesized by the enzyme  
1171 tyrosine hydroxylase (Th). When released in the synaptic cleft, DA can 1) bind post-synaptic receptors  
1172 (DR1-DR5), 2) bind auto-receptors, 3) bind dopamine transporters (DAT), 4) be converted to the  
1173 metabolites DOPAC, 3MT and HVA by the action of the enzymes MAO and COMT(Meiser, Weindl, and  
1174 Hiller 2013). Items in large (purple) font were included in the meta-analysis.

1175

1176 Fig 3. **Graphical representation DA system projections.** DA neurons are mainly situated in the  
1177 midbrain, and can be subdivided with respect to their projection site(Grace 2016). In particular, DA  
1178 neurons define separate populations of neurons that project to specific brain regions(Swanson, n.d.;  
1179 Menegas et al. 2015). The major DA pathways are 1) mesocortical pathway, which defines projections  
1180 from the VTA to the prefrontal cortex (PFC); 2) mesolimbic, from VTA to limbic system; 3) and  
1181 nigrostriatal pathway, from substantia nigra (SN) to dorsal striatum, caudate nucleus and putamen.  
1182 Other projections connect VTA to the hypothalamus, hippocampus and amygdala. Besides hosting  
1183 dopaminergic neurons, these brain areas are involved in the feedback response to stress(Keller-Wood  
1184 2015).

1185

1186 Fig 4. **Flow-chart of study selection and analysis.**

1187

1188 Fig 5. **Summary of effects: prenatal dataset.** Boxplot representing the summary of effect estimates  
1189 for every combination between outcome variable (biochemical markers) and brain area. White bars =  
1190 enough comparisons for meaningful quantification (rule of thumb: at least 4 comparisons from 3  
1191 papers), black bars = number of comparisons insufficient for analysis.

1192

1193

1194 Fig 6. **Striatal DOPAC in the prenatal dataset.** (A) Forest plot. Results of univariate and 3-level meta-  
1195 analysis are reported (bottom diamonds), as well as subgroup analysis on the ELS model used. (B)  
1196 Cumulative forest plot. This plot displays the accumulation of evidence over time as the individual  
1197 comparisons are added in chronological order. M = males, F = females, Method = method of  
1198 assessment, hip = hippocampus, N = amount of animals, SEM = standard error of the mean, CI =  
1199 confidence interval. Following the name of the study, \_n represents the number of the experiment, .n =  
1200 represents which comparison within that experiment.

1201

1202 Fig 7. **Summary of effects: postnatal dataset.** Boxplot representing the summary of effect estimates  
1203 for every combination between outcome variable (biochemical markers) and brain area. White bars =  
1204 enough comparisons for meaningful quantification (rule of thumb: at least 4 comparisons from 3  
1205 papers), black bars = number of comparisons insufficient for analysis.

1206

1207 Fig 8. **Striatal DOPAC in the postnatal dataset.** Forest plot. Results of univariate as well as 3-level  
1208 meta-analysis are reported (bottom diamonds), as well as subgroup analysis on the ELS model used. \*  
1209 = effect sizes of handling were multiplied by -1 to maintain consistency directionality of the other  
1210 models. A decrease in the graph identifies an increase in DOPAC in ELS animals. M = males, F =  
1211 females, Method = method of assessment, hip = hippocampus, N = amount of animals, SEM =  
1212 standard error of the mean, CI = confidence interval, MD = mother separated from the pups, LPS =  
1213 injection of LPS. Following the name of the study, \_n represents the number of the experiment, .n  
1214 represents which comparison within that experiment.

1215

1216 Fig 9. **Risk of bias assessment.** Each bar represents a different risk of bias item. Yes = measurements  
1217 have been taken to avoid bias; no = no measurements were taken to avoid bias; unclear = not enough  
1218 information provided in the paper to determine the risk of bias.

1219

1220 Fig 10. **Funnel plots.** Publication bias was evaluated by qualitatively assessing symmetry in funnel plot  
1221 in the (A) prenatal and (B) postnatal datasets.

1222

1223 Fig 11. **MaDEapp.** Screen shot for visualization of MaDEapp, a web-based tool to perform *ad hoc*  
1224 meta-analysis of the topic of ELS and biochemical indicators of the DA system. The app can be found  
1225 at **\*\*website\*\***.



# ELS models

## *Prenatal*

**Injection LPS**

**Injection Poly I:C**

Maternal immune activation

**Restraint**

Chronic unpredictable stress

Other injections (e.g. glucocorticoids)

## *Postnatal*

**Removal dam from litter (MD/MS)**

**Removal pup from litter (isolation)**

**Handling**

**Injection LPS (in pups)**

Licking and grooming

Limited nesting and bedding

Communal housing

Other injections

## Outcome measures

**DA**

**DA precursors** (tyrosine, **Th**, L-DOPA)

**DA metabolites** (**DOPAC**, **HVA**, **3-MT**)

DA turnovers (DOPAC/DA, HVA/DA, 3-MT/DA)

**DA receptors** (**DR1**, **DR2**, **DR3**, DR4, DR5)

**DA transporter** (**DAT**)

## Species

**Mice**

**Rats**

Degus

Mandarines voles

Other rodents

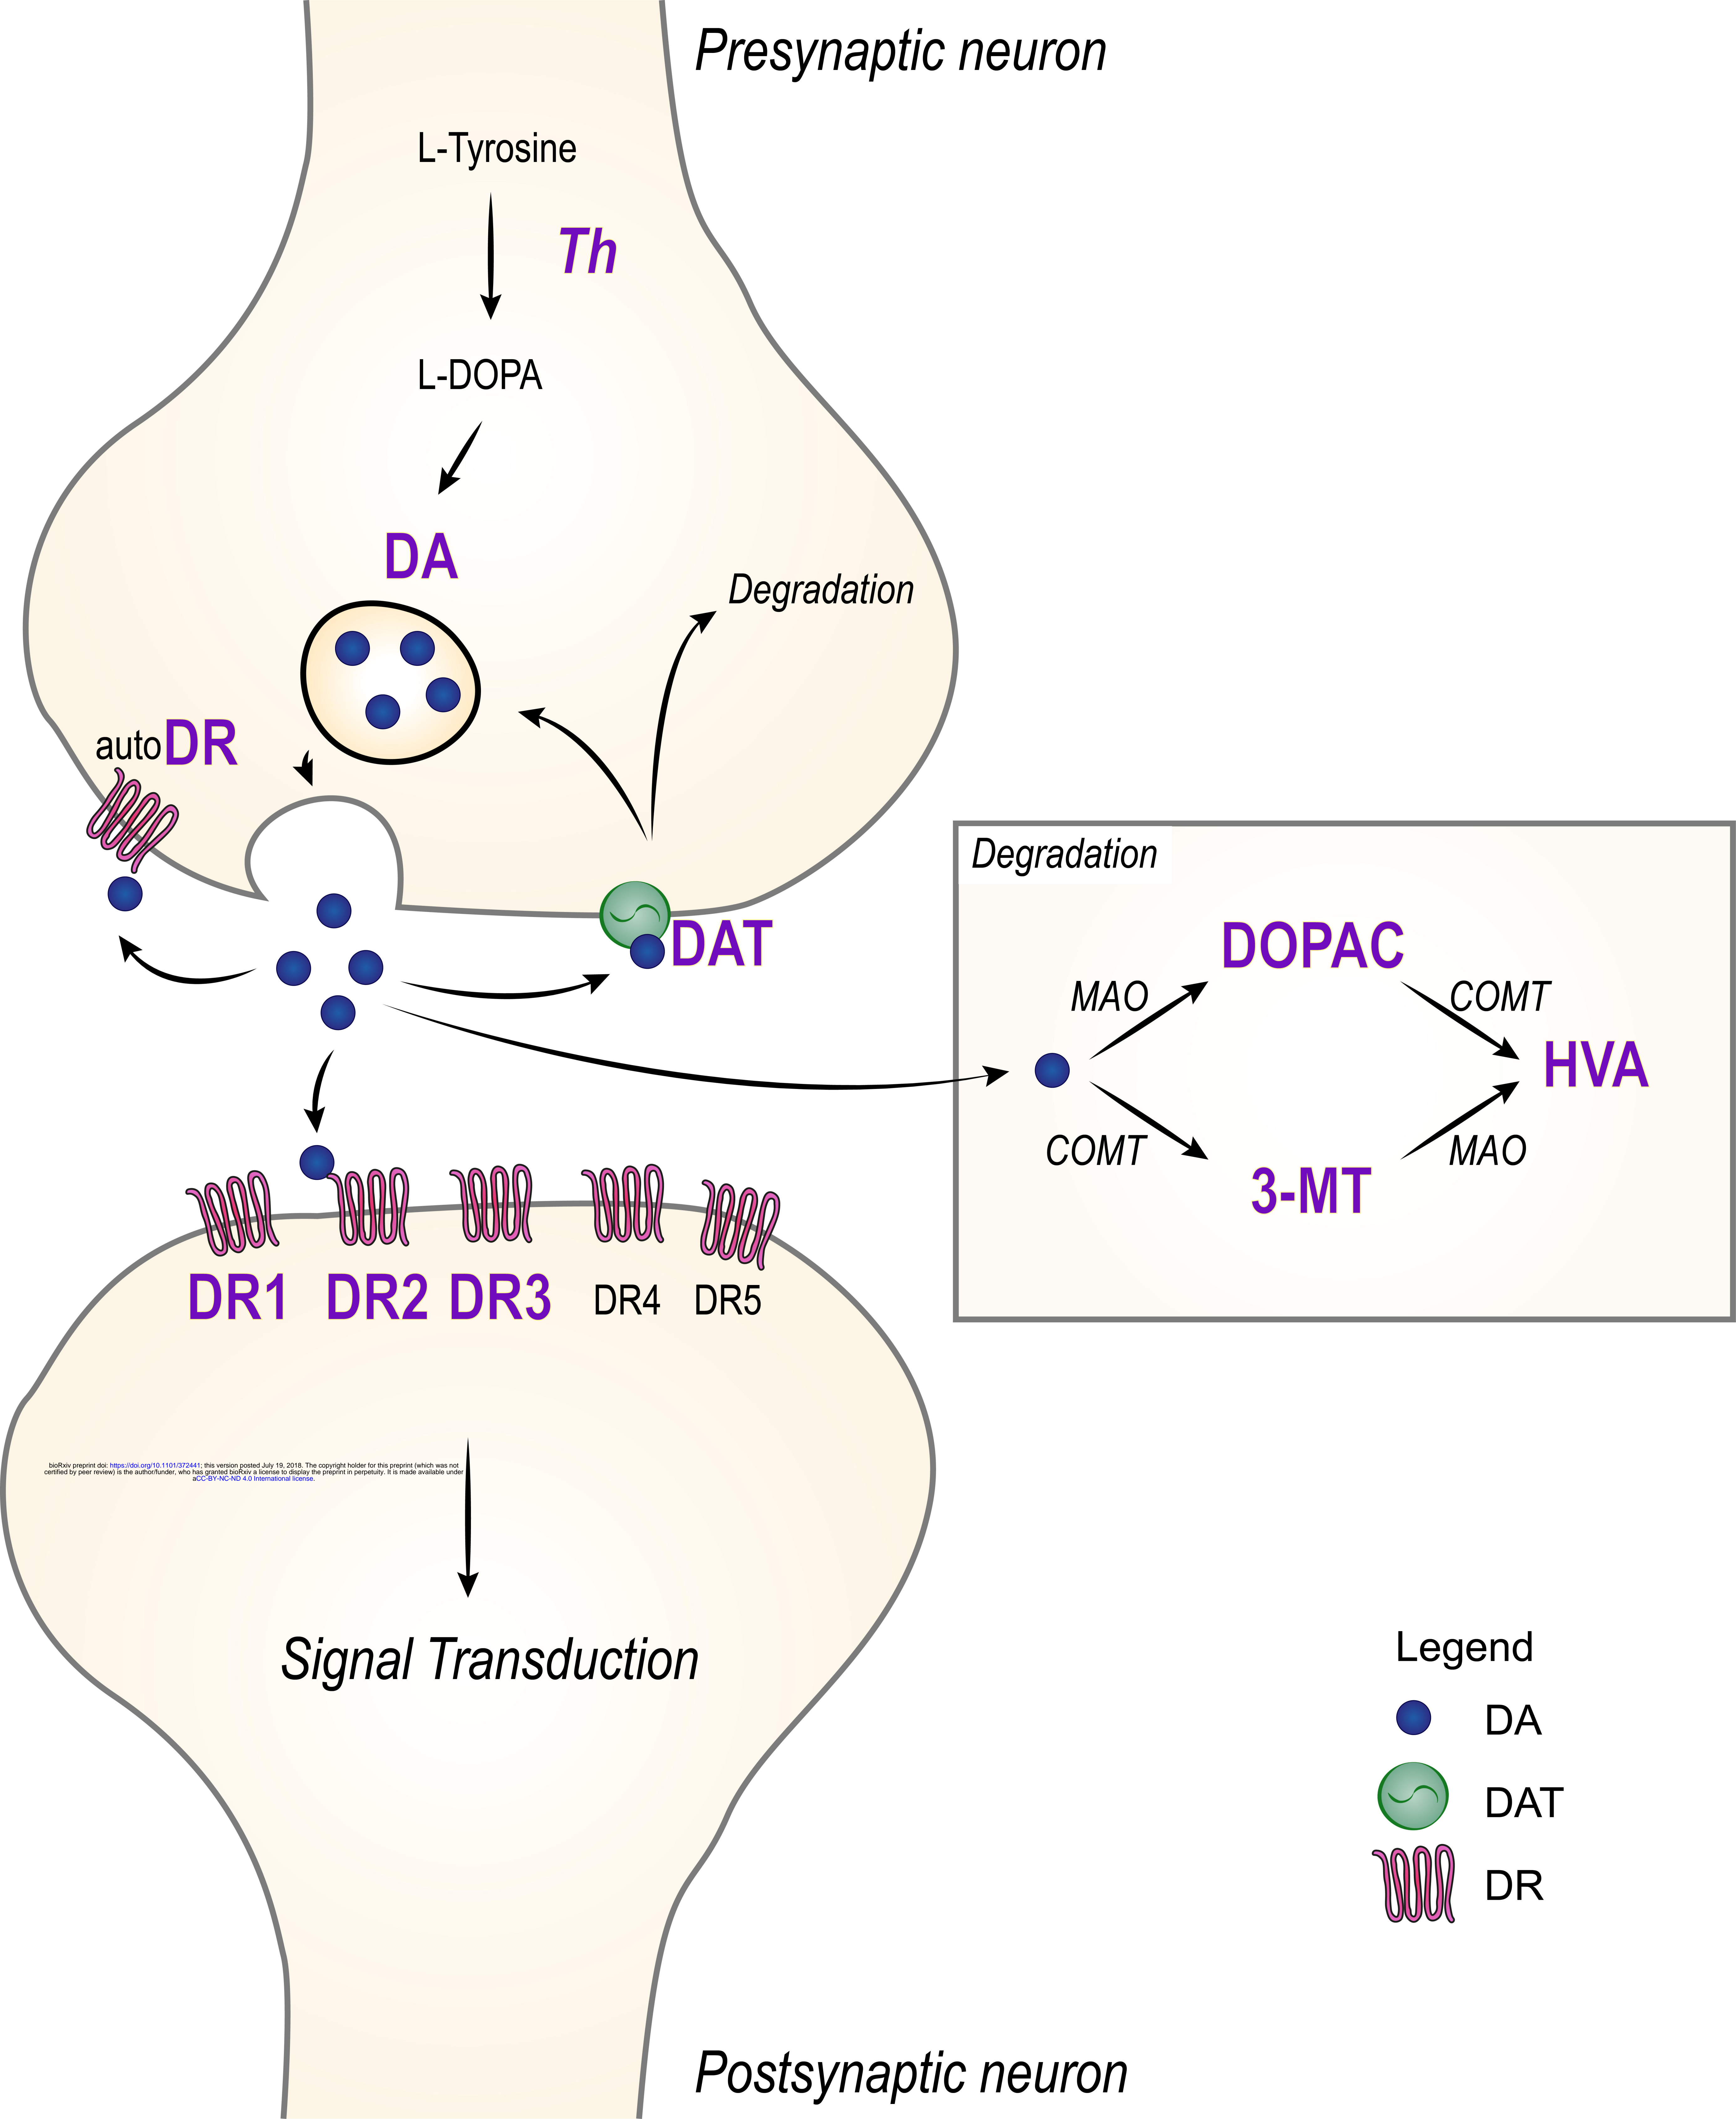

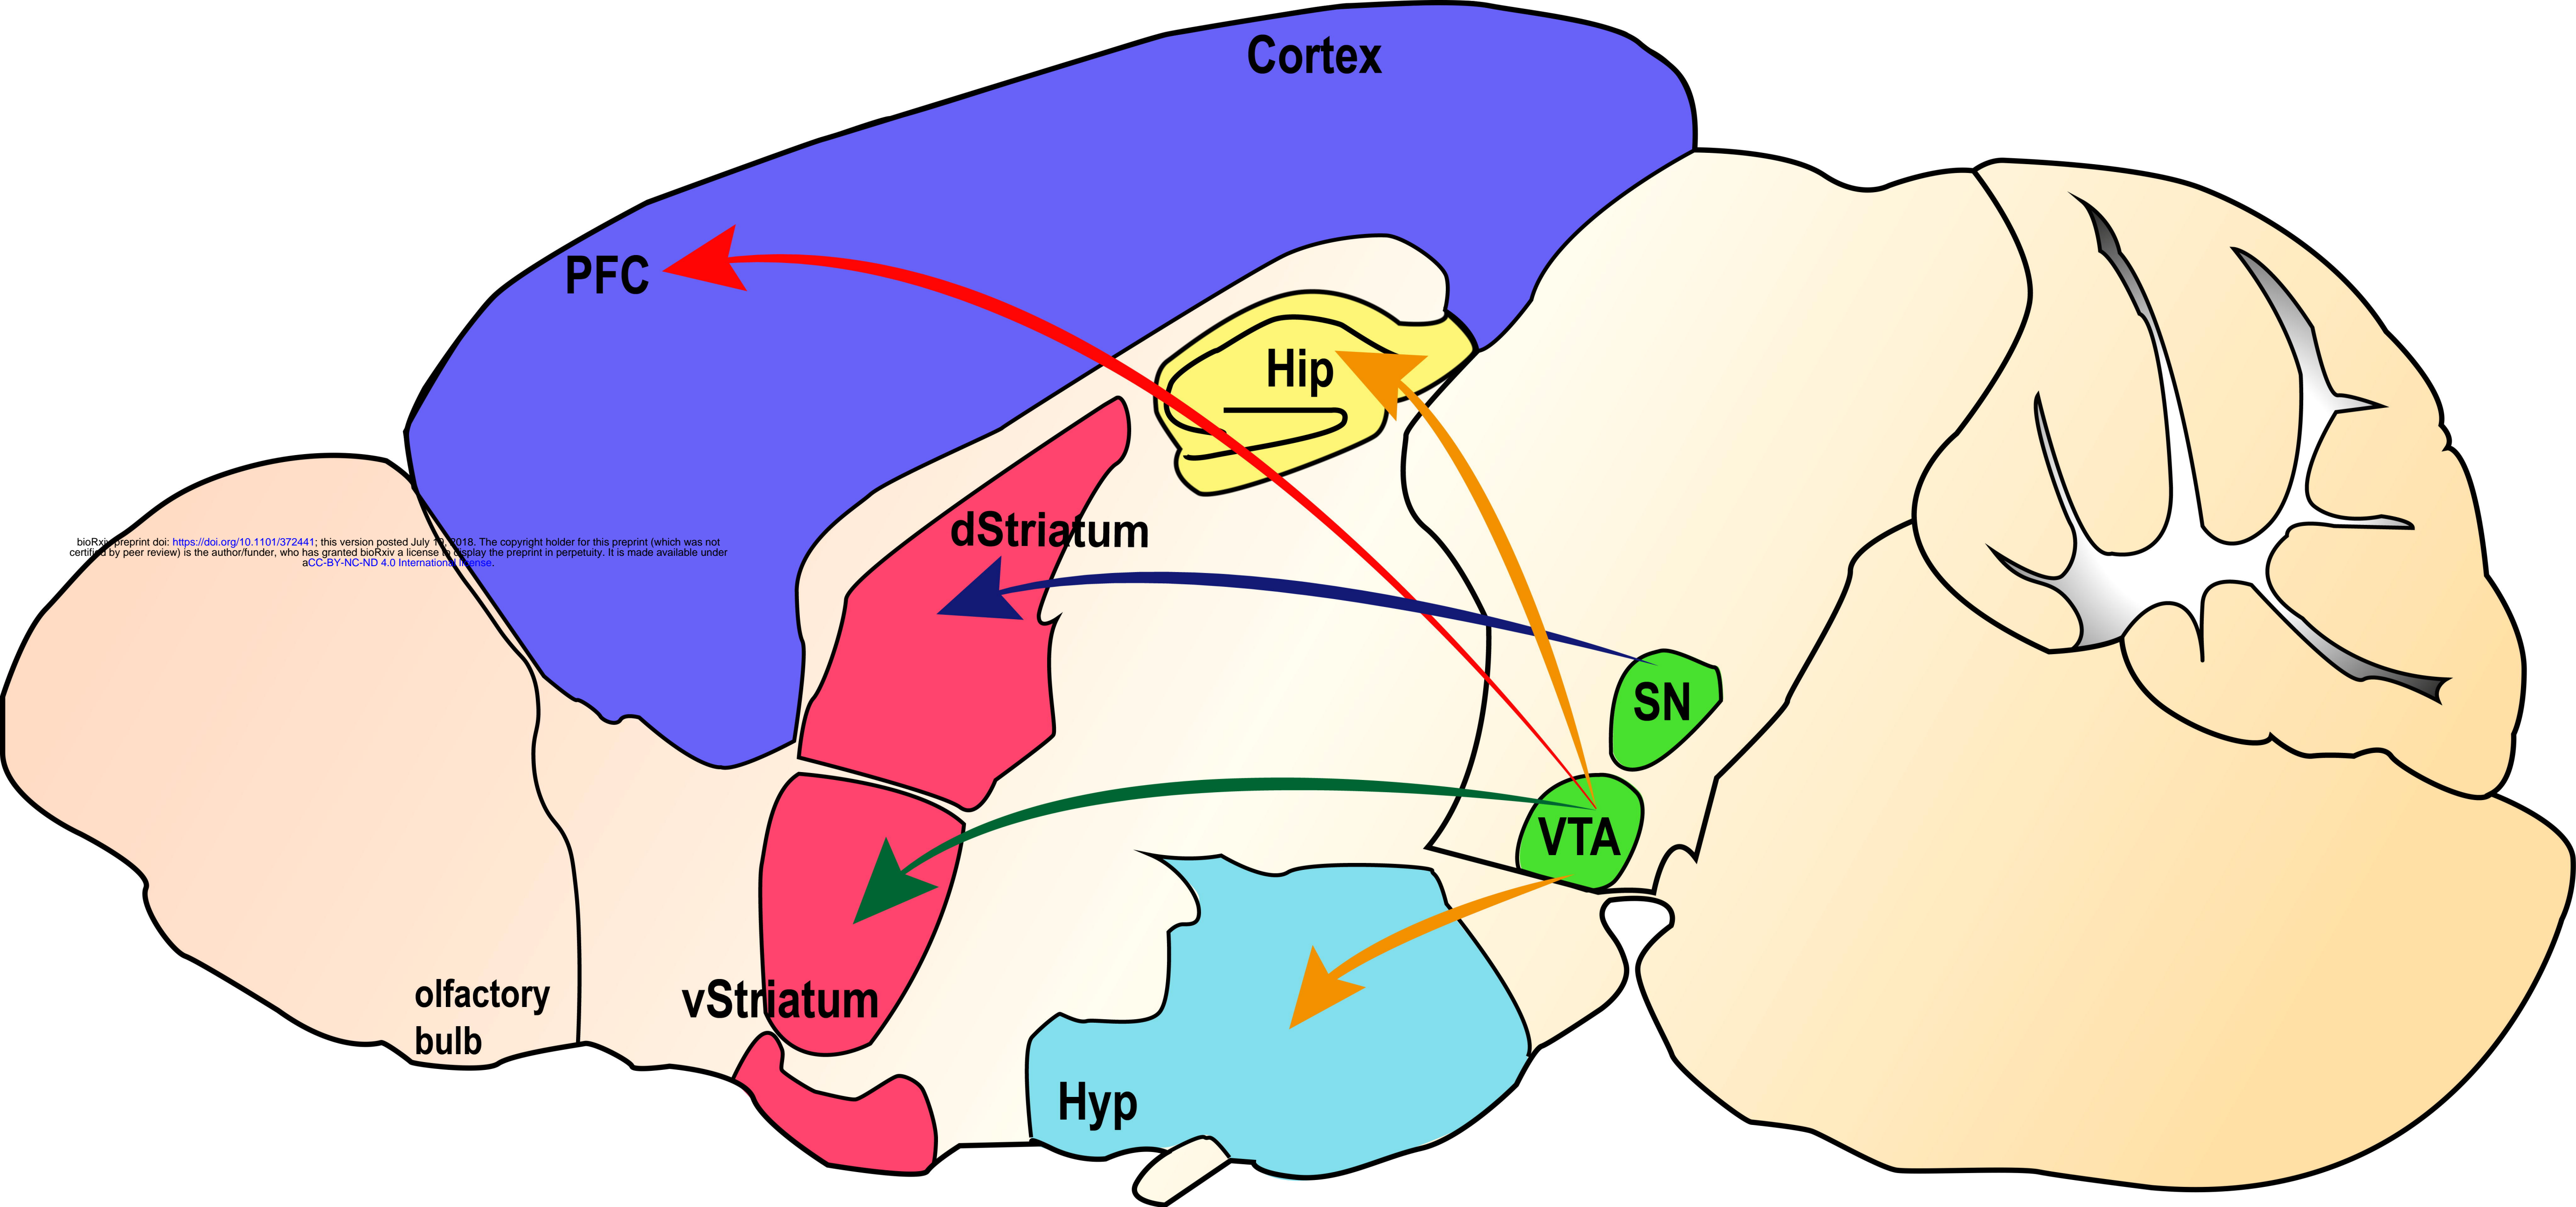

bioRxiv preprint doi: <https://doi.org/10.1101/372441>; this version posted July 17, 2018. The copyright holder for this preprint (which was not certified by peer review) is the author/funder, who has granted bioRxiv a license to display the preprint in perpetuity. It is made available under aCC-BY-NC-ND 4.0 International license.

- |                                                                                     |              |                                                                                     |                   |
|-------------------------------------------------------------------------------------|--------------|-------------------------------------------------------------------------------------|-------------------|
|  | Mesocortical |  | Limbic area       |
|  | Mesolimbic   |  | VTA area          |
|  | Nigostriatal |  | Cortical area     |
|  | Other        |  | Striatal area     |
|                                                                                     |              |  | Hypothalamic area |

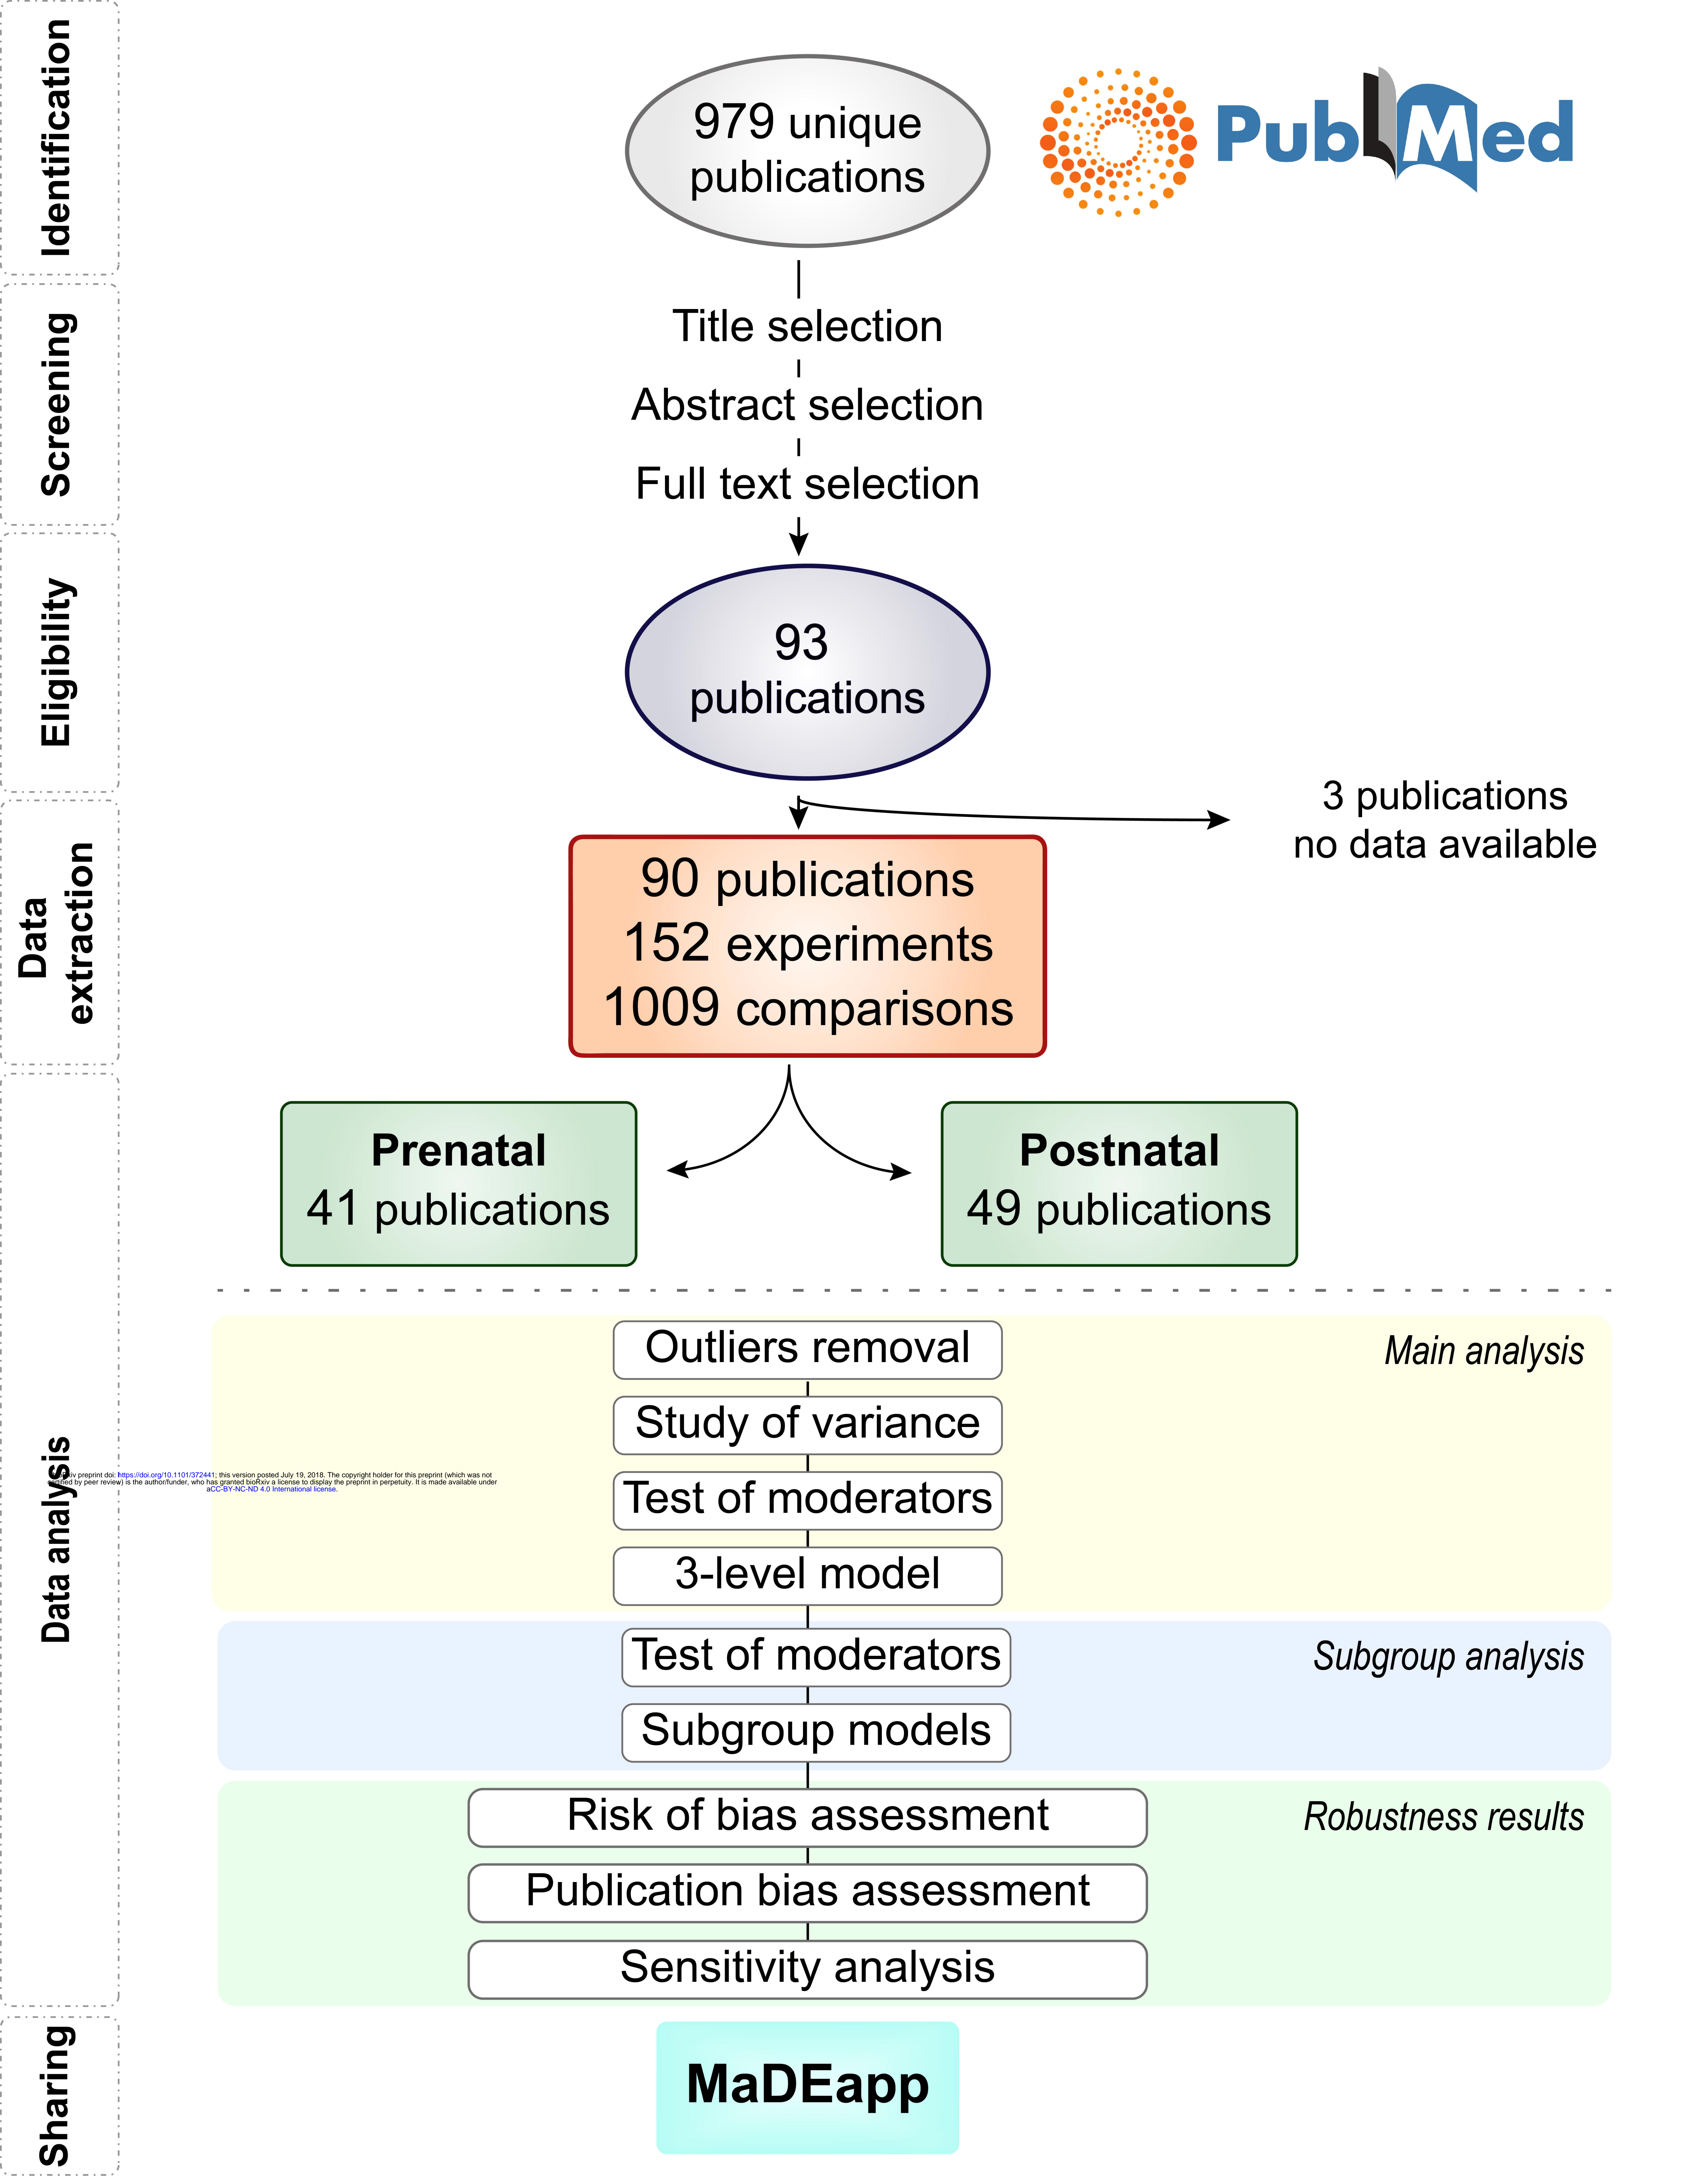

### Striatal area

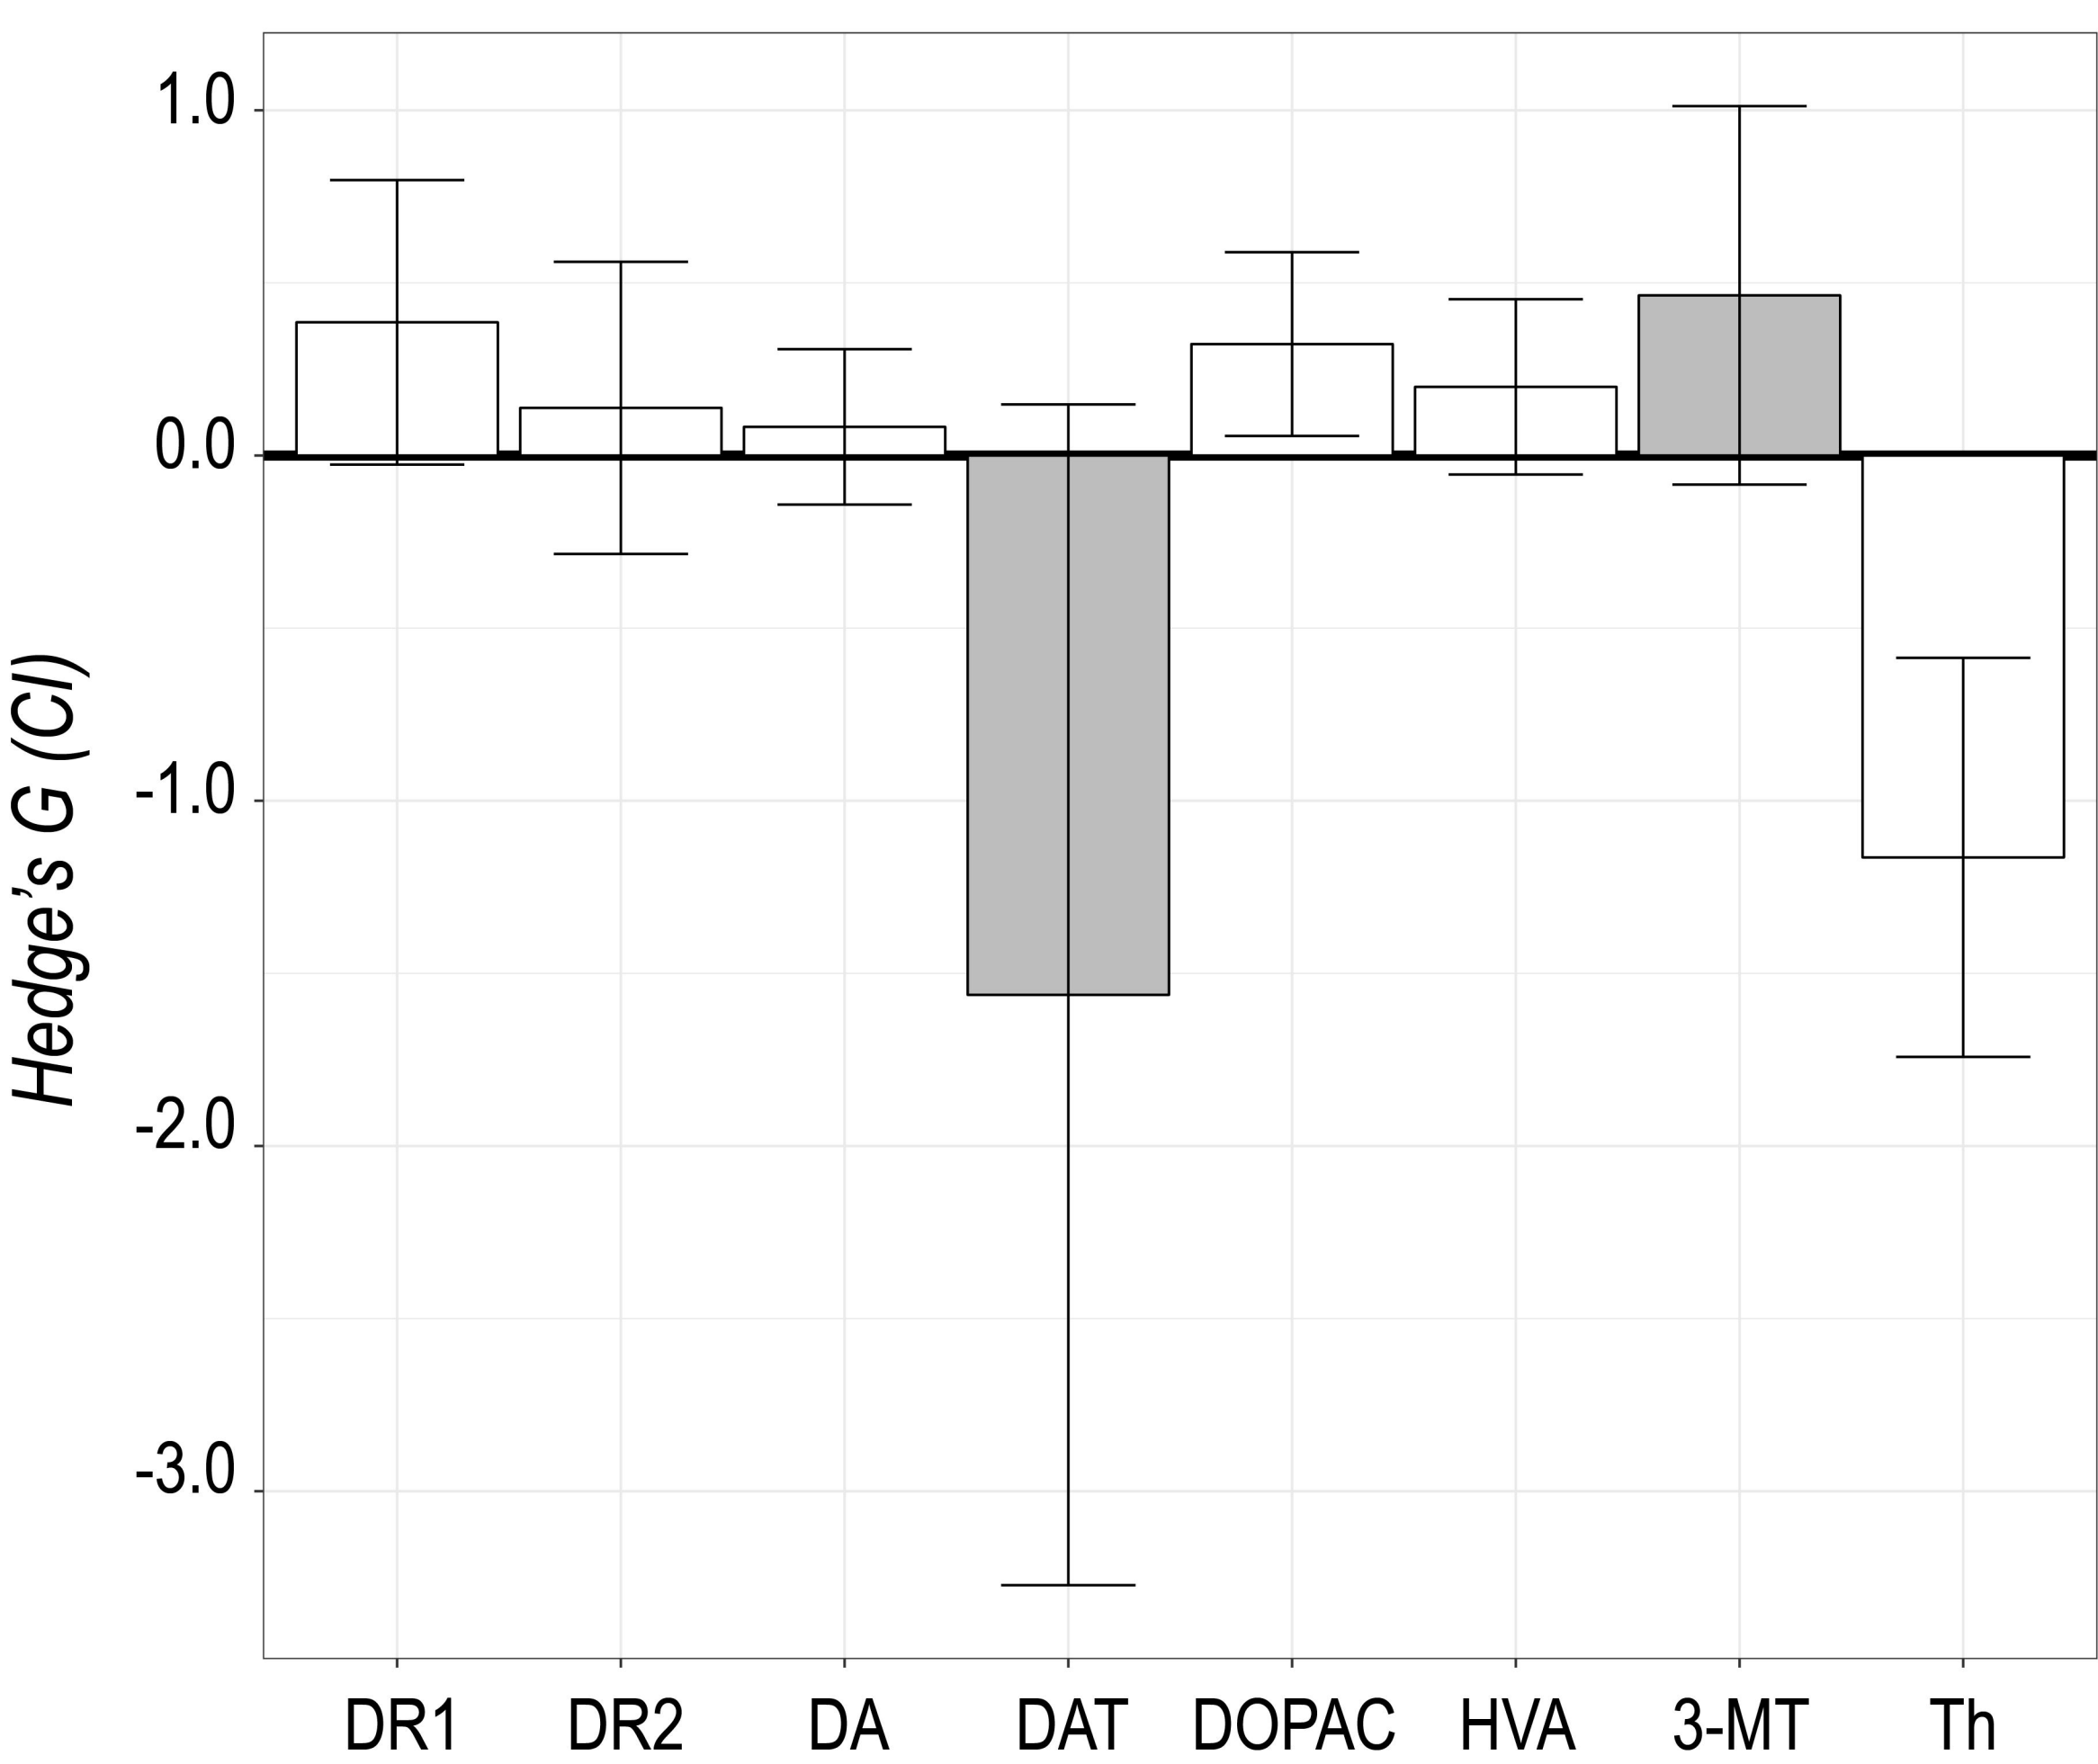

### Limbic area

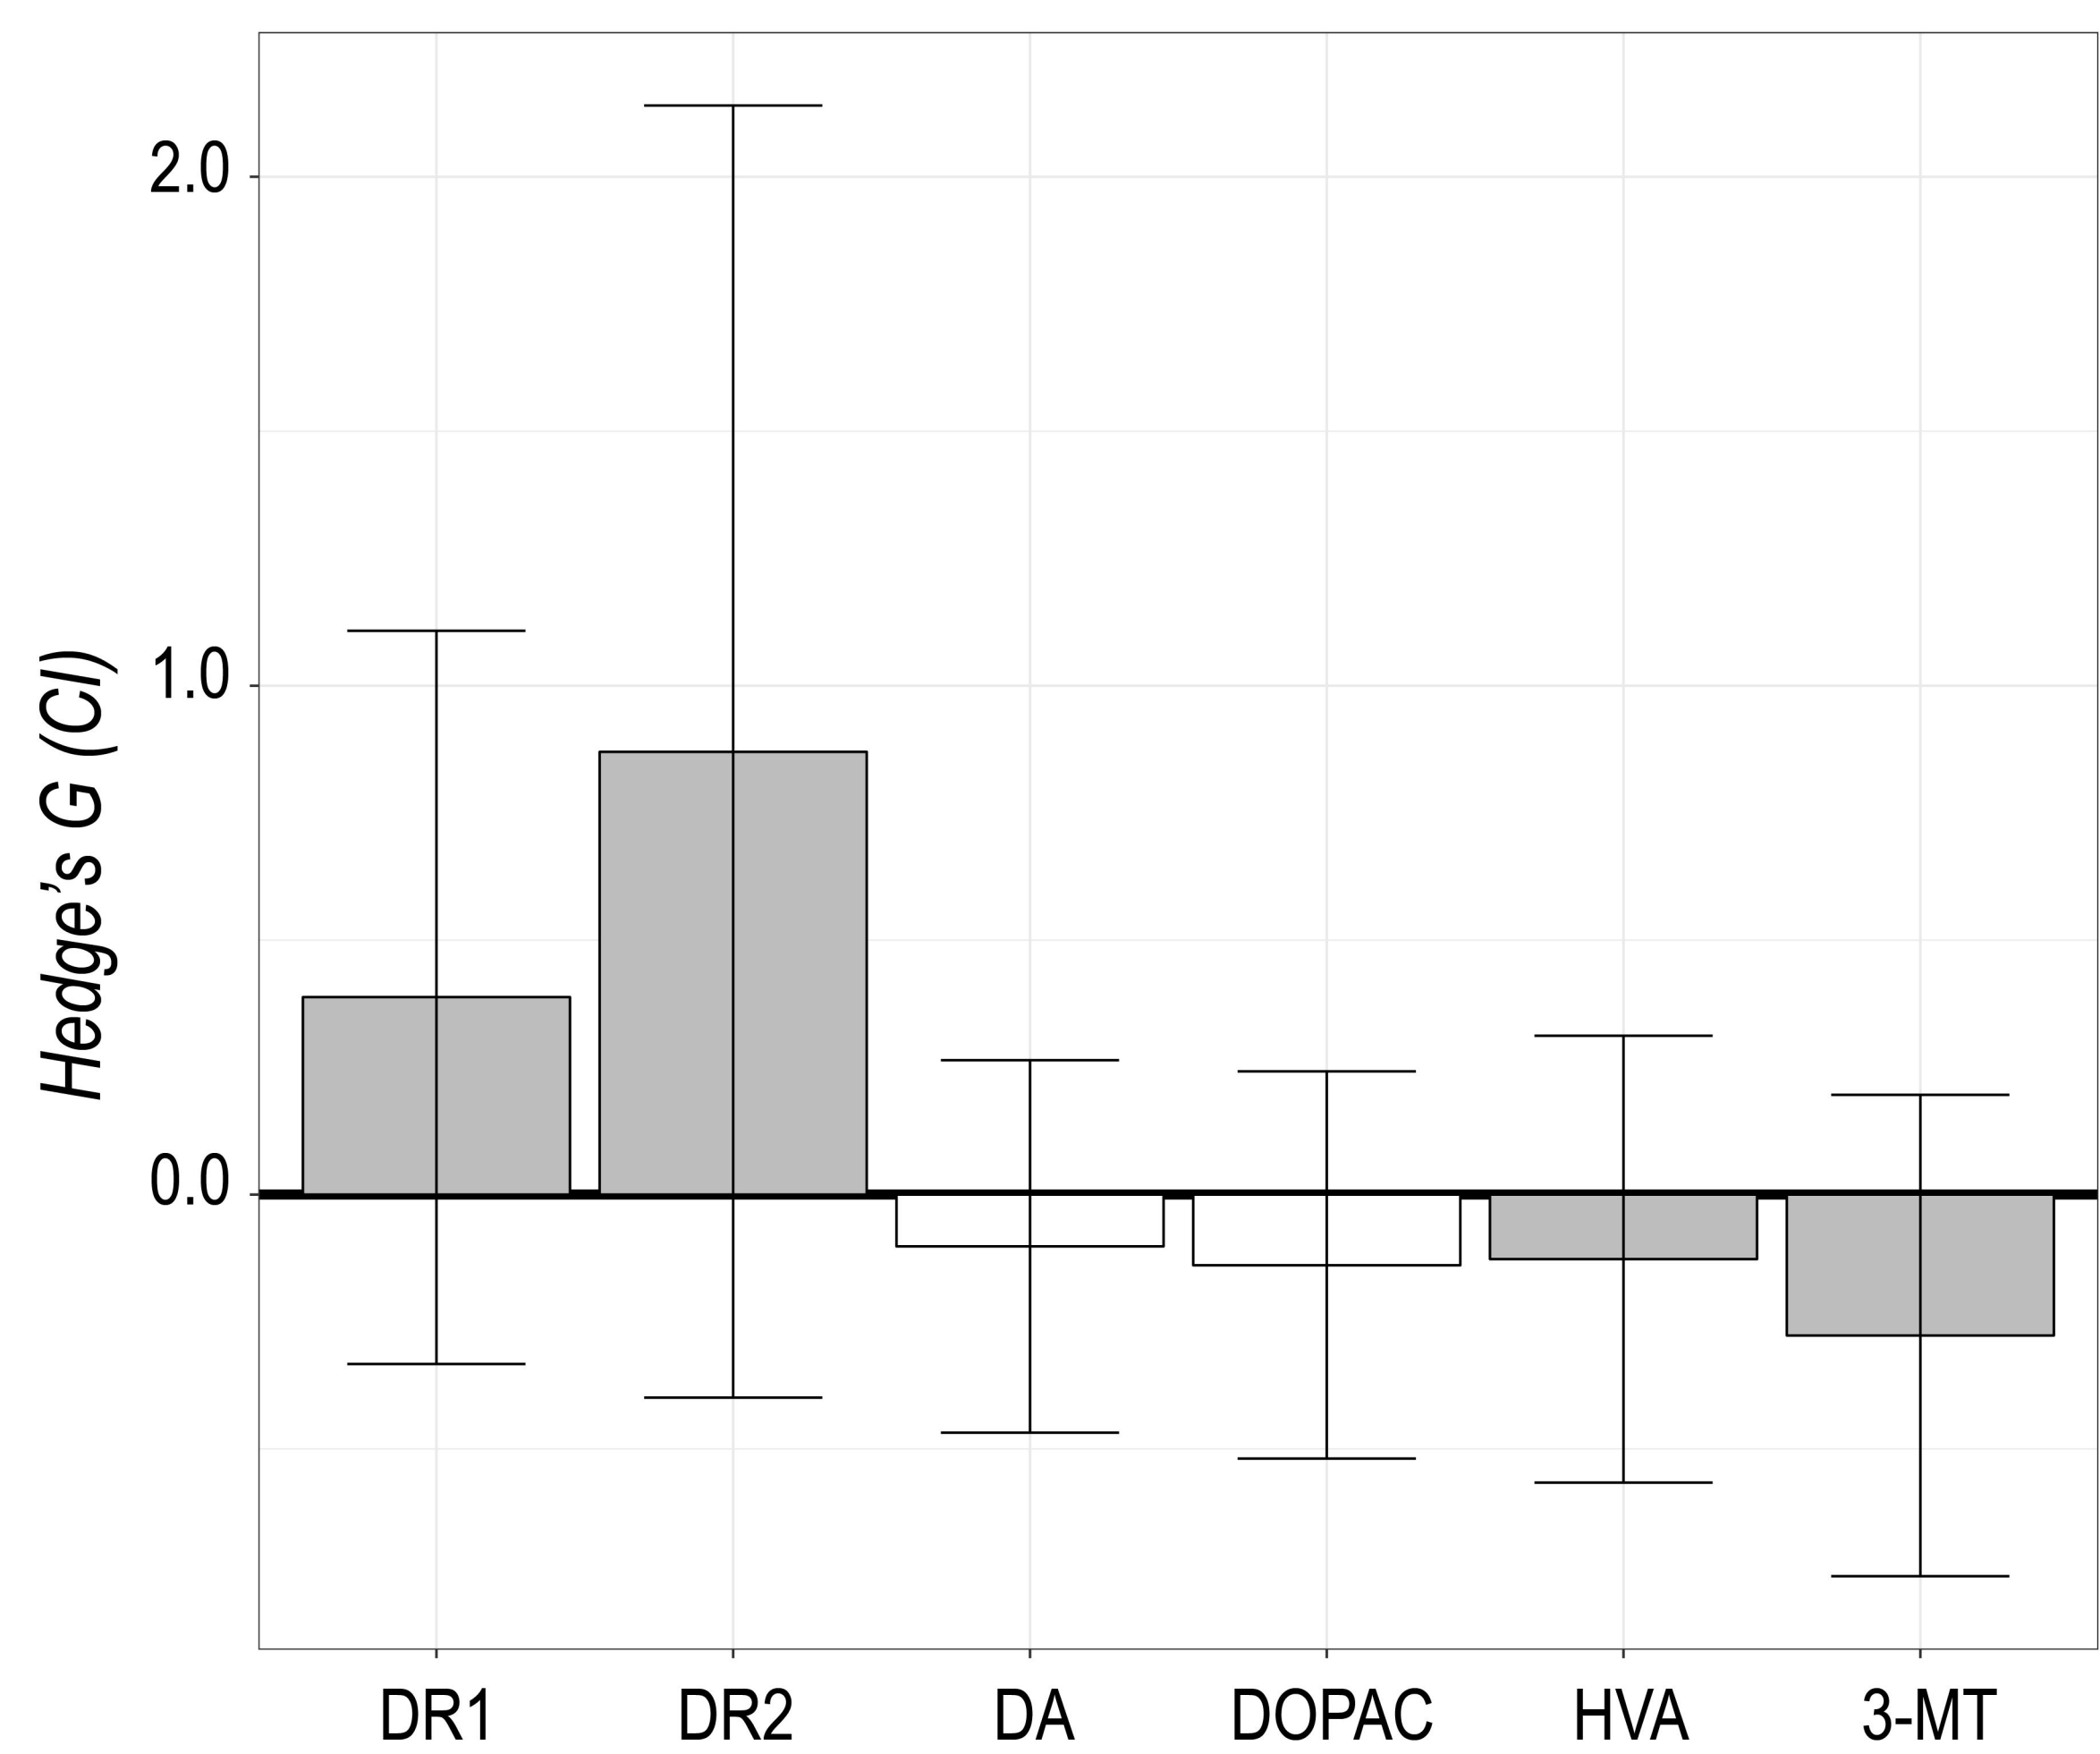

### PFC area

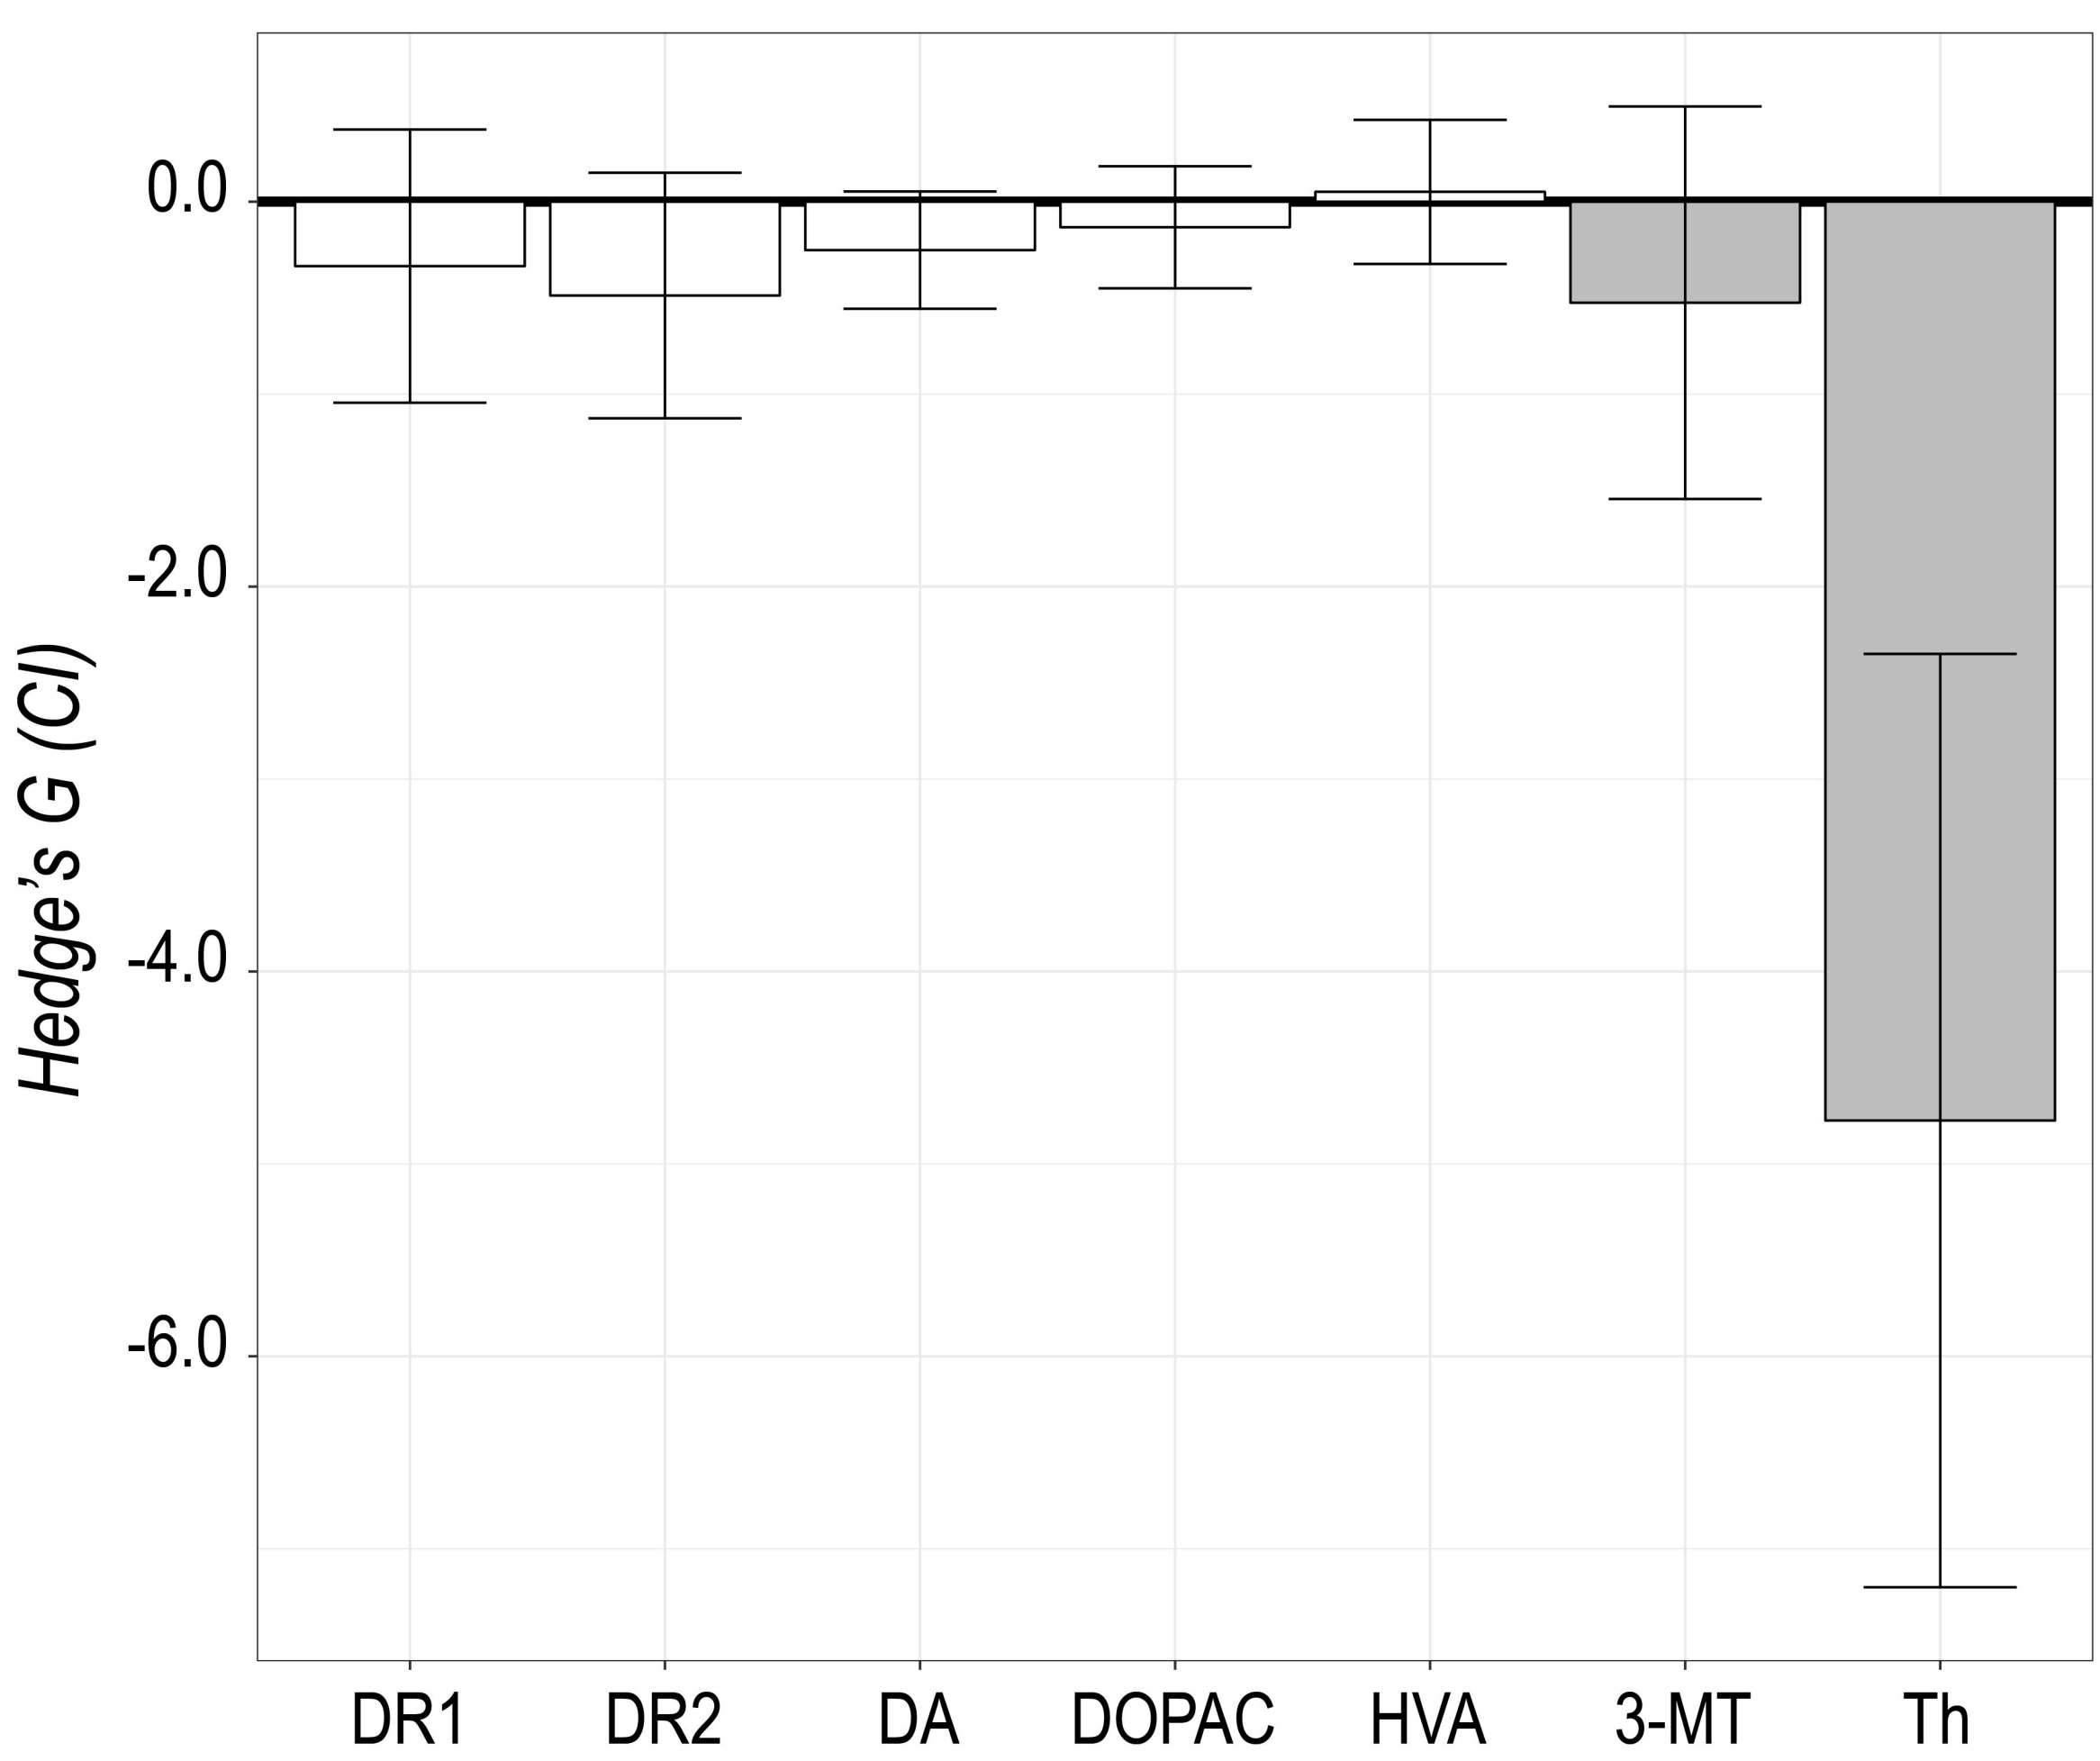

### VTA area

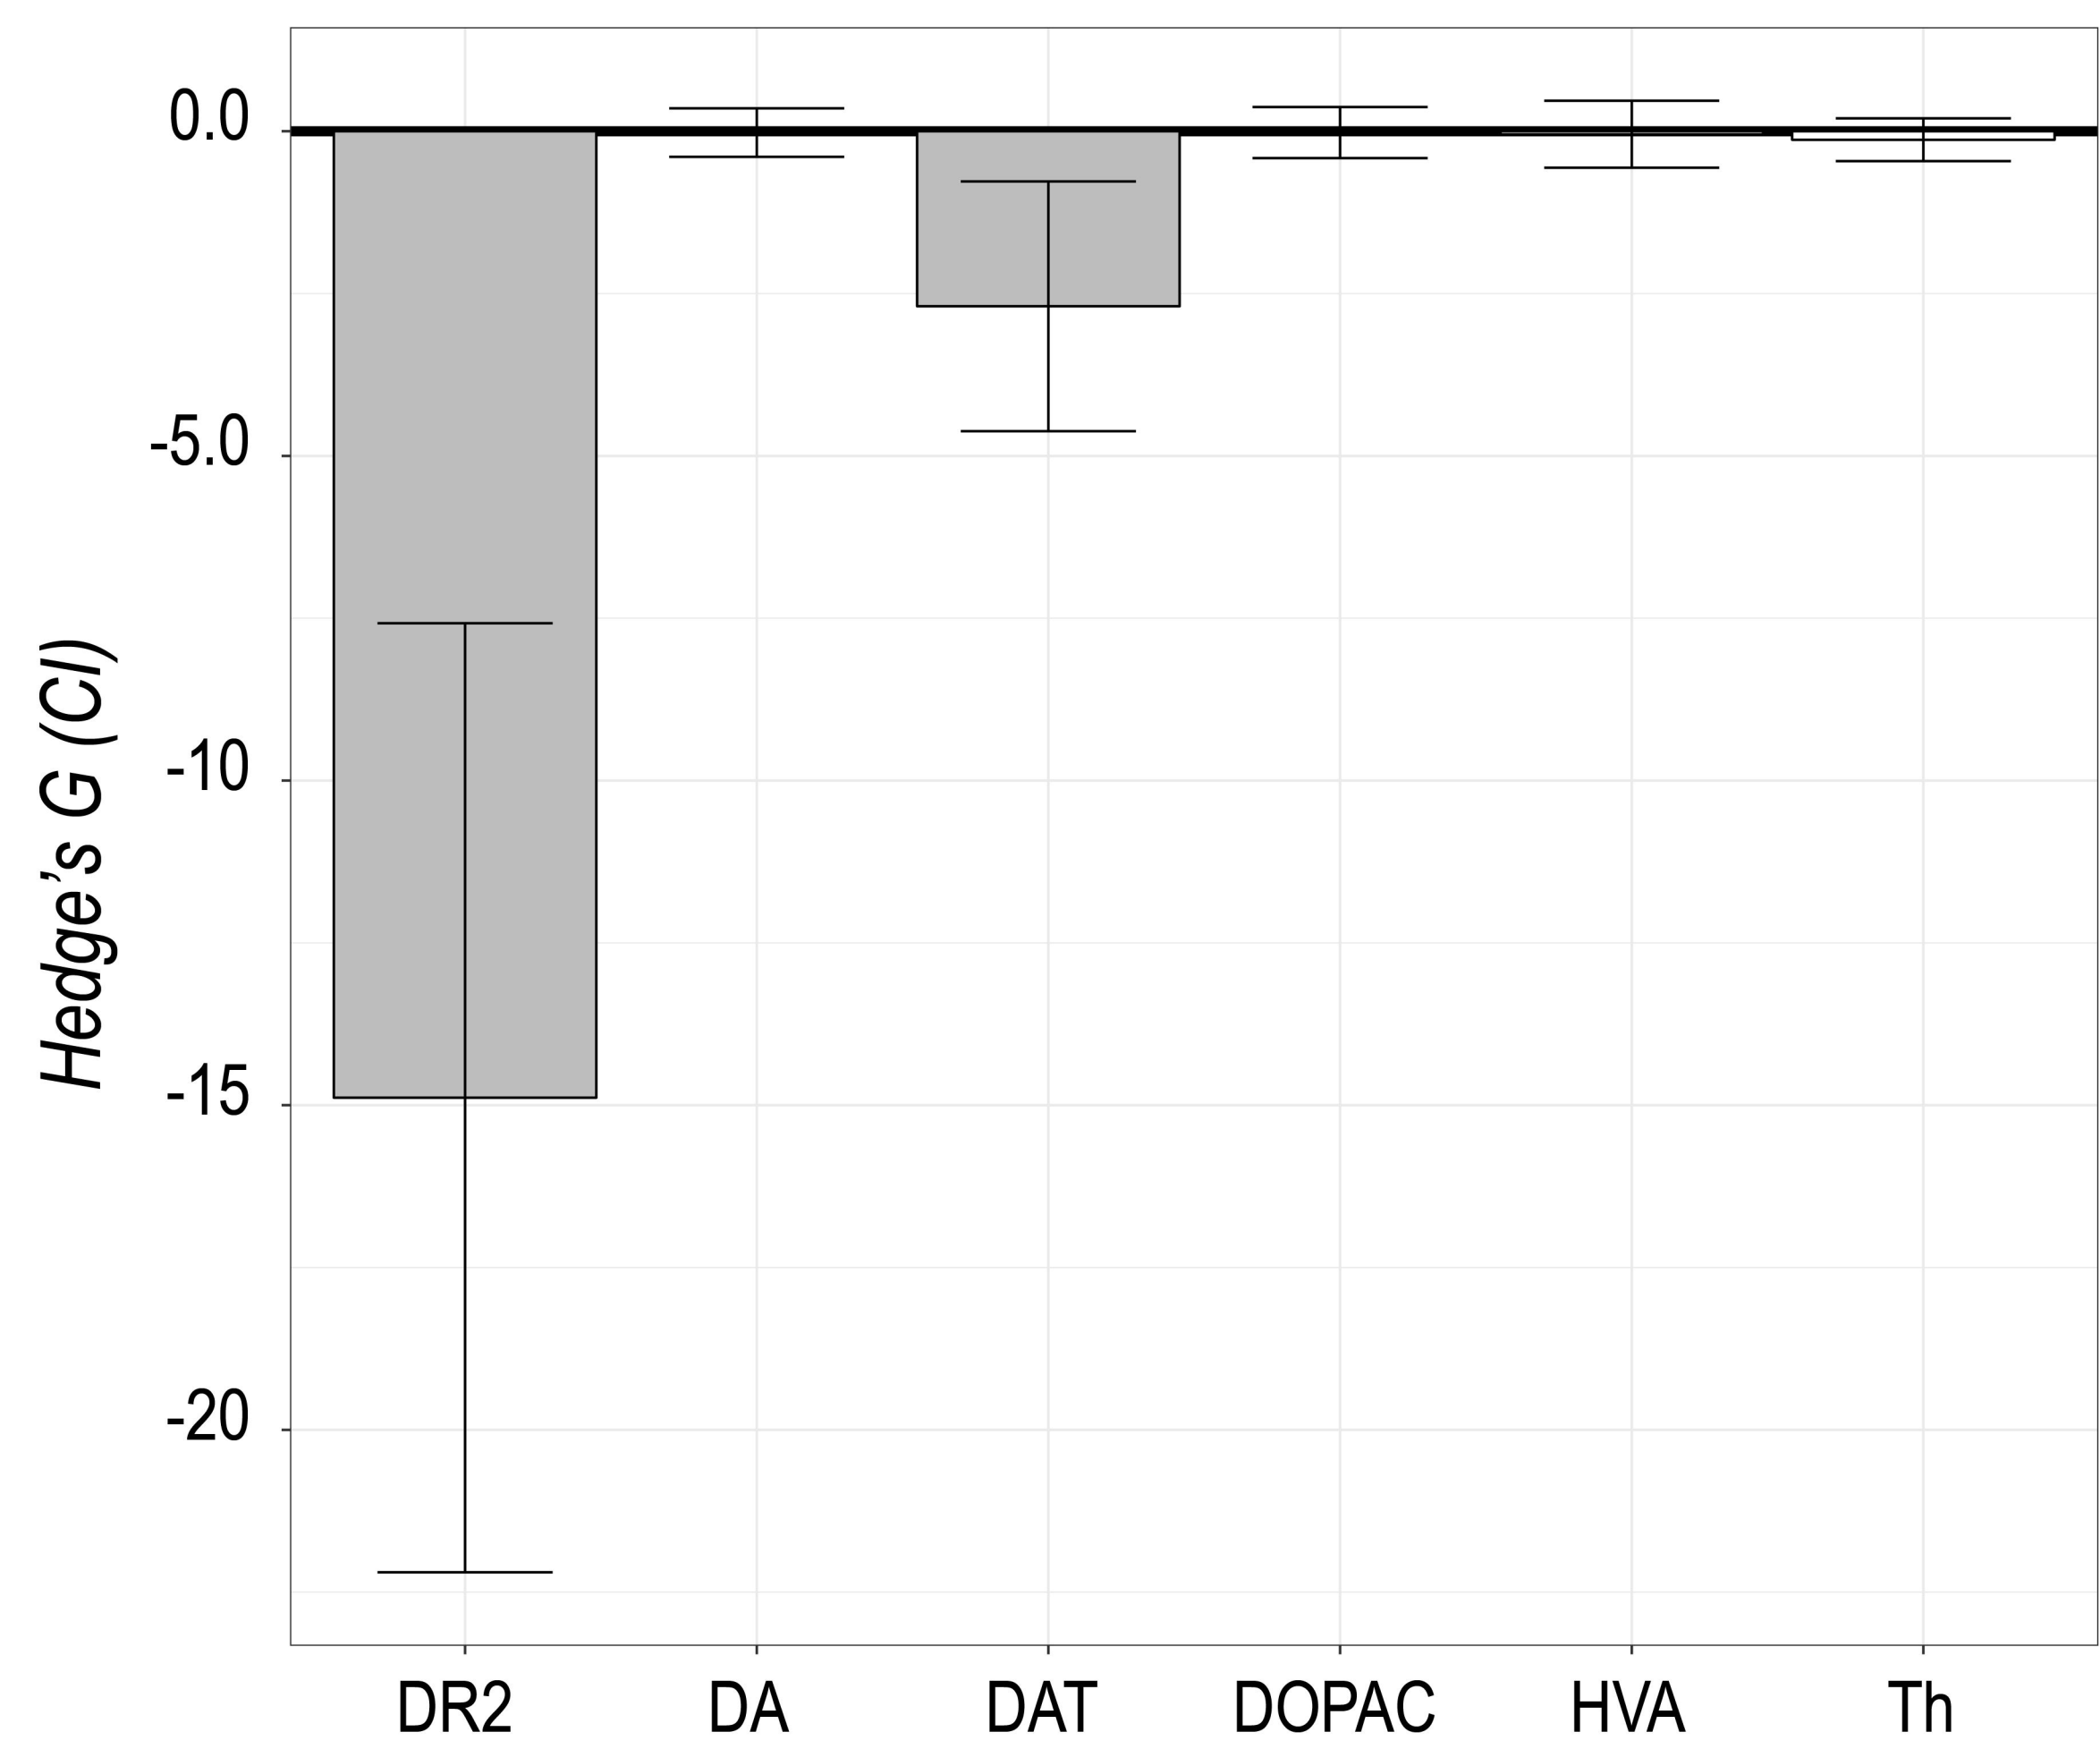

### Hypothalamic area

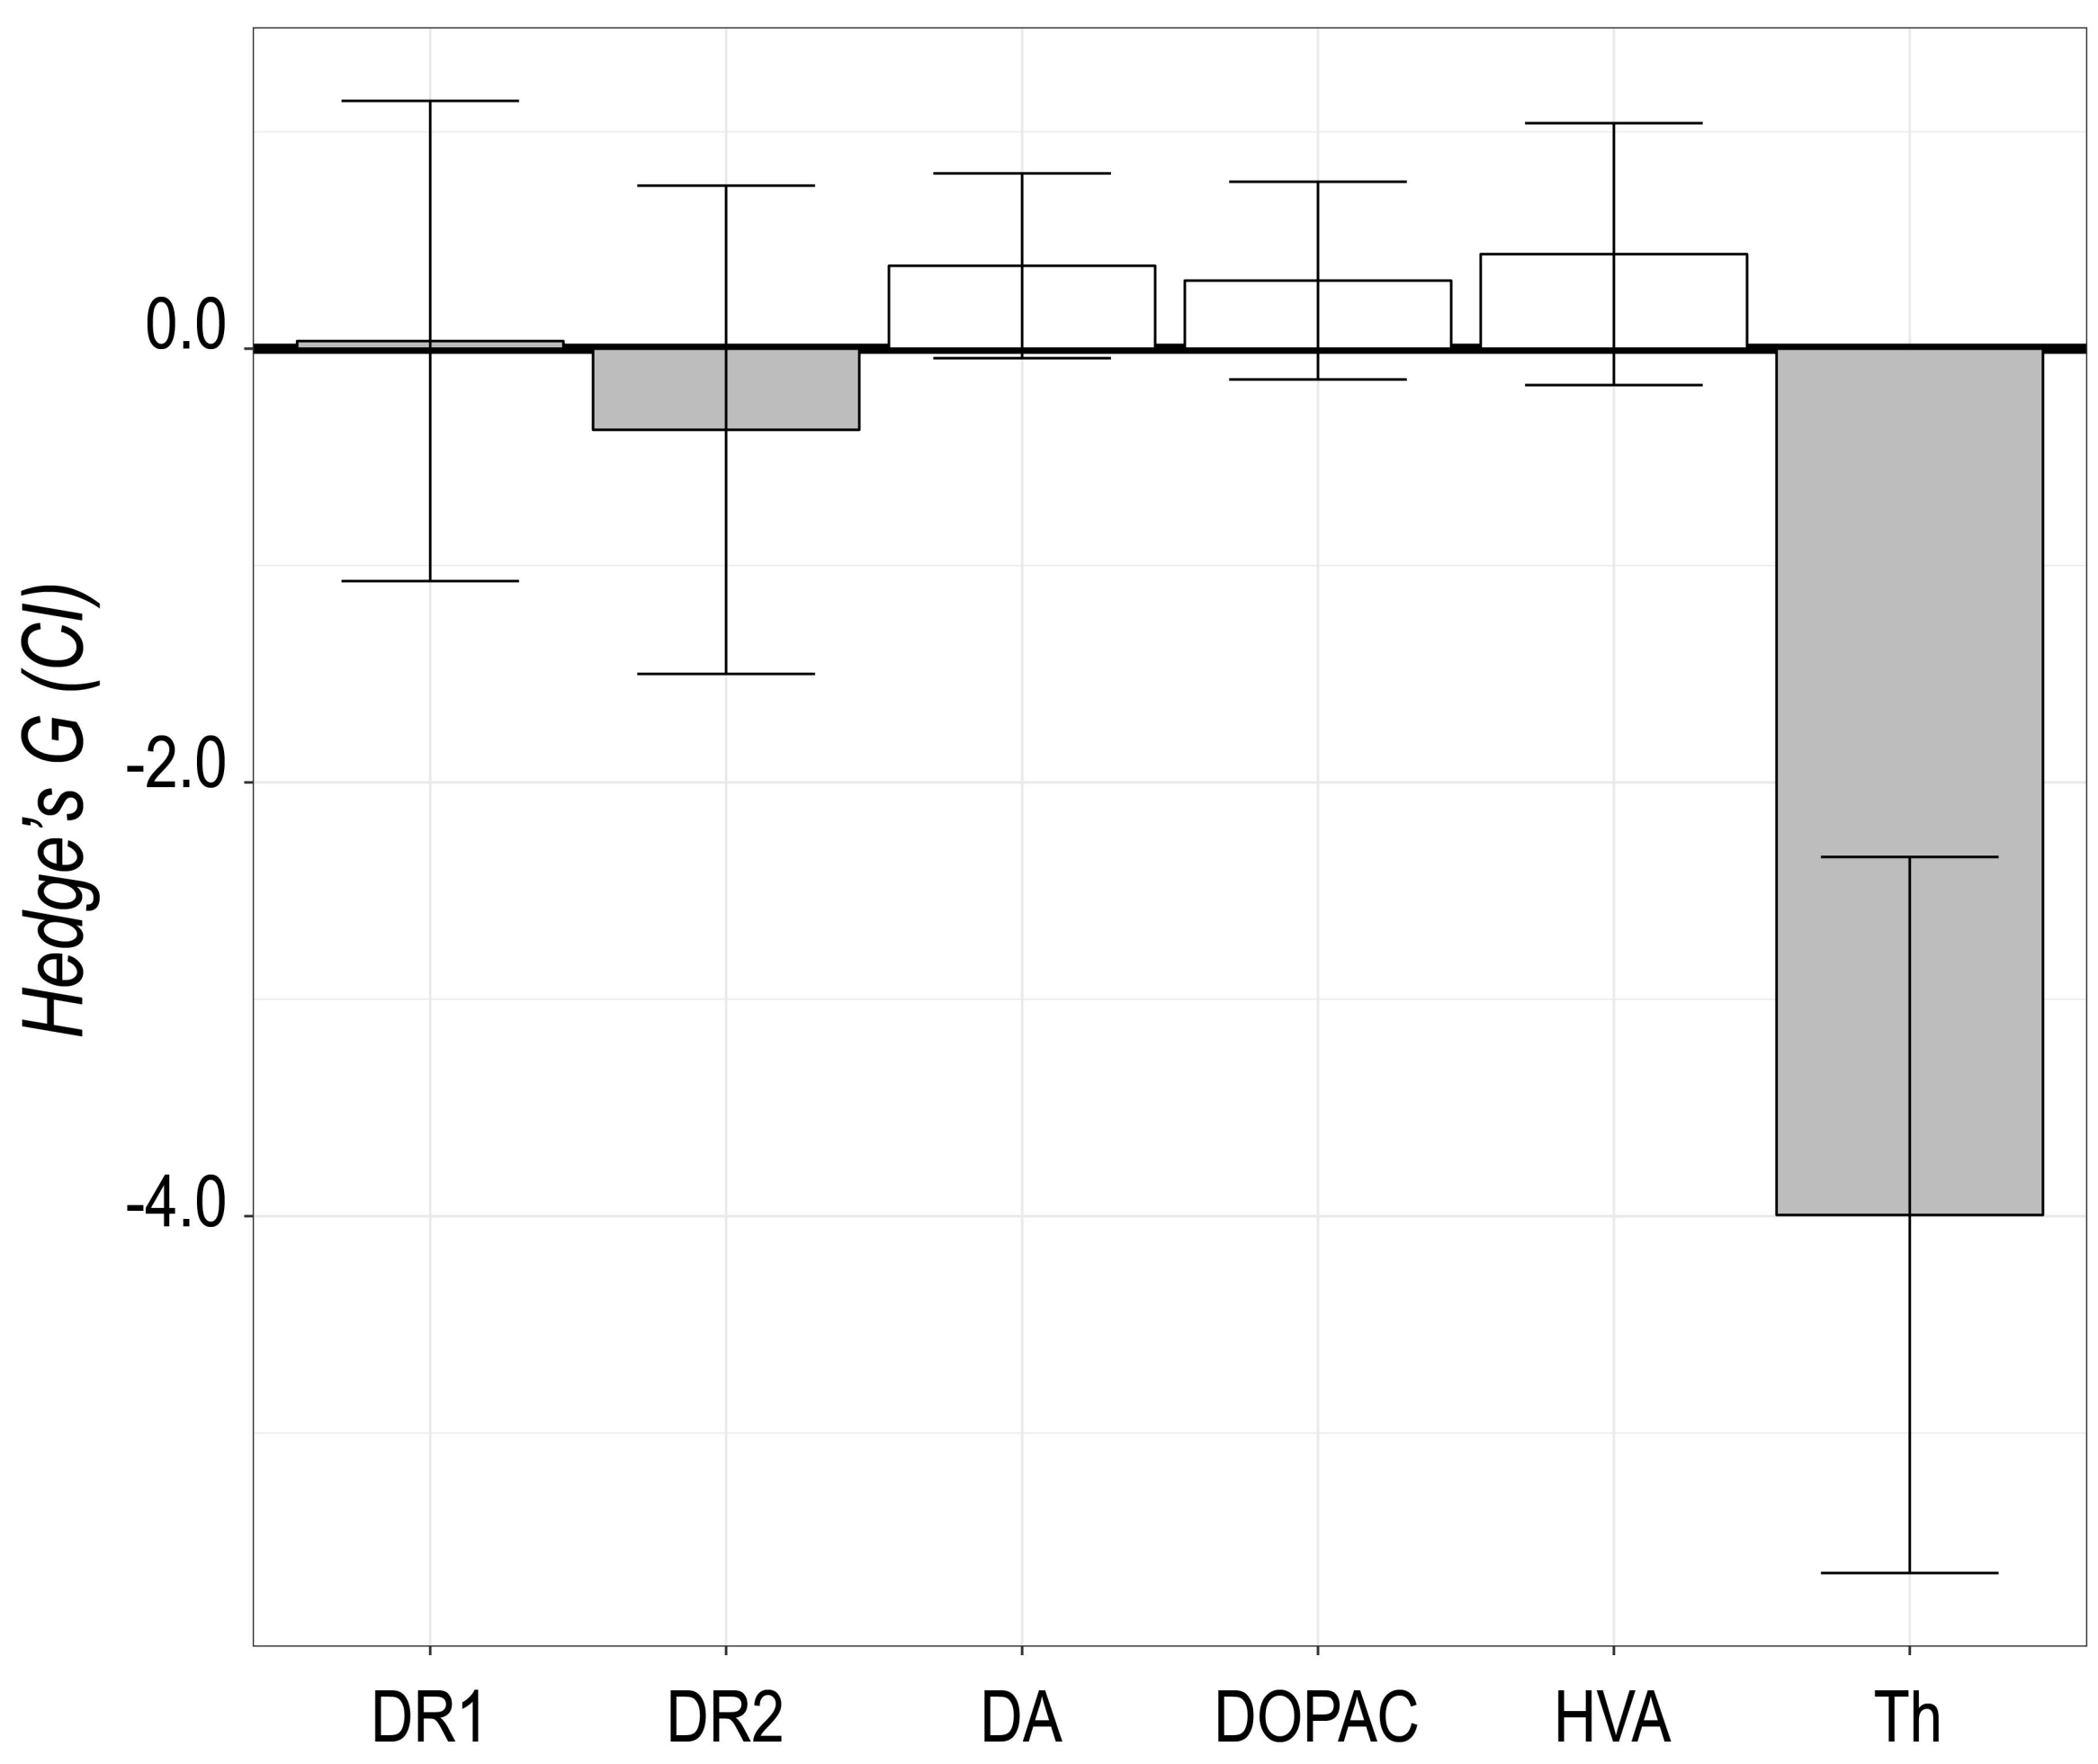

### Legend

The combination outcome\*area had sufficient comparisons for quantitative evaluation:

- No
- Yes

*prenatal striatal DOPAC*

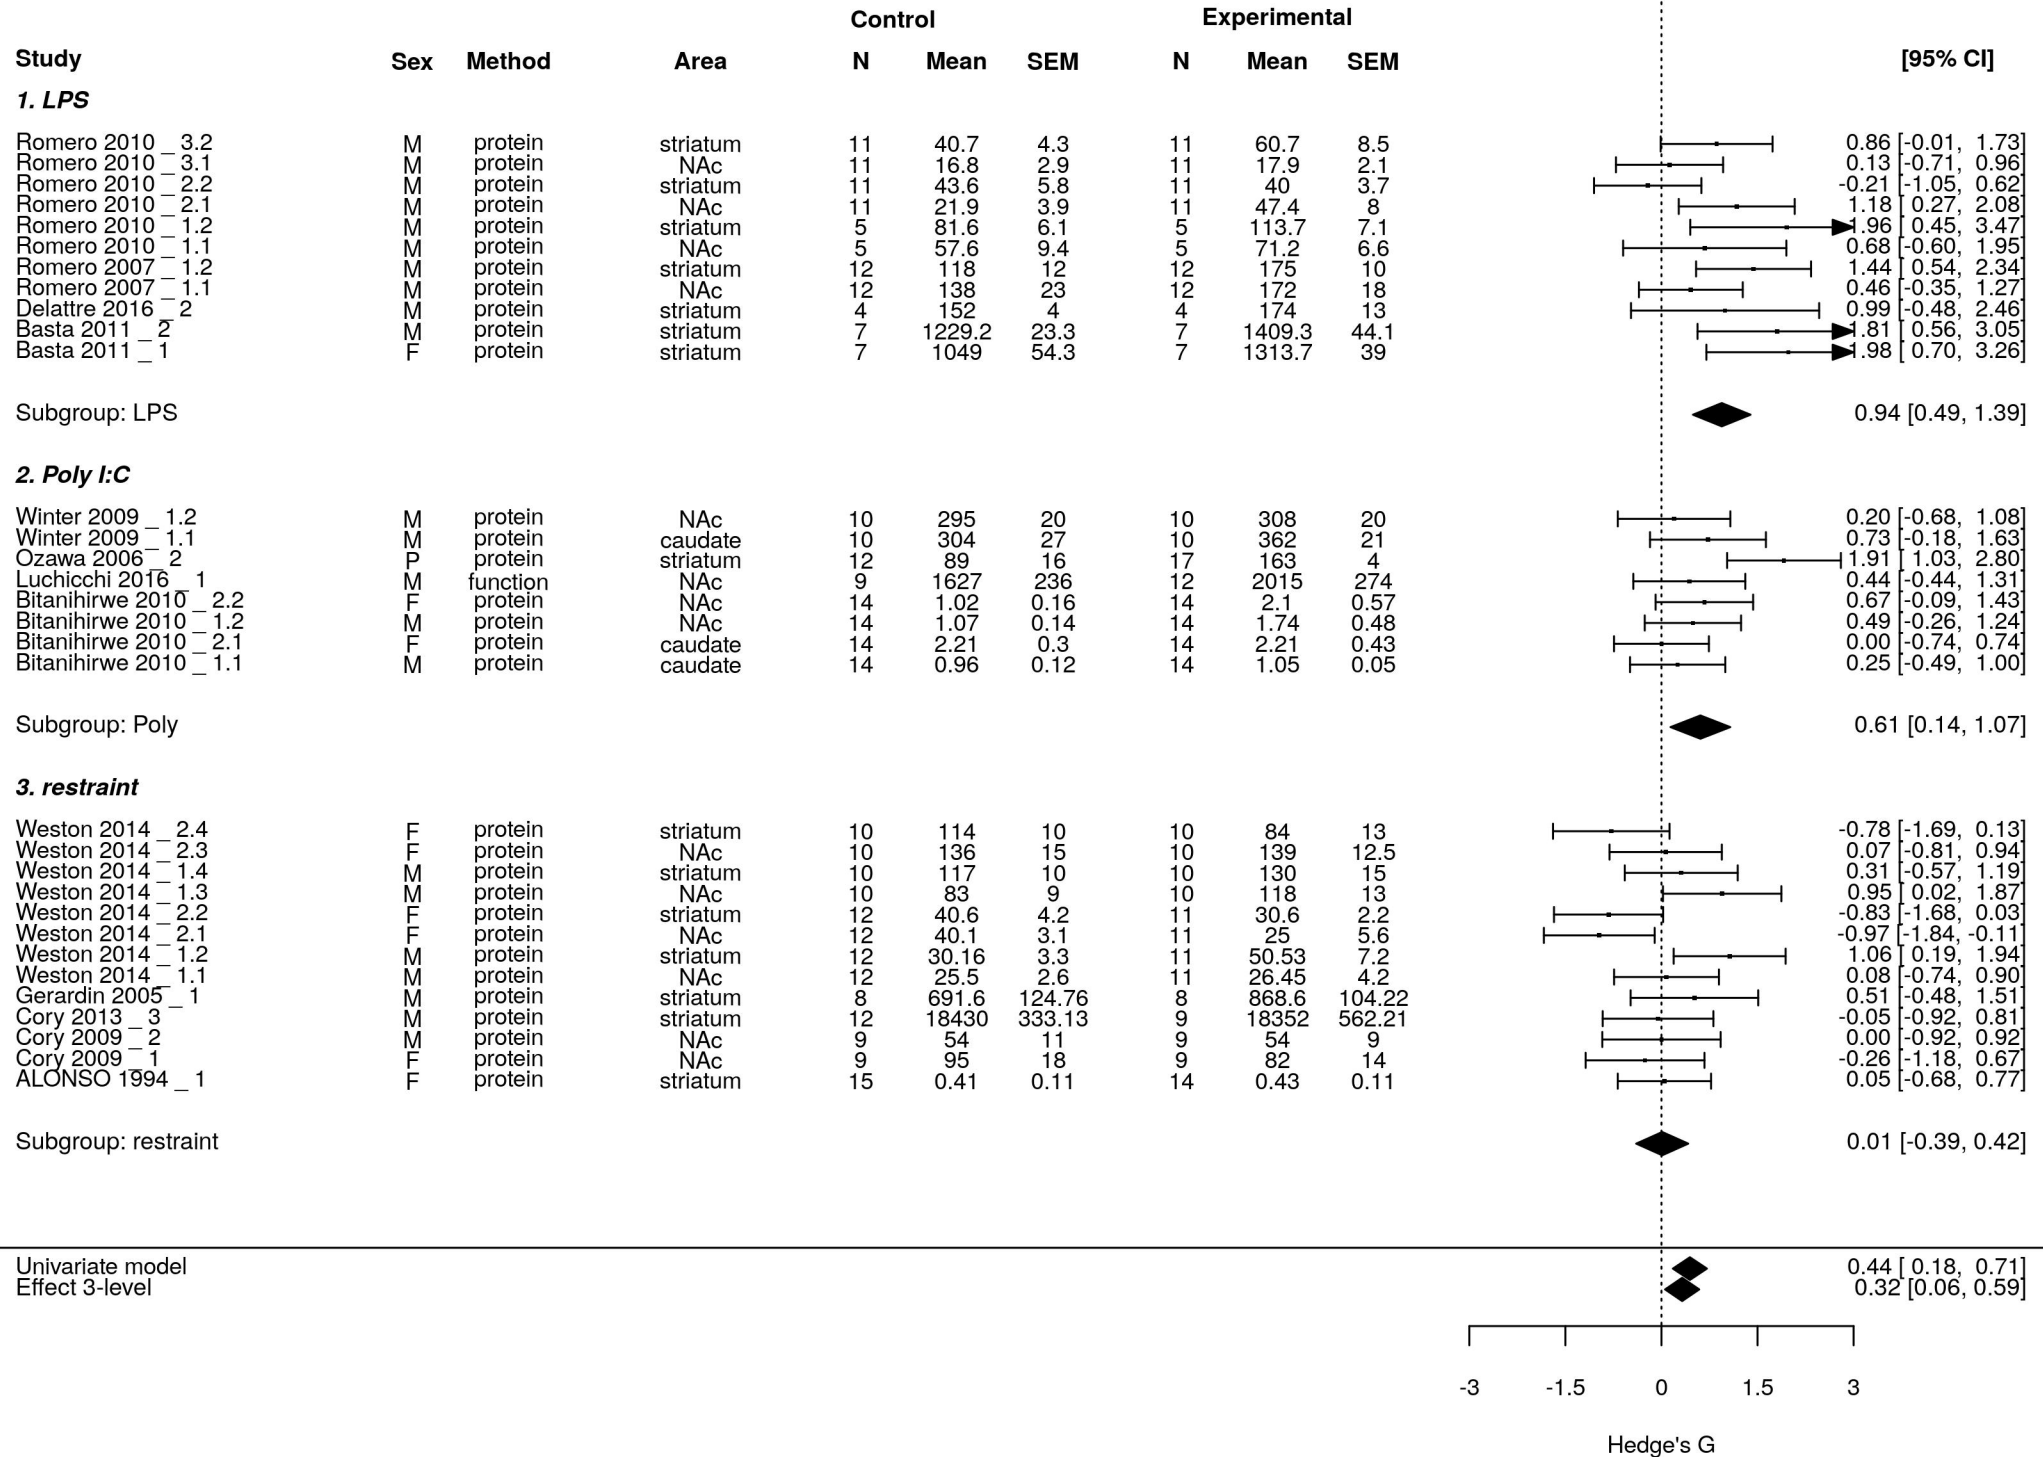

Study \_ exp

[95% CI]

bioRxiv preprint doi: <https://doi.org/10.1101/372441>; this version posted July 19, 2018. The copyright holder for this preprint (certified by peer review) is the author/funder, who has granted bioRxiv a license to display the preprint in perpetuity. It is made available under aCC-BY-NC-ND 4.0 International license.

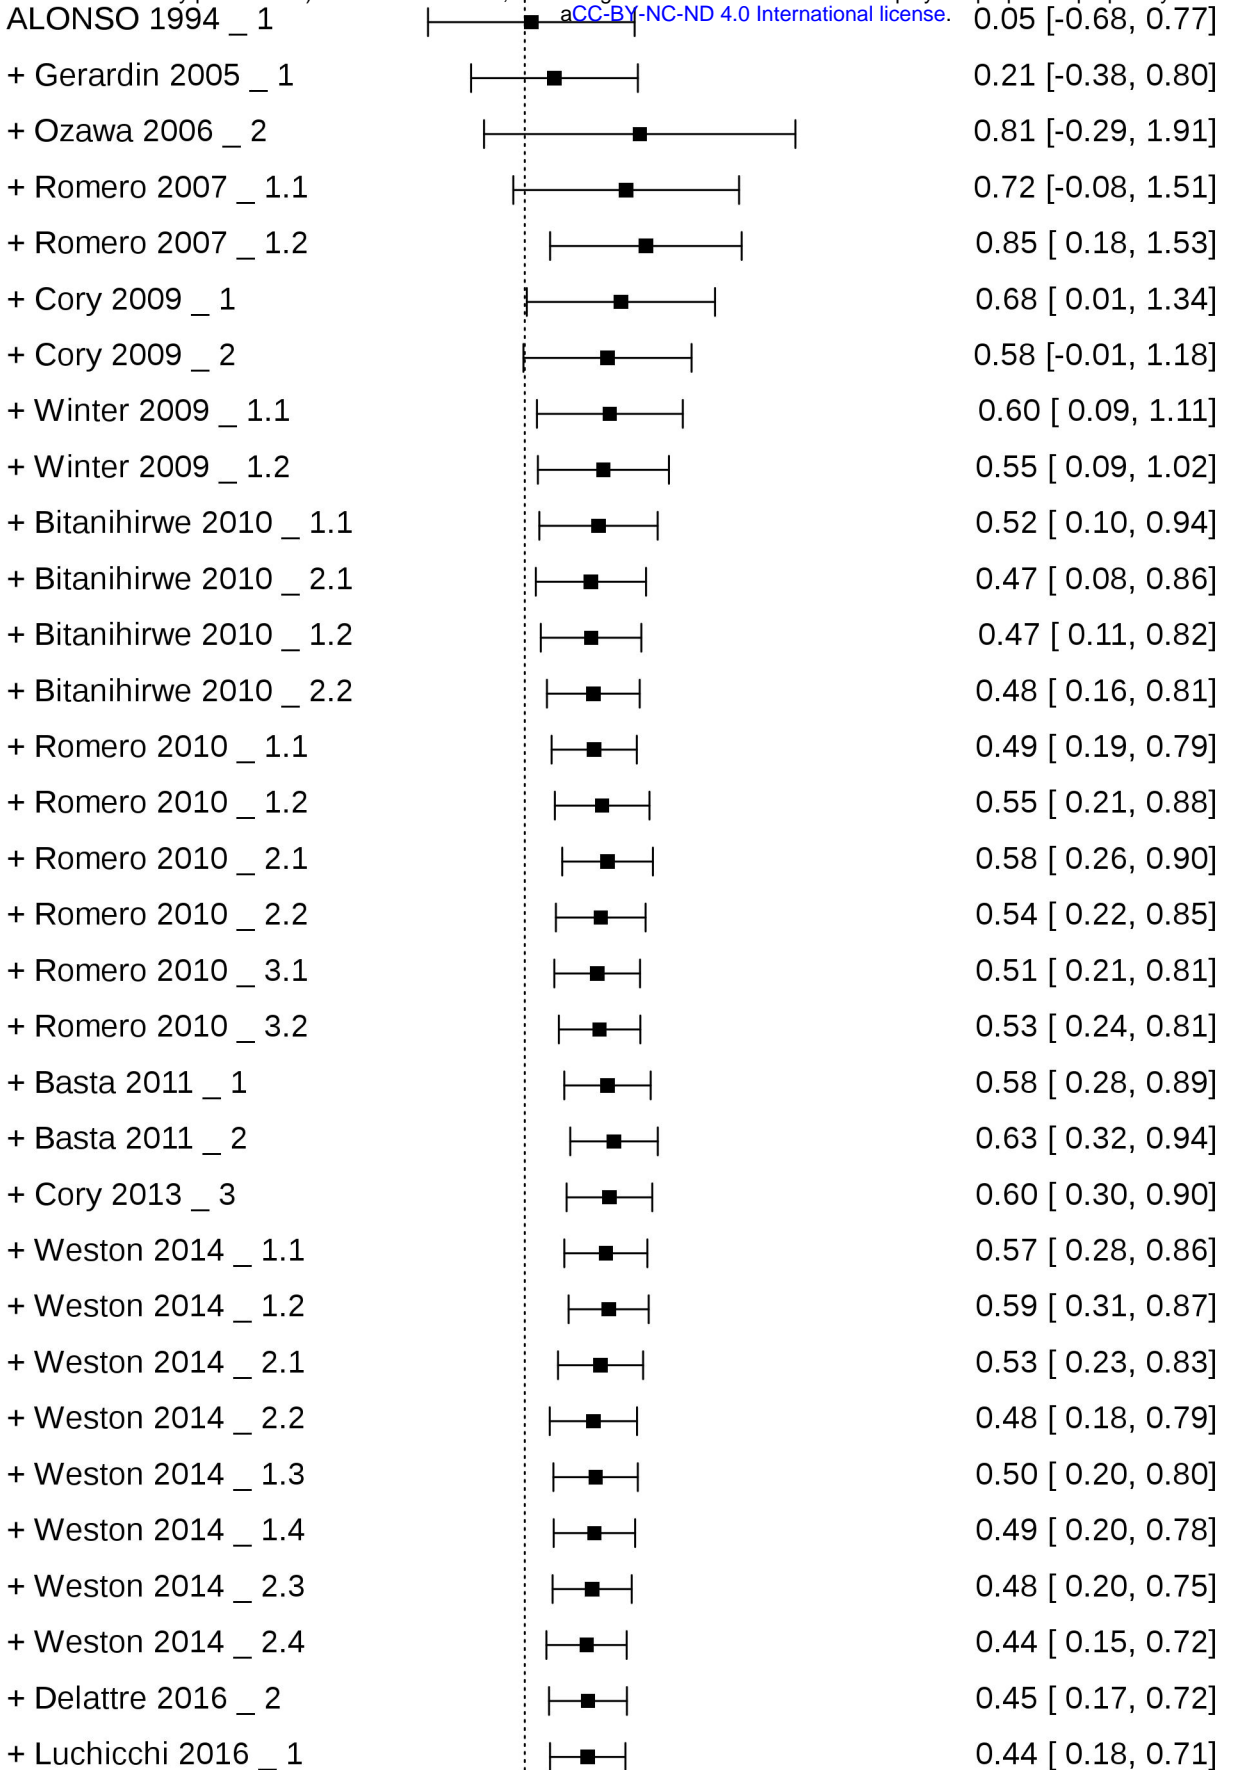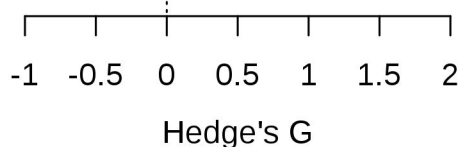

### Striatal area

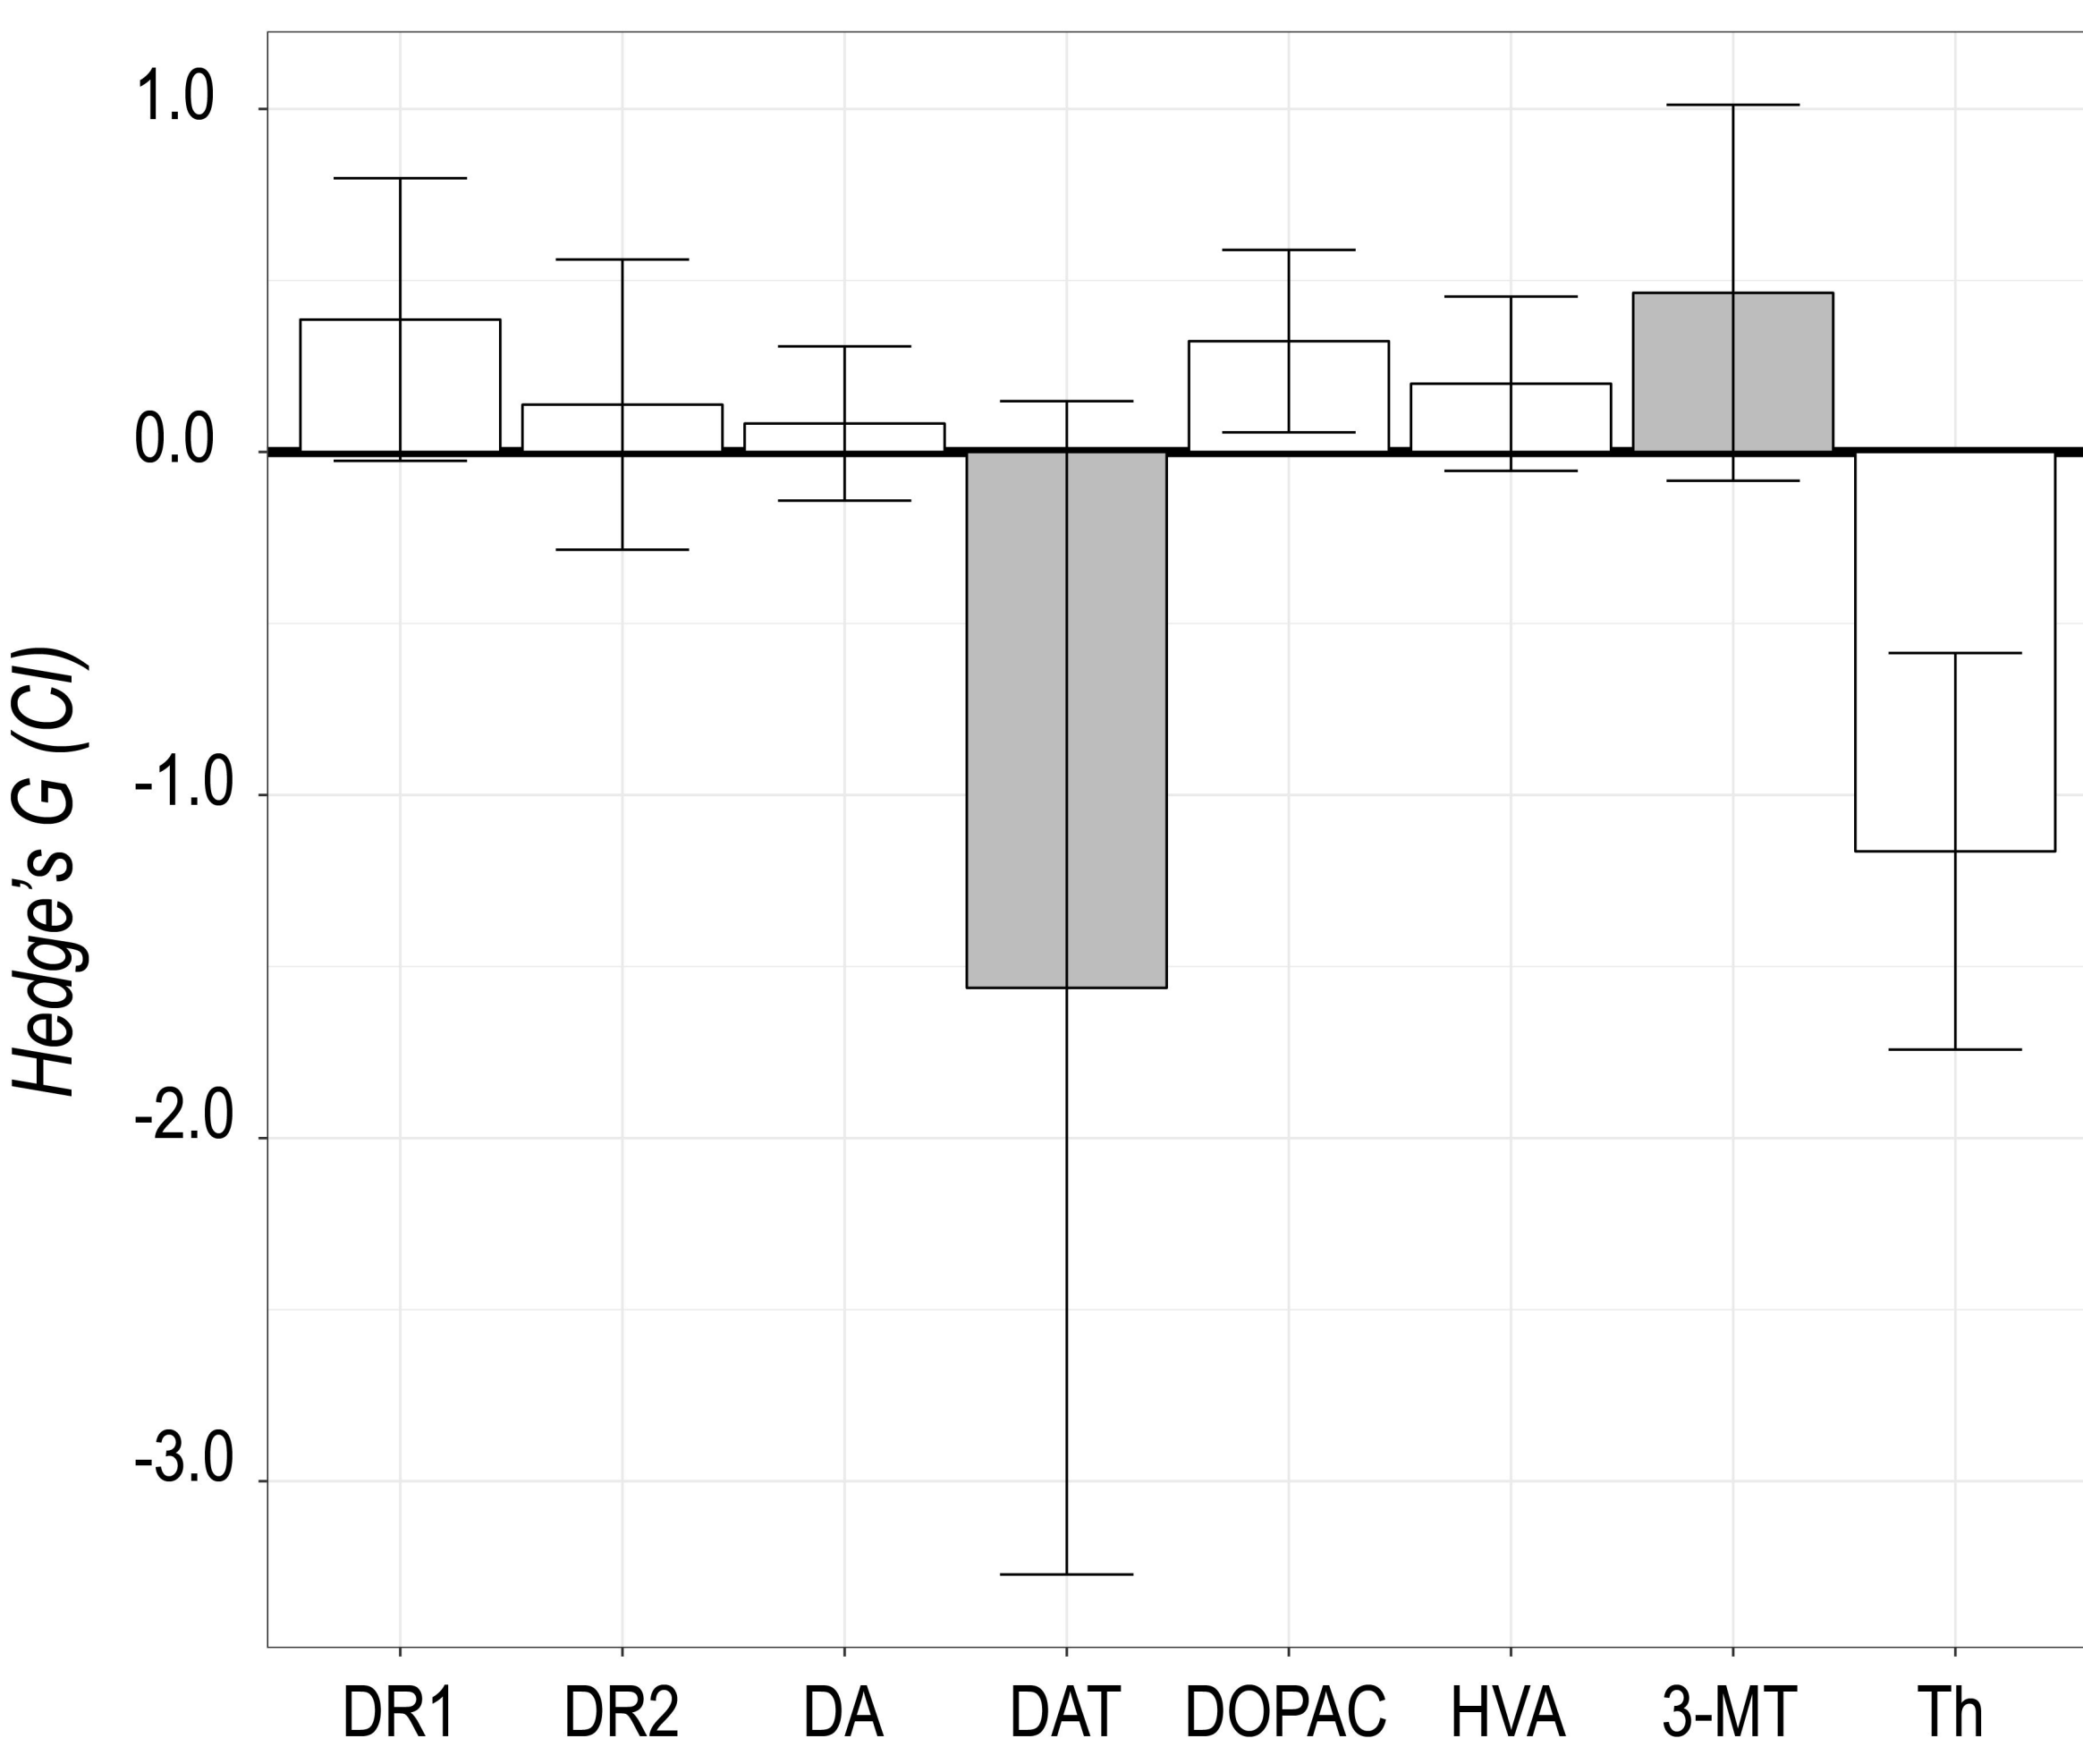

### Limbic area

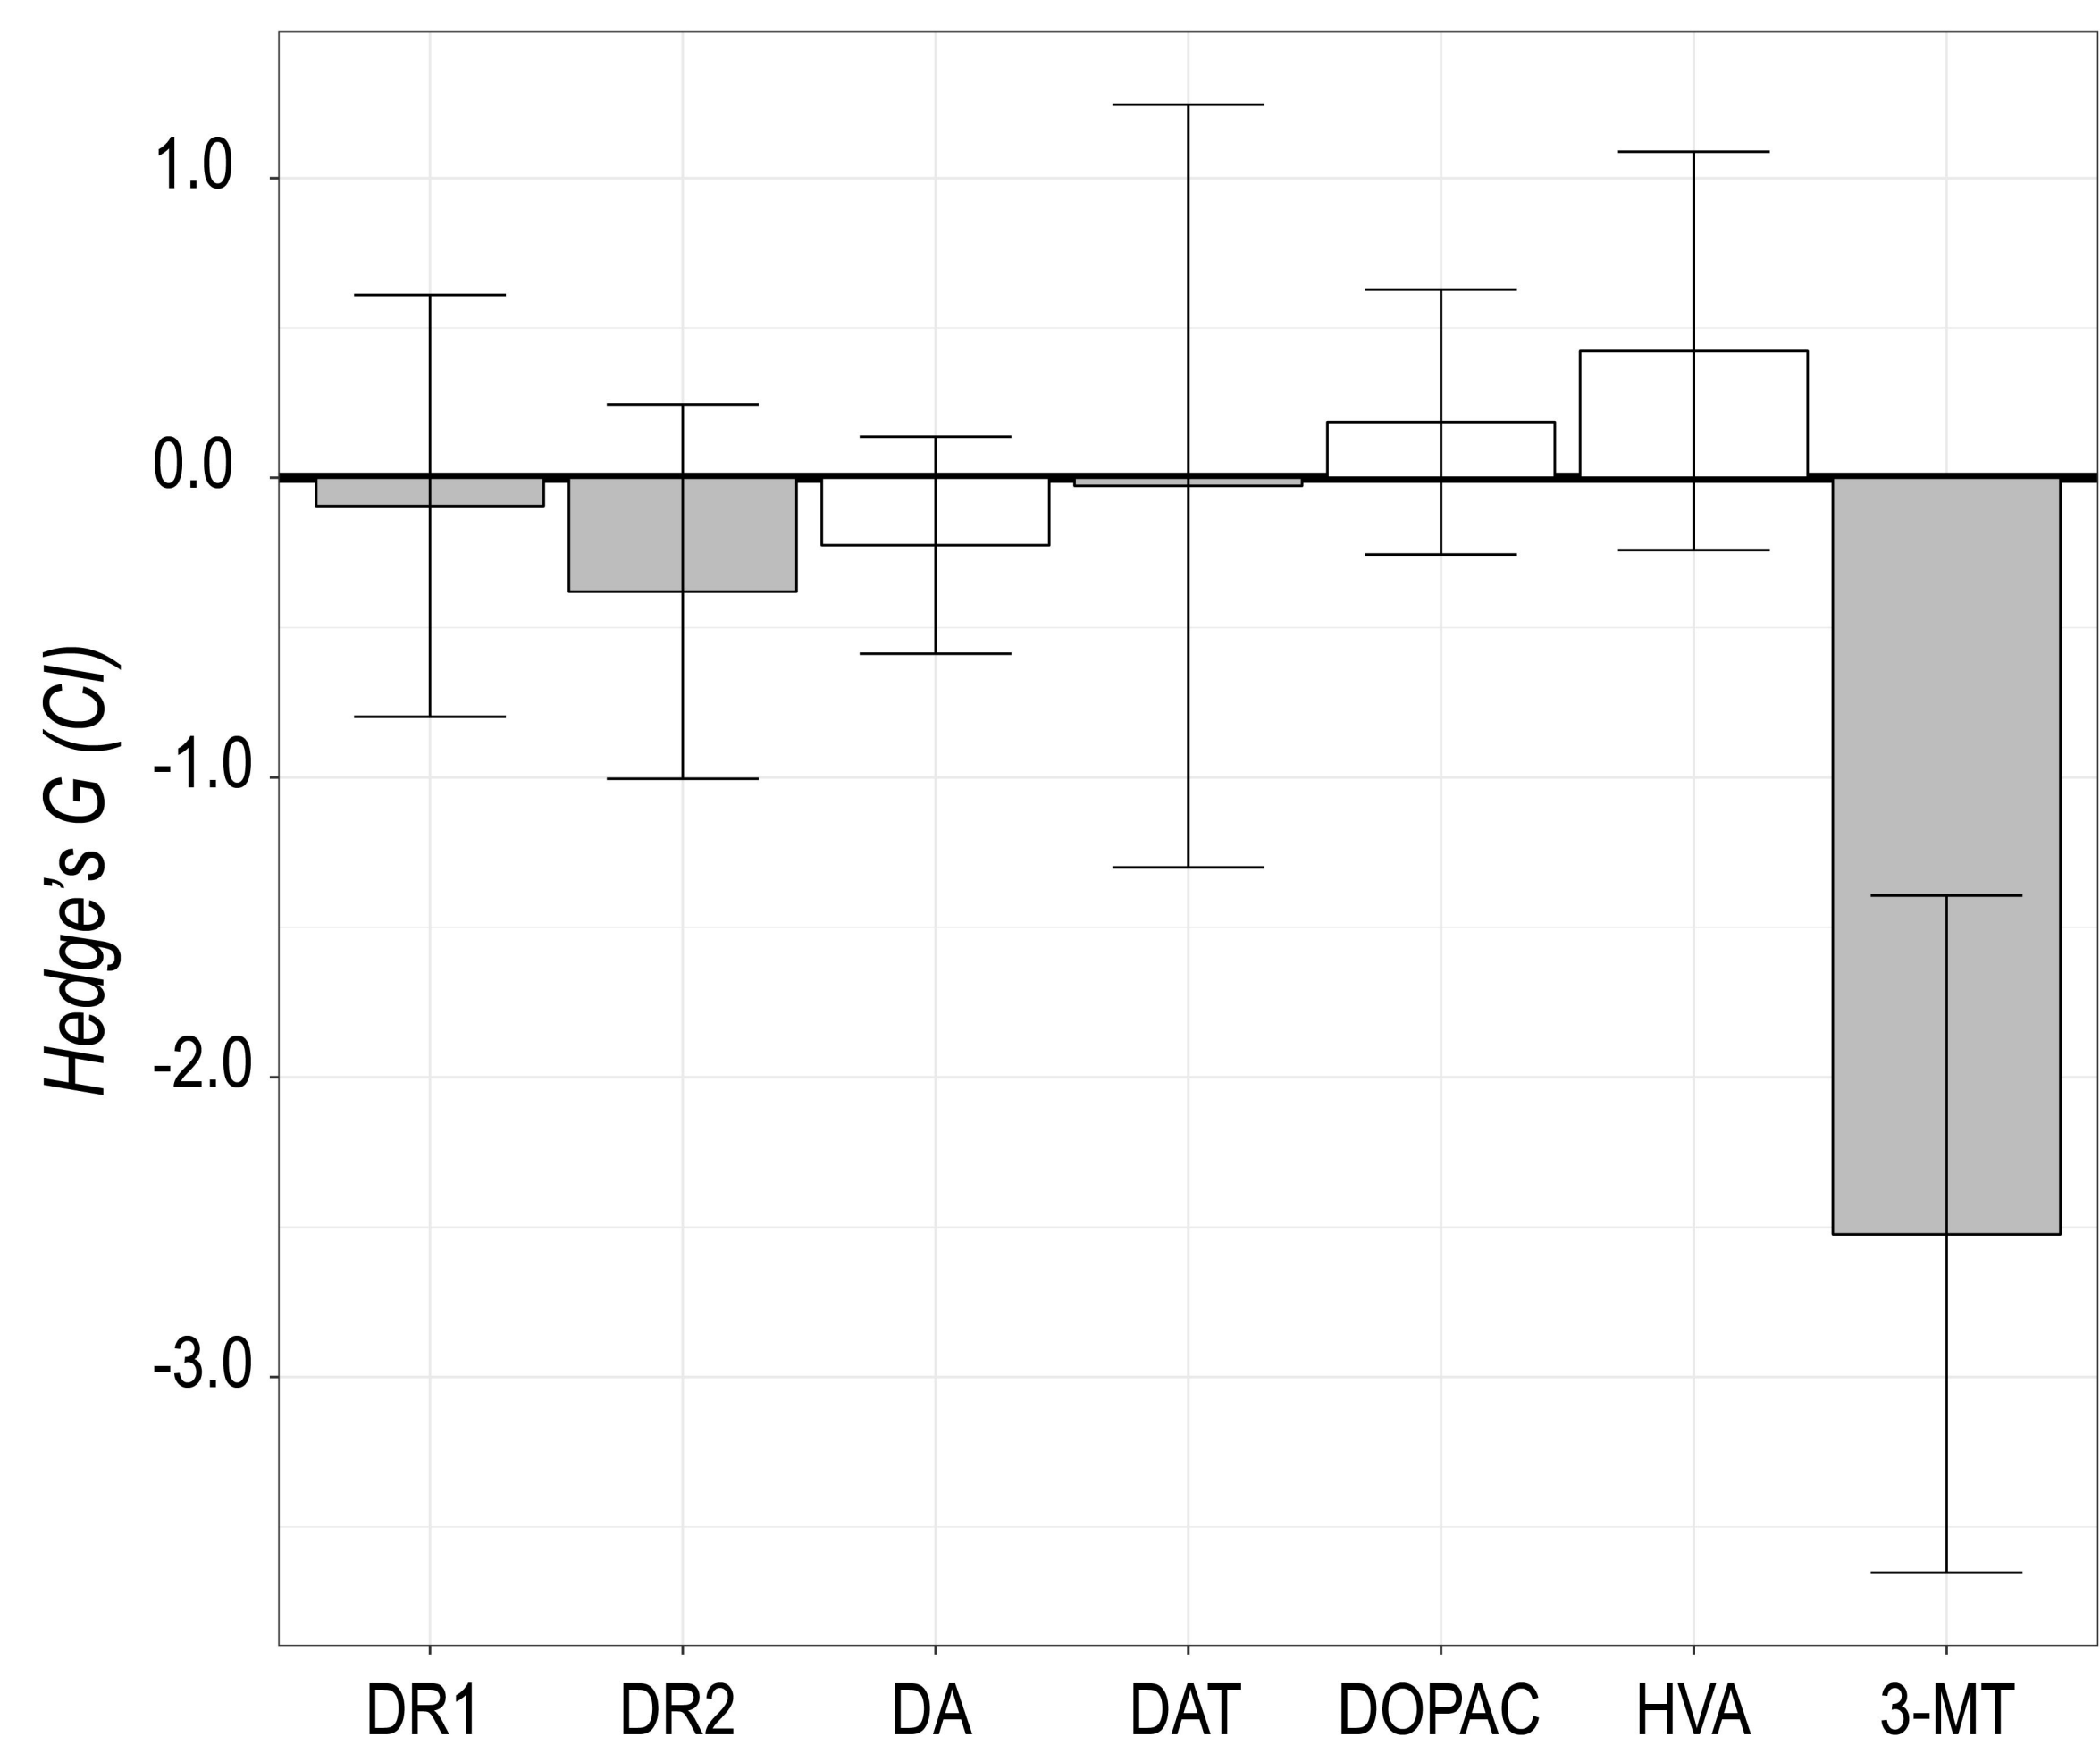

### PFC area

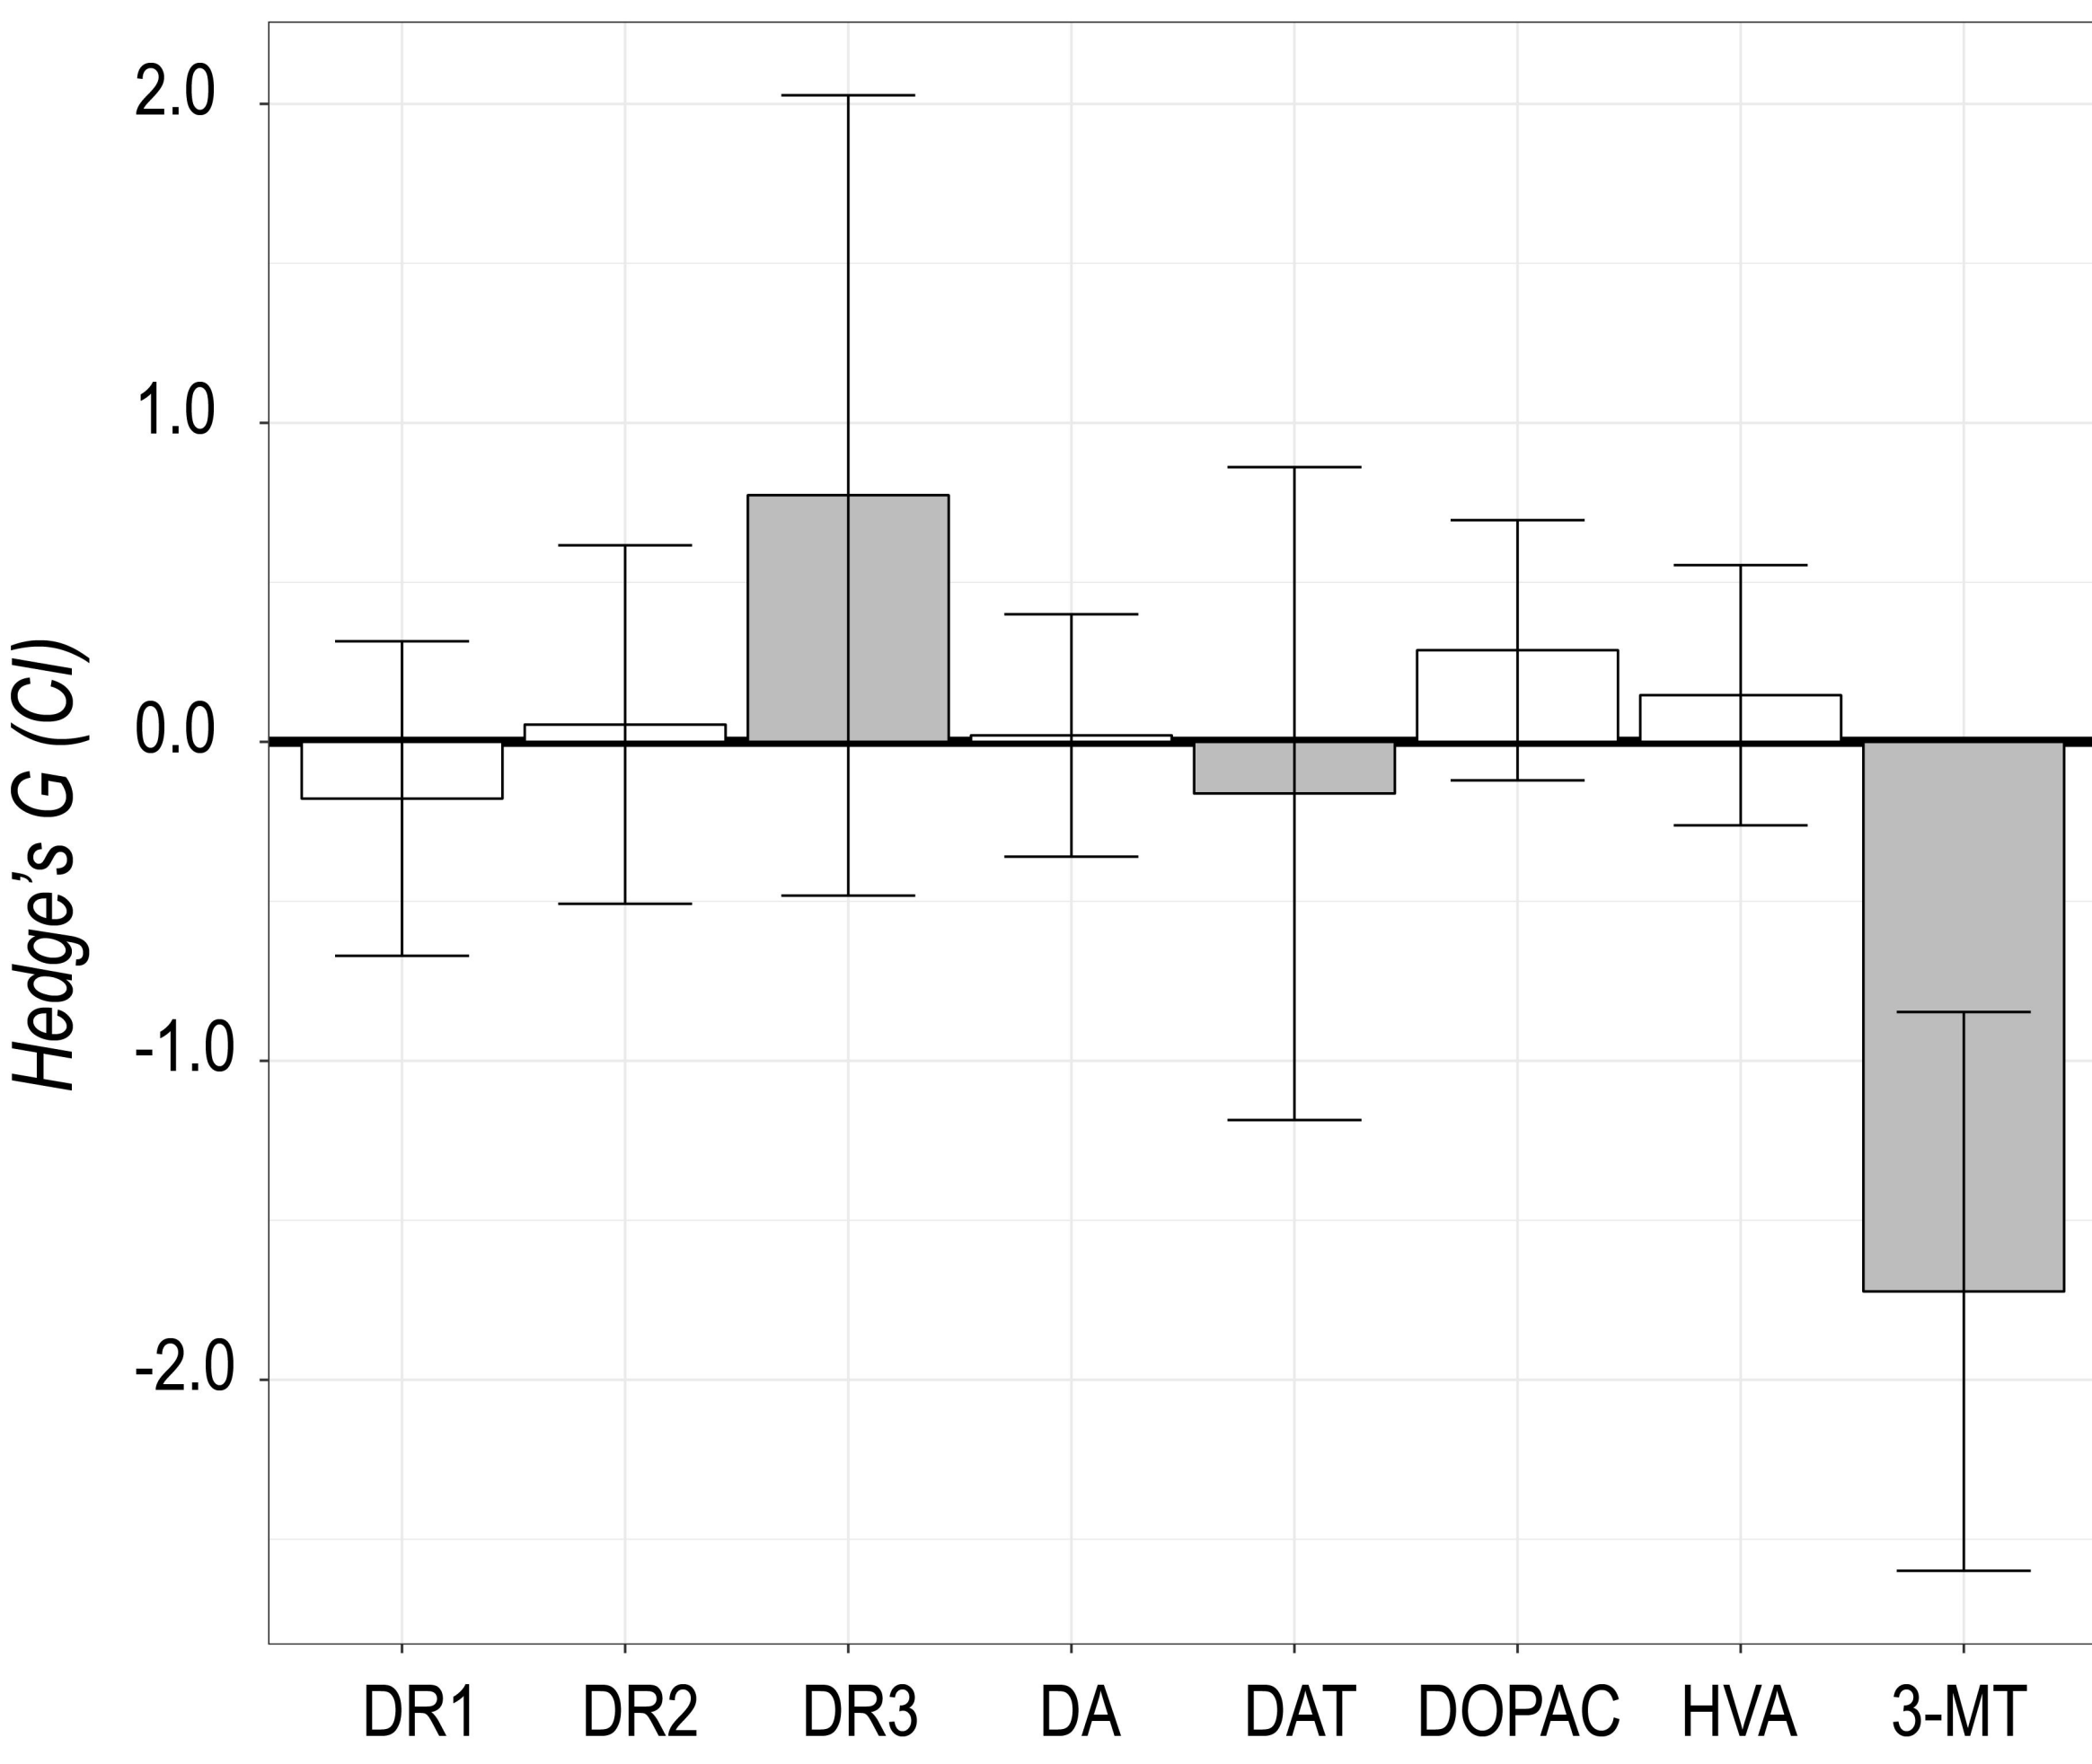

### VTA area

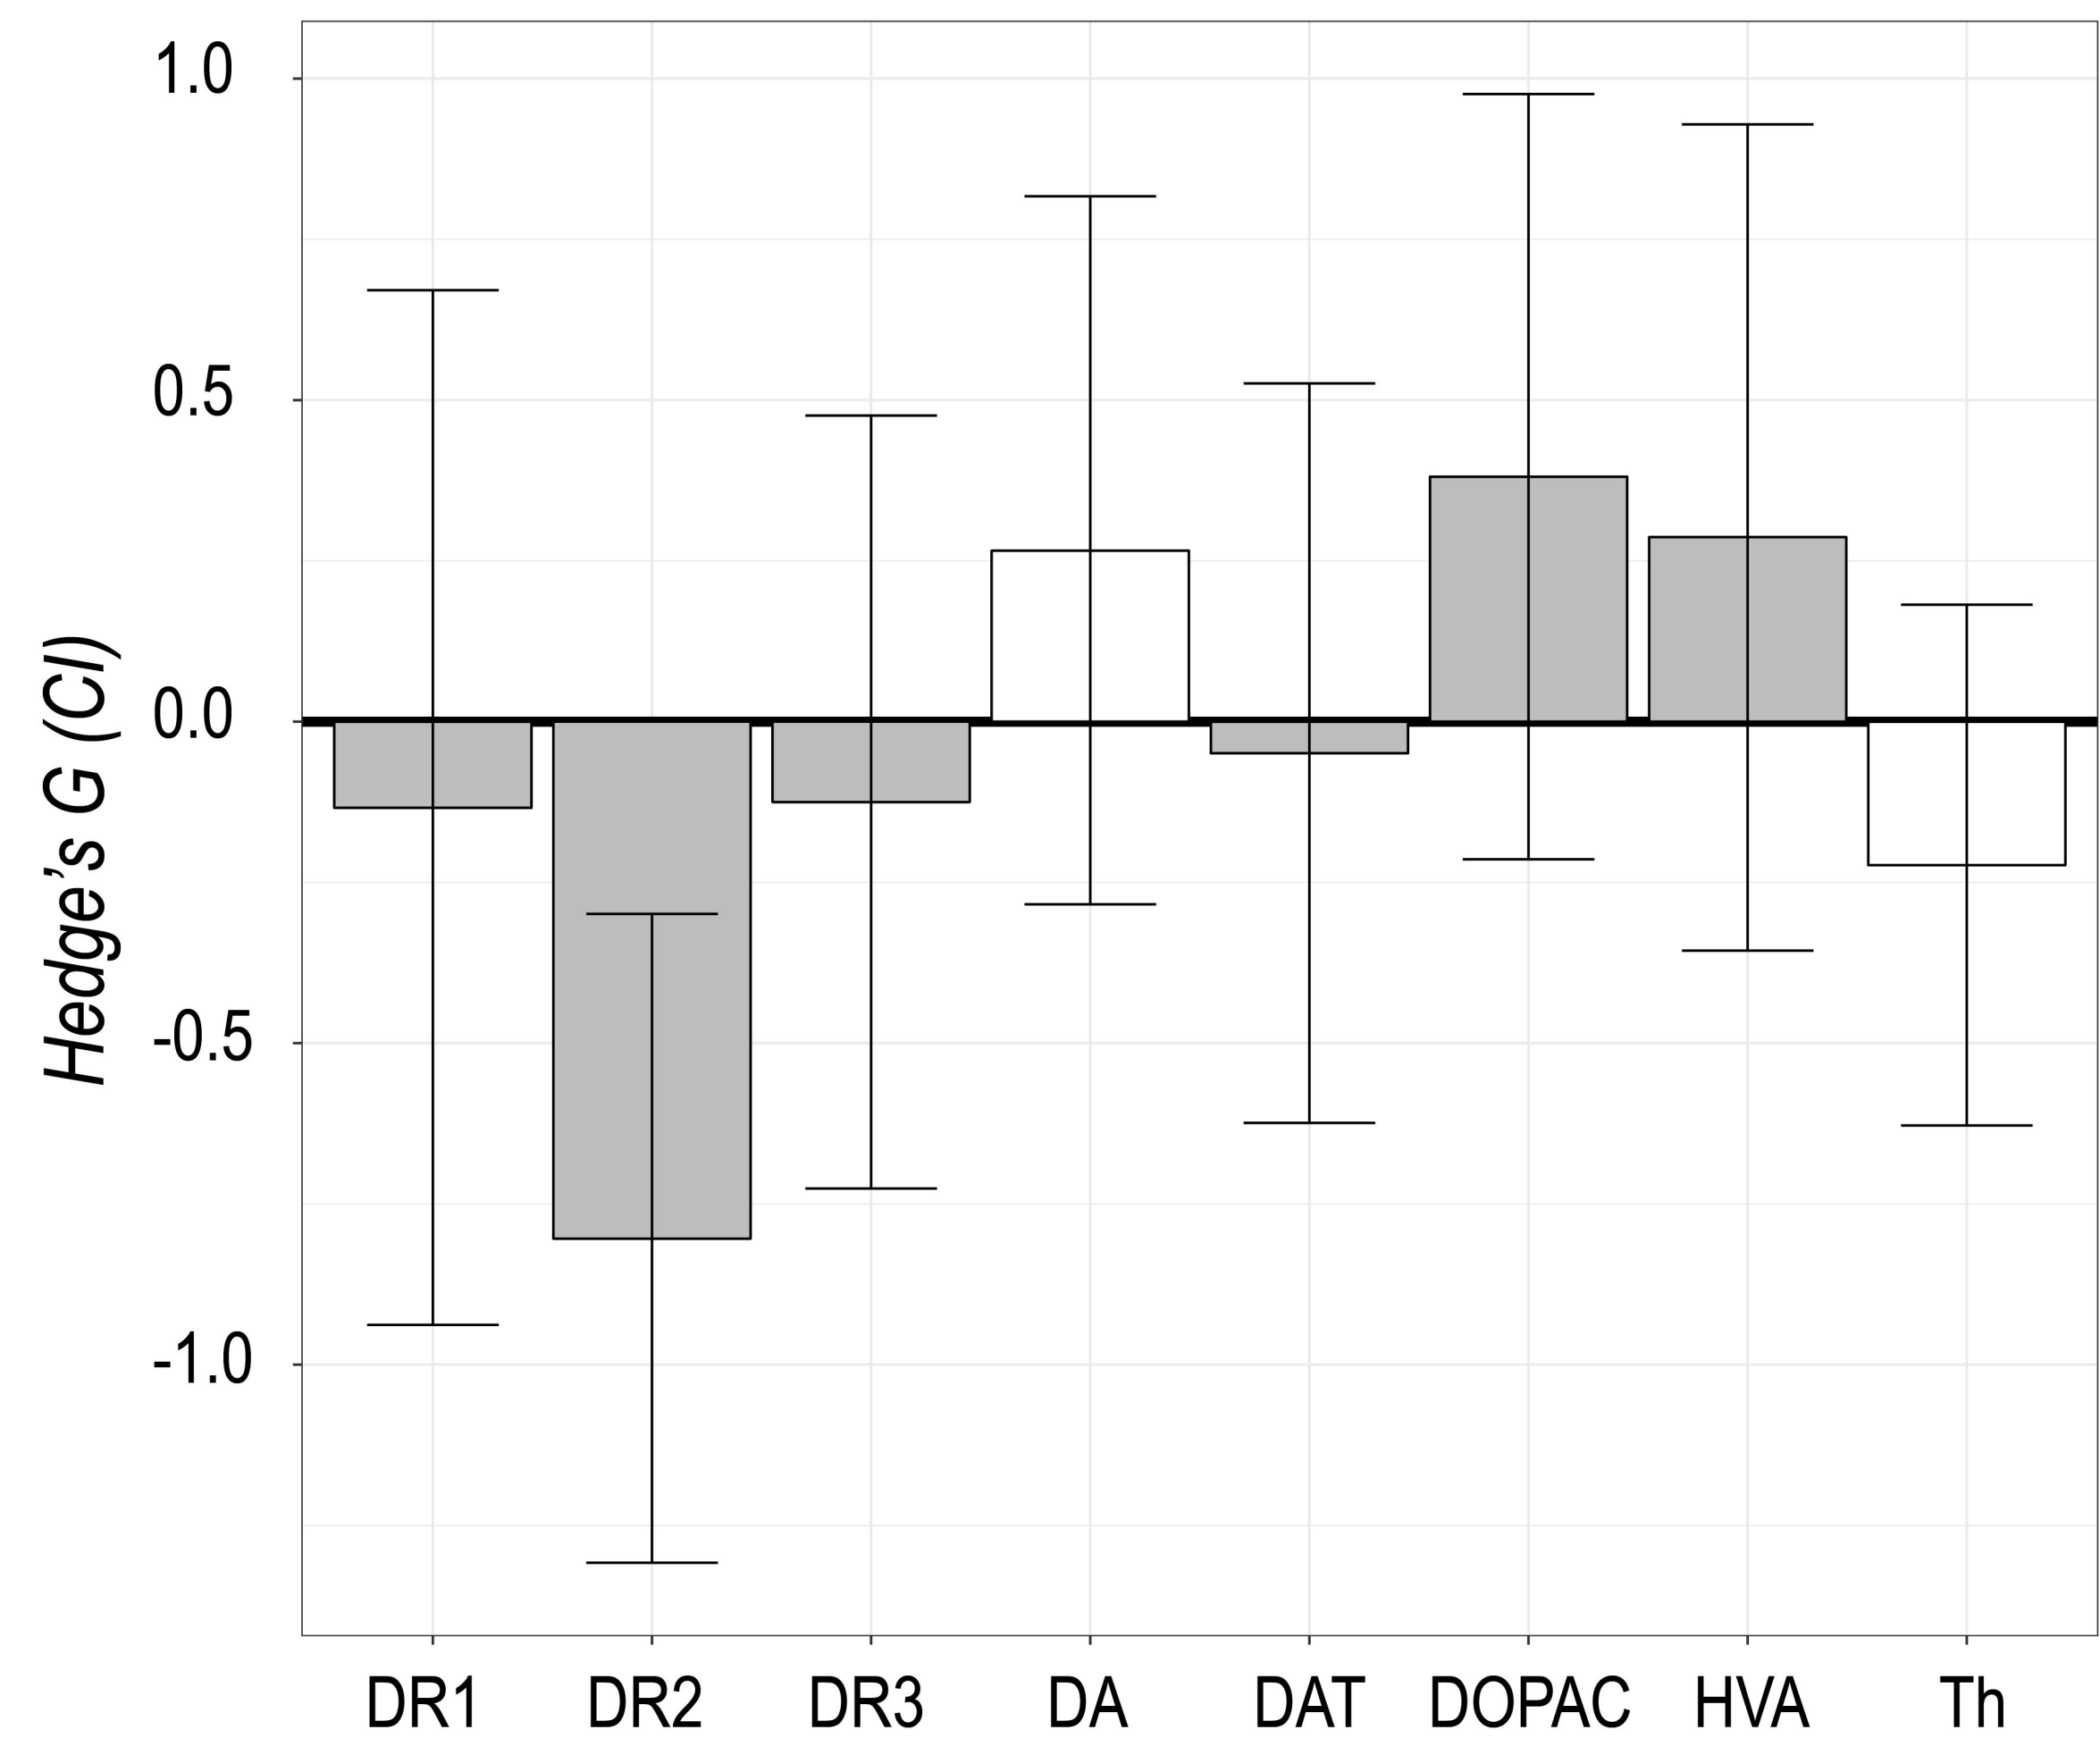

bioRxiv preprint doi: <https://doi.org/10.1101/072441>; this version posted July 19, 2018. The copyright holder for this preprint (which was not certified by peer review) is the author/funder, who has granted bioRxiv a license to display the preprint in perpetuity. It is made available under aCC-BY-NC-ND 4.0 International license.

### Hypothalamic area

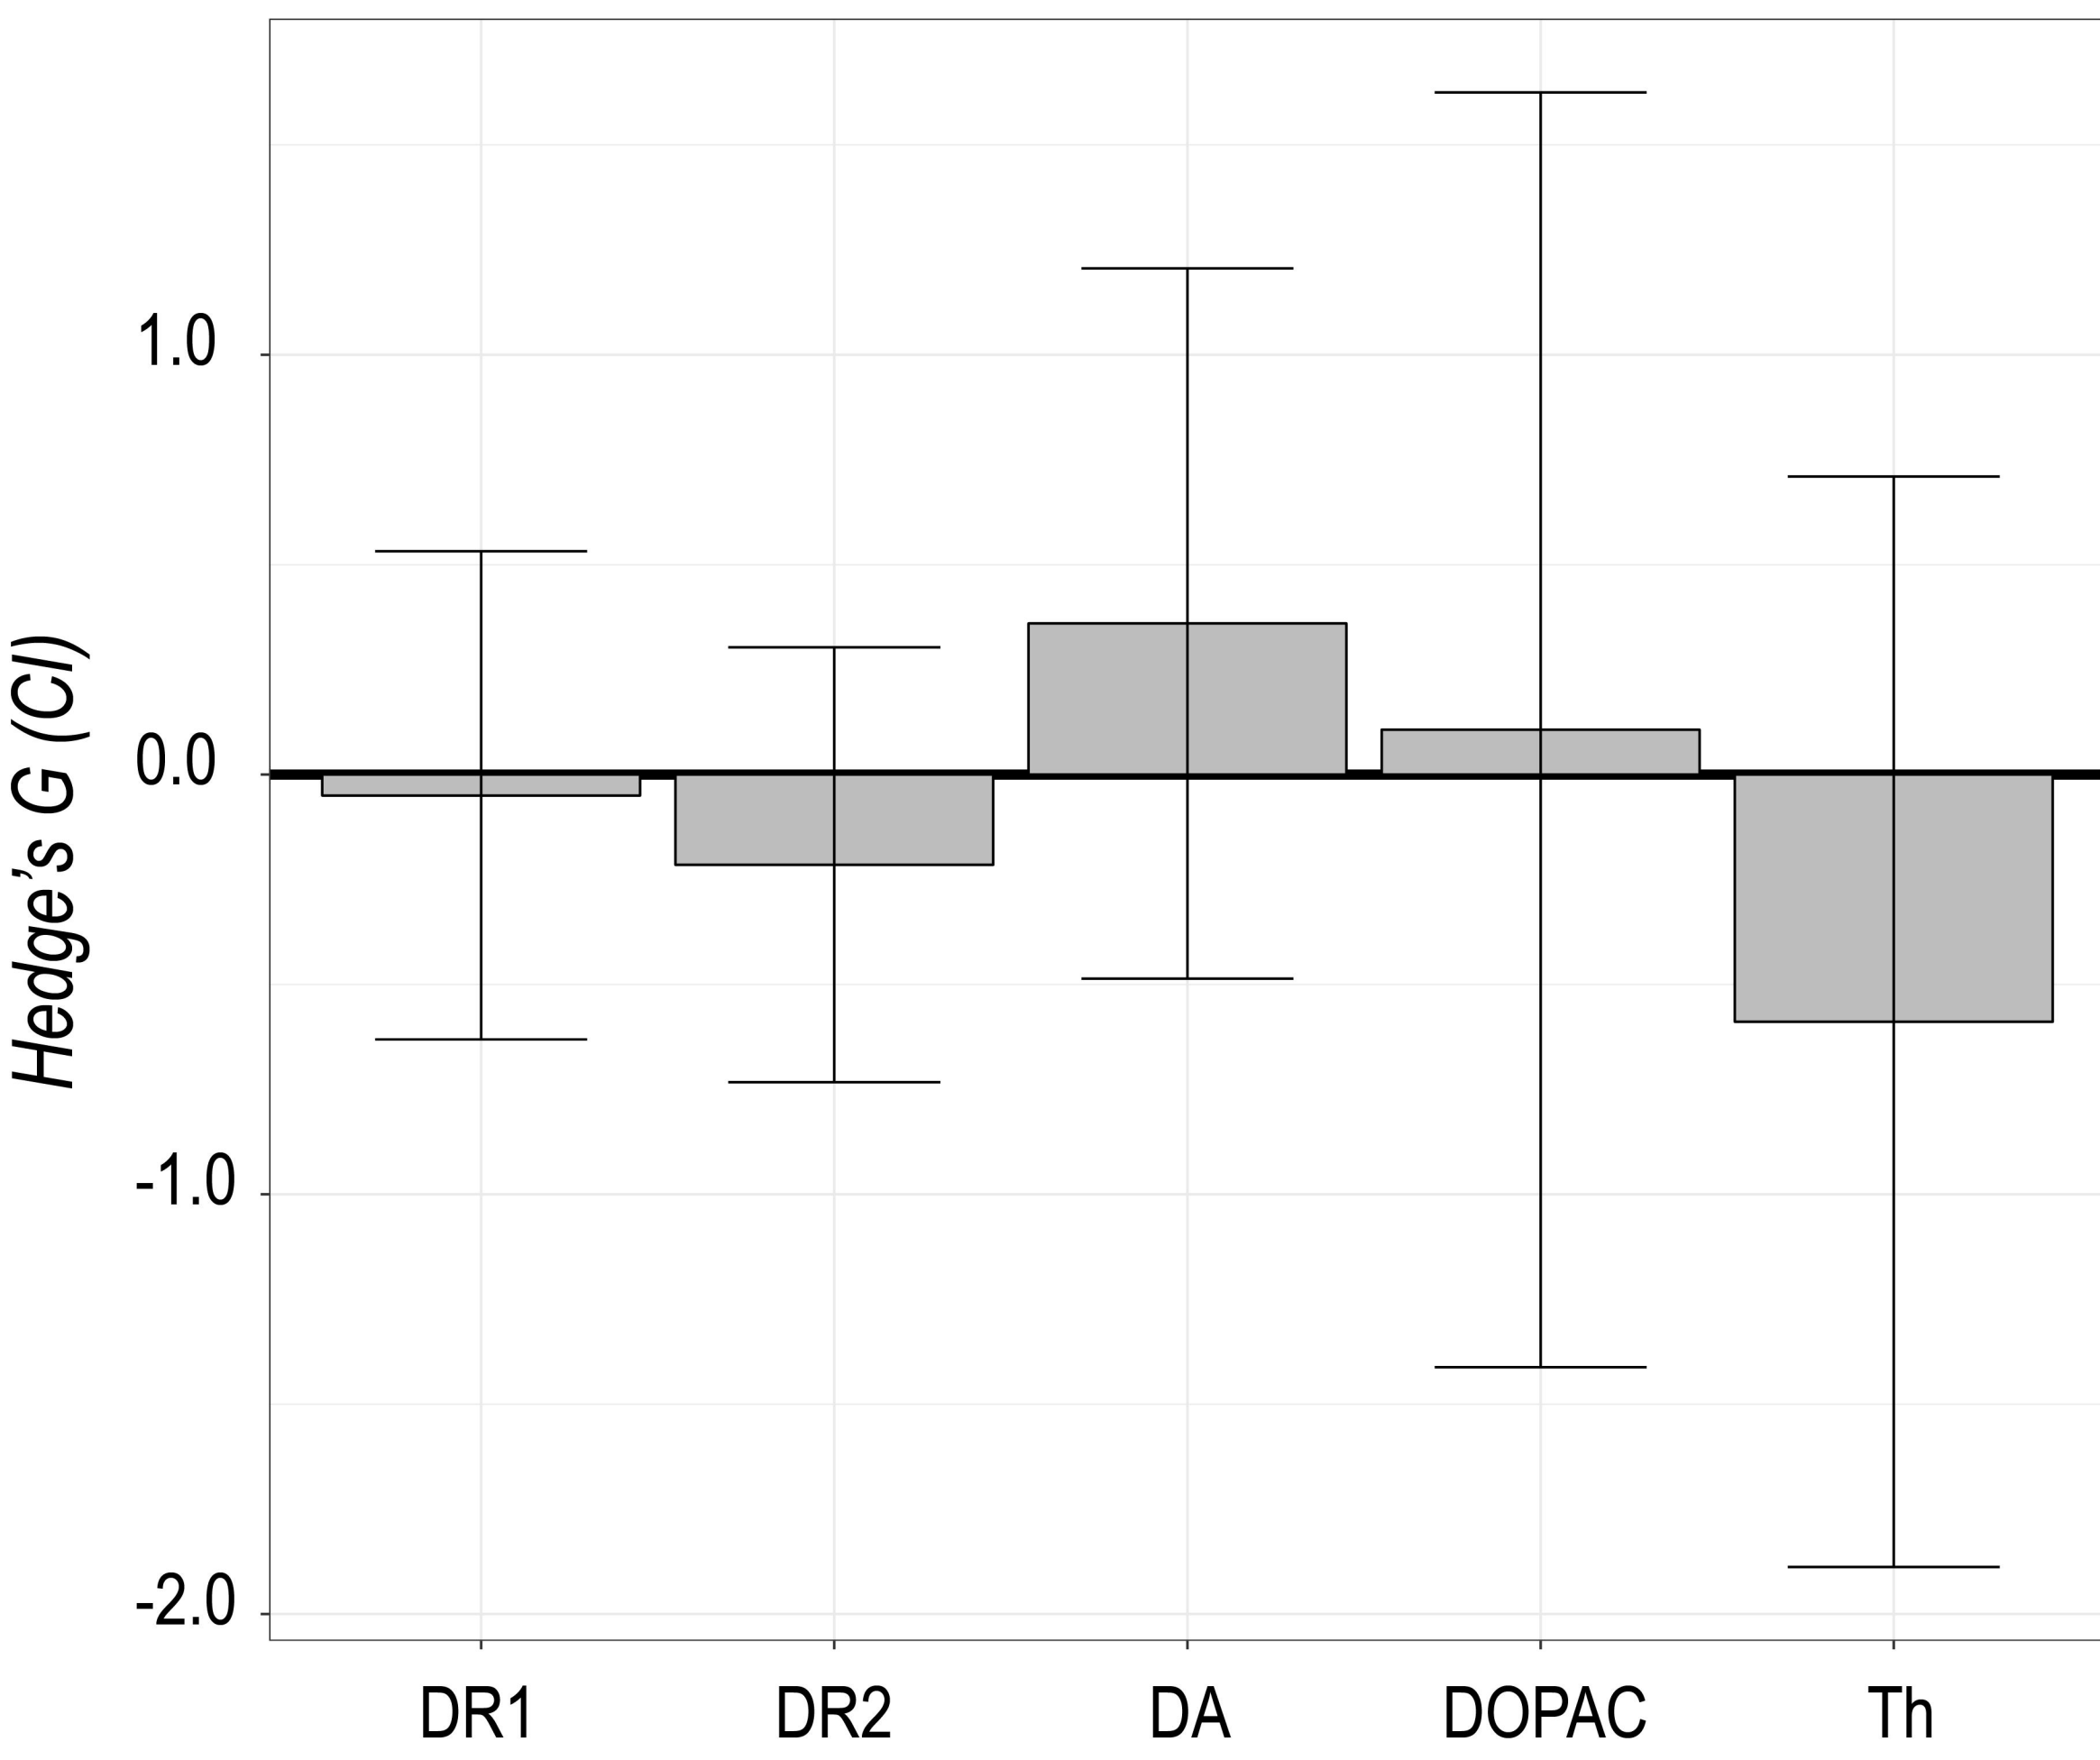

### Legend

The combination outcome\*area had sufficient comparisons for quantitative evaluation:

- No
- Yes



postnatal striatal DOPAC

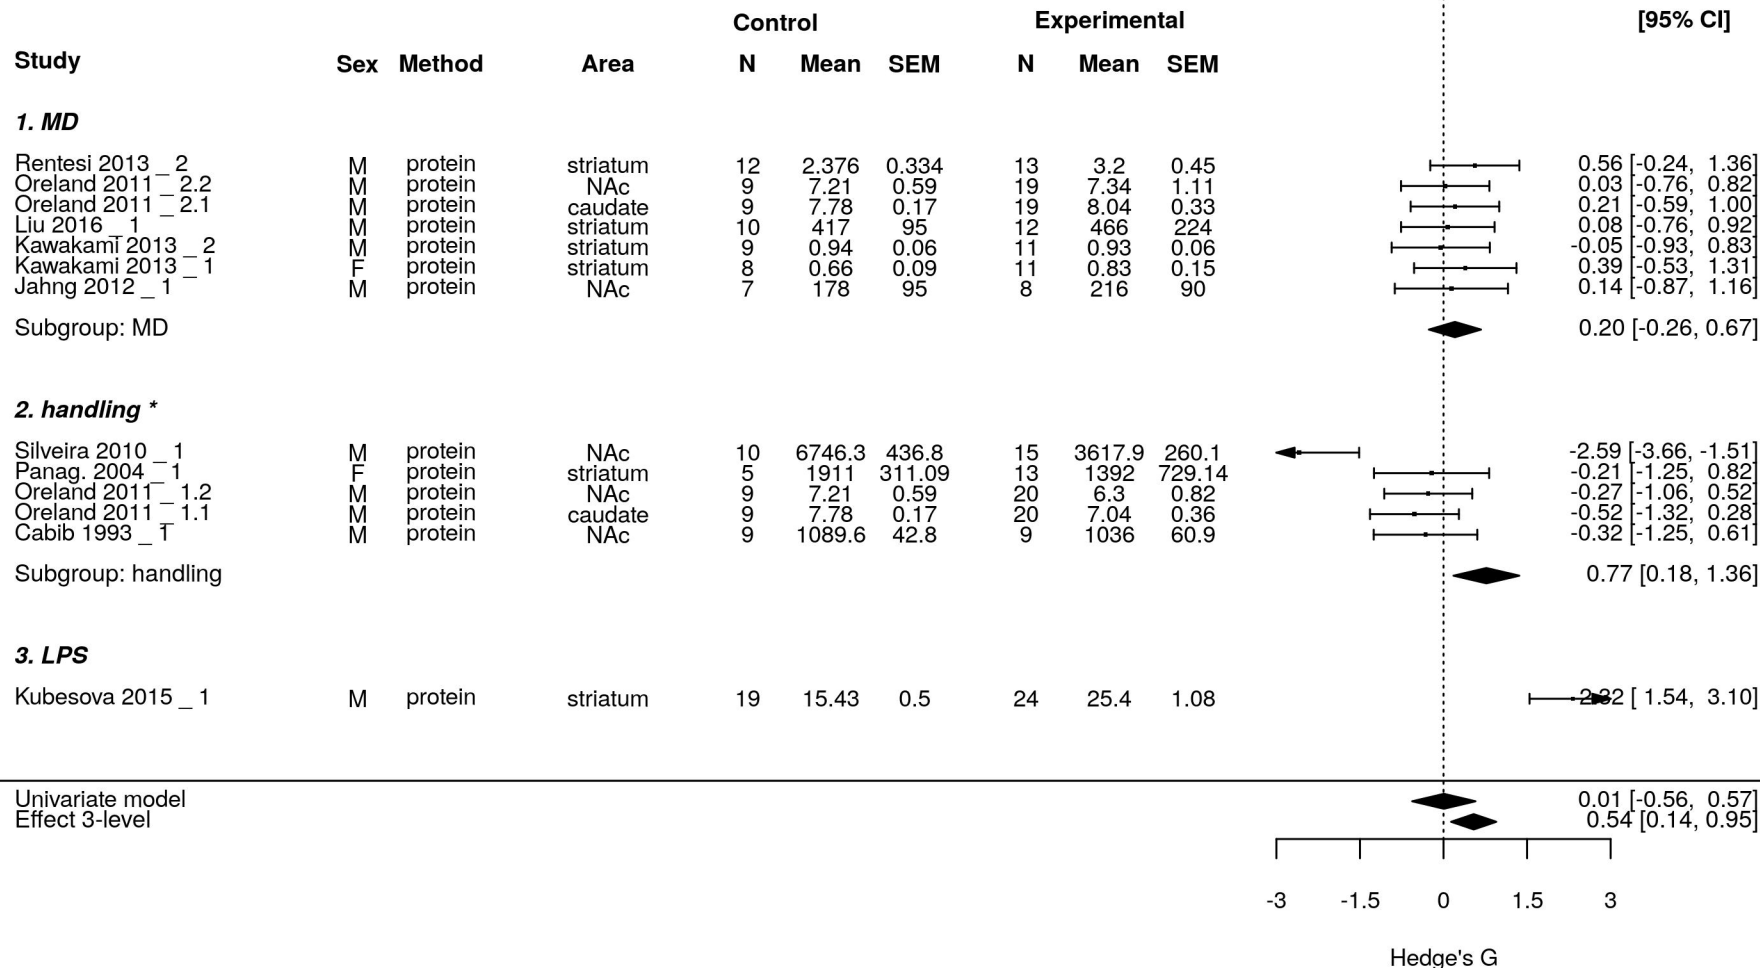

# Risk of Bias Assessment

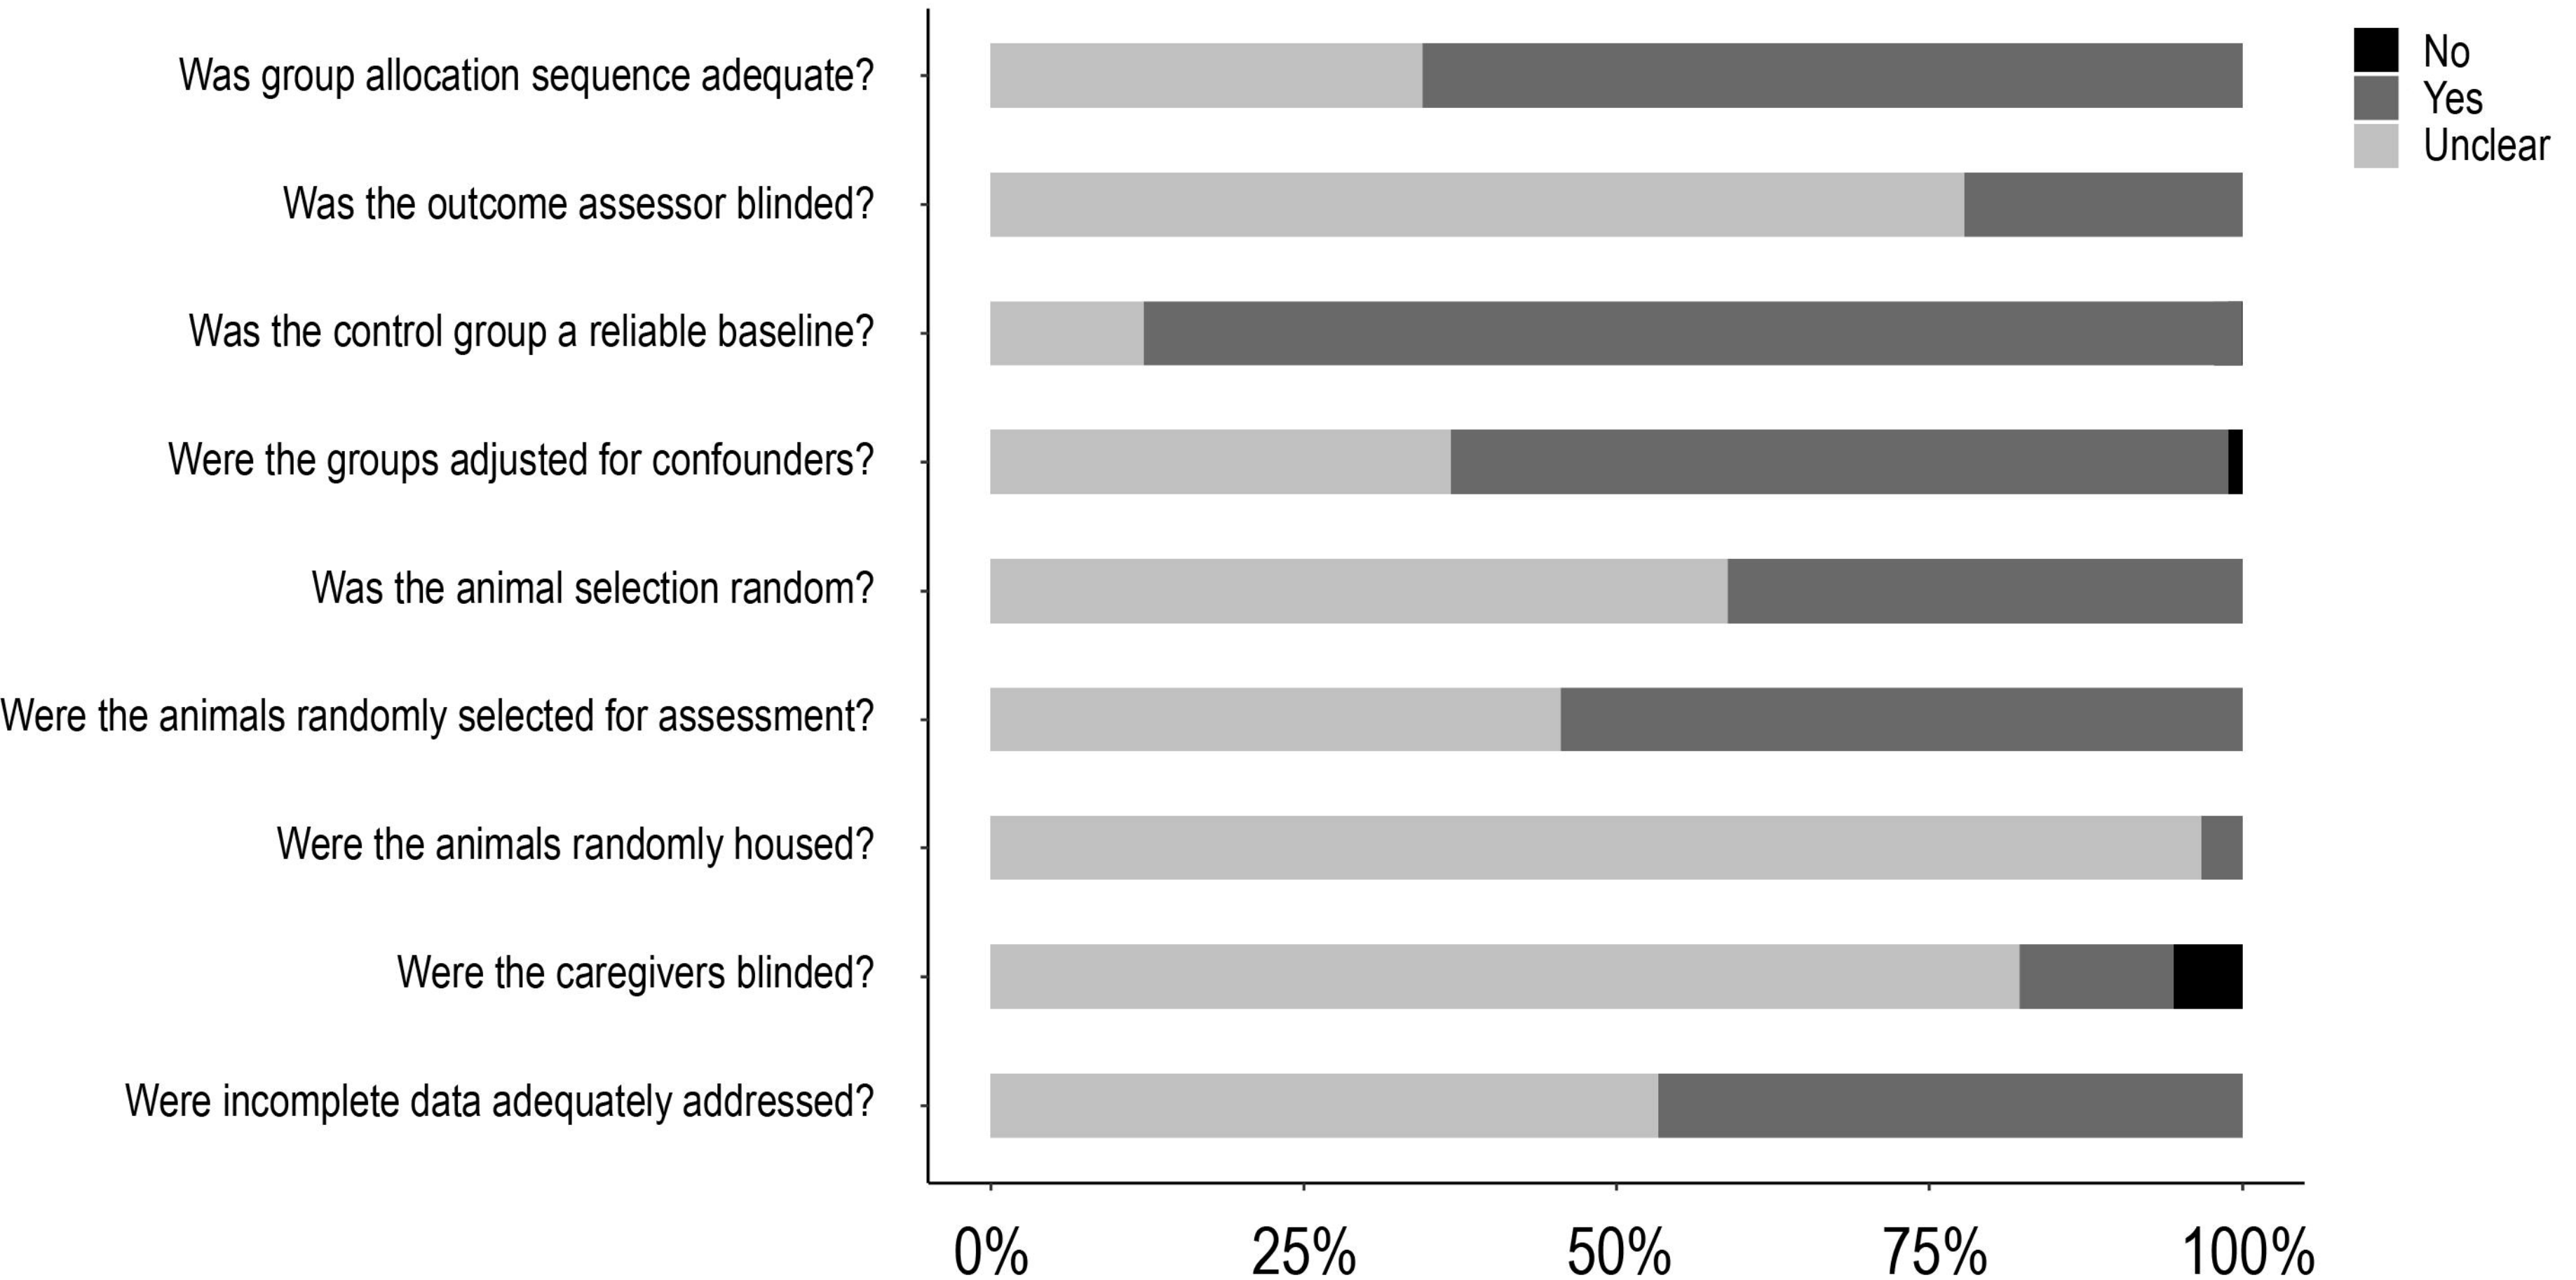

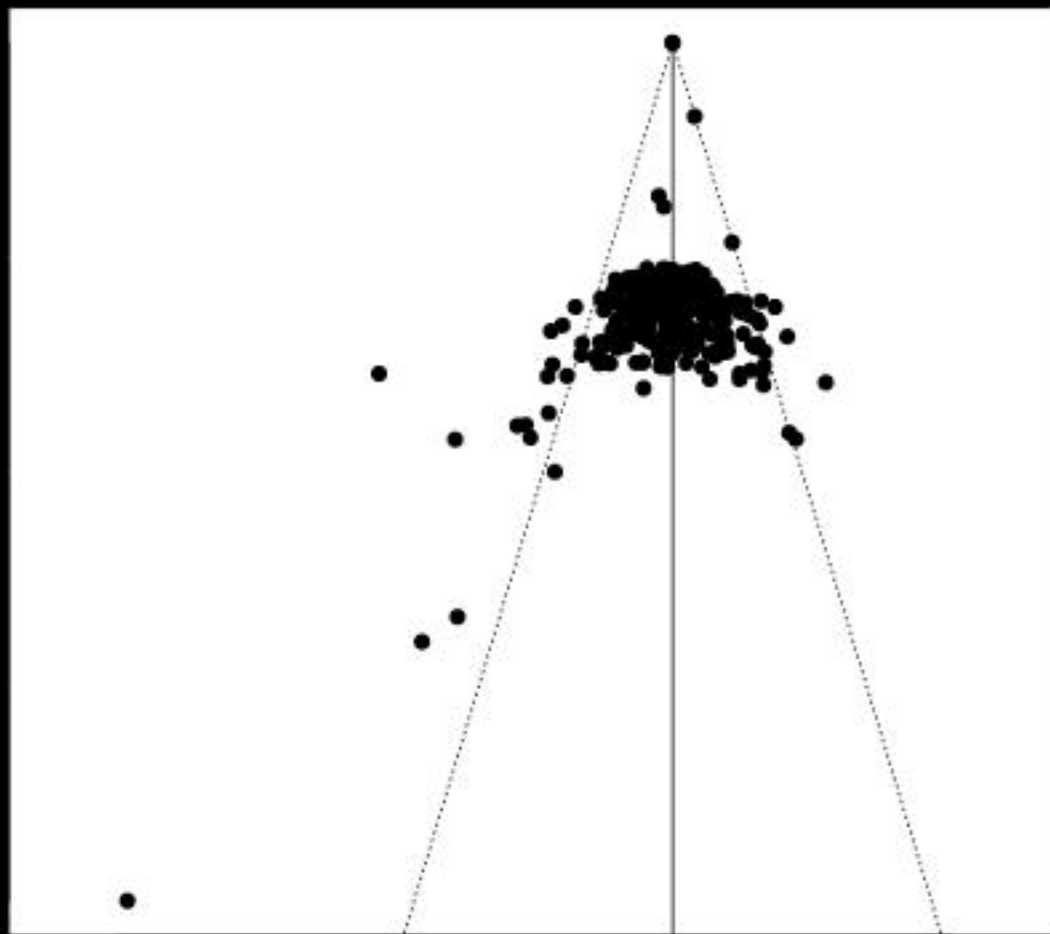

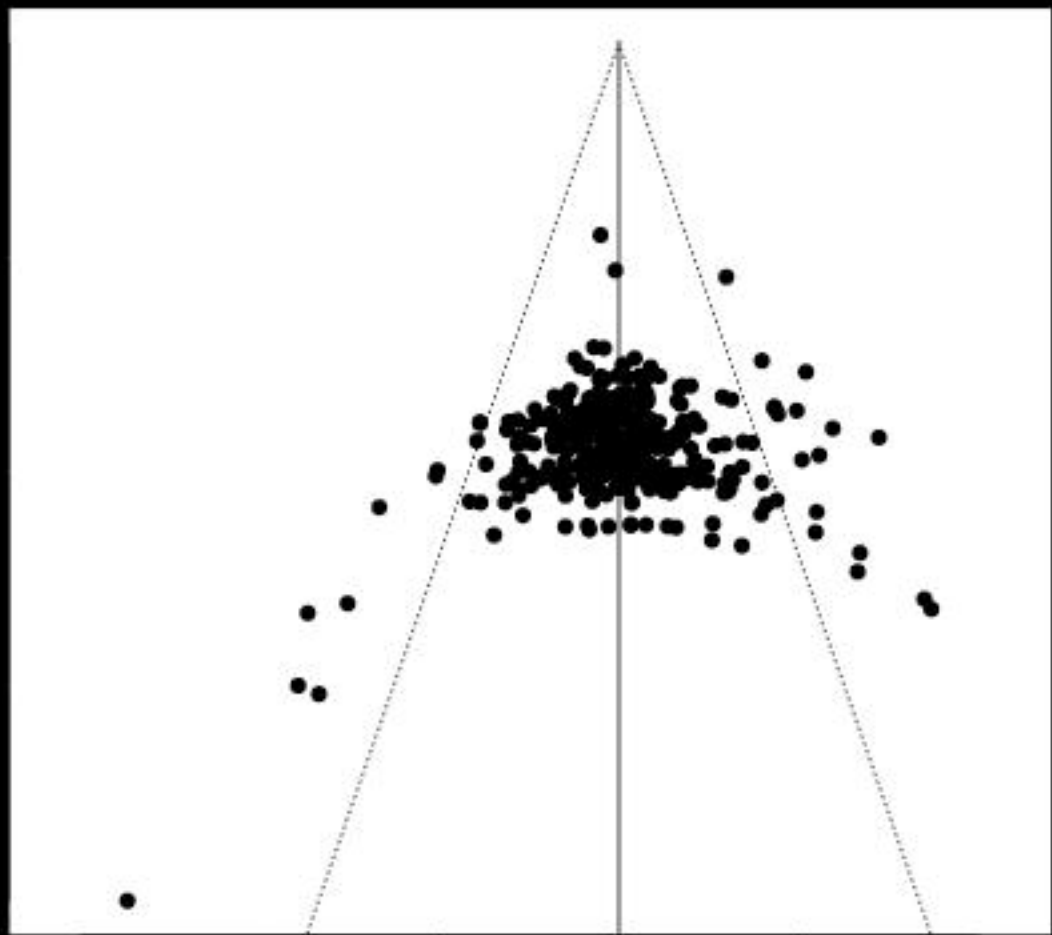

Source: http://biorxiv.org/content/10.1101/372441v1.full.pdf
